# Supplementary material
Source: PubMed Central journal article supplement (PMC2993562)
Supplement: NIHMS252451-supplement-1.pdf [file NIHMS252451-supplement-1.pdf]

## Tertiary Aminourea-Catalyzed Enantioselective Iodolactonization

Gemma E. Veitch and Eric N. Jacobsen\*

*Department of Chemistry and Chemical Biology, Harvard University; Cambridge, MA 02138*

### Contents

|                                                                             |     |
|-----------------------------------------------------------------------------|-----|
| A. General information.....                                                 | S1  |
| B. Experimental procedures and characterization data.....                   | S2  |
| C. <sup>1</sup> H and <sup>13</sup> C NMR spectra.....                      | S11 |
| D. Chiral HPLC and GC traces of enantioenriched iodolactone products.....   | S53 |
| E. Optimization of catalyst and iodinating agent.....                       | S73 |
| F. Determination of the absolute configuration of iodolactone products..... | S74 |
| G. Experimental support for the intermediacy of <b>7</b> .....              | S75 |

### A. General Information

All reactions were carried out under a nitrogen atmosphere. Optimization reactions were performed in flame-dried 2-dram vials; other reactions were performed in flame-dried 20 mL scintillation vials. Stainless steel syringes were used to transfer air- and moisture-sensitive liquids. Flash chromatography was performed using silica gel 60 (230-400mesh) from EM Science. Commercial reagents were purchased from Sigma Aldrich, Alfa Aesar, Lancaster, Otava or TCI, and used as received with the following exceptions: dichloromethane, tetrahydrofuran, and methanol were dried by passing through columns of activated alumina, *N*-iodosuccinimide was recrystallized from a mixture of dioxane and carbon tetrachloride. Proton nuclear magnetic resonance (<sup>1</sup>H NMR) spectra and carbon nuclear magnetic resonance (<sup>13</sup>C NMR) spectra were recorded on Inova-500 (500 MHz) and Inova-600 (600 MHz) spectrometers. Chemical shifts for protons are reported in parts per million downfield from tetramethylsilane and are referenced to residual protium in the NMR solvent (CHCl<sub>3</sub> = δ 7.27). Chemical shifts for carbon are reported in parts per million downfield from tetramethylsilane and are referenced to the carbon resonances of the solvent (CDCl<sub>3</sub> = δ 77.0). Data are represented as follows: chemical shift, multiplicity (br. s = broad, s = singlet, d = doublet, t = triplet, q = quartet, m = multiplet), coupling constants in Hertz (Hz), integration. Infrared (IR) spectra were obtained using a Bruker Optics Tensor 27 FTIR spectrometer. Optical rotations were measured using a 1 mL cell with a 0.5 dm path length on a Jasco DIP 370 digital polarimeter. The mass spectral data were obtained on an Agilent Technologies 6120 quadrupole LC/MS spectrometer. Gas chromatography (GC) analysis was performed on an Agilent Technologies 7890A gas chromatograph using an HP-5 (30 m x 0.32 mm x 0.25 μm) column, chiral HPLC analysis was performed using a Shimadzu VP-series instrument.

## B. Experimental Procedures and Characterisation

### Preparation of Catalyst 1

#### *N*-((1*R*, 2*R*)-2-aminocyclohexyl)acetamide

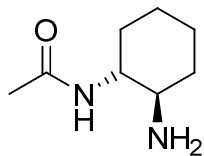

*N*-((1*R*, 2*R*)-2-aminocyclohexyl)acetamide was prepared according to the procedure of Mitchell.<sup>[1]</sup>

#### (1*R*, 2*R*)-*N*<sup>1</sup>, *N*<sup>1</sup>-dipentylcyclohexane-1,2-diamine

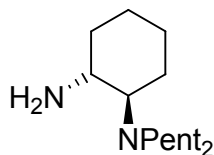

Prepared from *N*-((1*R*, 2*R*)-2-aminocyclohexyl)acetamide *via* reductive amination with valeraldehyde and subsequent acetamide hydrolysis according to the procedure of Fuerst.<sup>[2]</sup>

#### 1-(3,5-bis(trifluoromethyl)phenyl)-3-((1*R*, 2*R*)-2-(dipentylamino)cyclohexyl)urea **1**

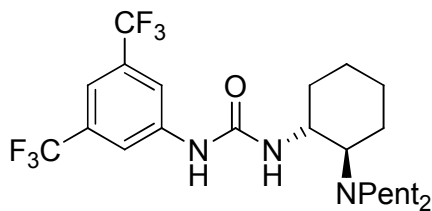

To a solution of (1*R*, 2*R*)-*N*<sup>1</sup>, *N*<sup>1</sup>-dipentylcyclohexane-1,2-diamine (2.00 g, 7.87 mmol) in CH<sub>2</sub>Cl<sub>2</sub> (20 mL) was added bistrifluoromethylphenyl isocyanate (1.27 mL, 7.50 mmol) over 5 min. After 4 h the reaction mixture was concentrated in vacuo and purified via column chromatography on silica gel (0-20% MeOH in CH<sub>2</sub>Cl<sub>2</sub>) to afford **1** as a white solid (2.65 g, 69%); [ $\alpha$ ]<sub>D</sub><sup>23</sup> = -46.6 (*c* = 1.0, CHCl<sub>3</sub>); IR (Film) 2980, 2932, 1681, 1665, 1574, 1491, 1474, 1387, 1277, 1130, 879, 681 cm<sup>-1</sup>; <sup>1</sup>H NMR (CDCl<sub>3</sub>, 500 MHz): 7.89 (s, 2 H), 7.50 (s, 1 H), 6.79 (s, 1 H), 5.75 (s, 1 H), 3.33 (t, *J* = 9.0 Hz, 1 H), 2.60 (d, *J* = 12 Hz, 1 H), 2.53-2.47 (m, 2 H), 2.34-2.27 (m, 3 H), 1.90-1.83 (m, 2 H), 1.71 (d, *J* = 13 Hz, 1 H), 1.47-1.43 (m, 2 H), 1.37-1.20 (m, 13 H), 1.11 (q, *J* = 13.5 Hz, 1 H), 0.87 (t, *J* = 6.5 Hz, 6 H); <sup>13</sup>C NMR (CDCl<sub>3</sub>, 125 MHz): 155.8, 141.0, 132.4 (q, *J* = 33.6 Hz), 123.4 (q, *J* = 271.3 Hz), 118.9, 115.9, 63.6, 52.3, 50.0, 33.5, 30.0, 29.0, 25.9, 24.7, 23.5, 22.8, 14.3; MS (ESI-APCI) exact mass calculated for [M+H] (C<sub>25</sub>H<sub>37</sub>F<sub>6</sub>N<sub>3</sub>O) requires *m/z* 510.3, found *m/z* 510.3.

### Phenyliodine(III) Bis(4-fluorophthalimidate)<sup>[3]</sup>

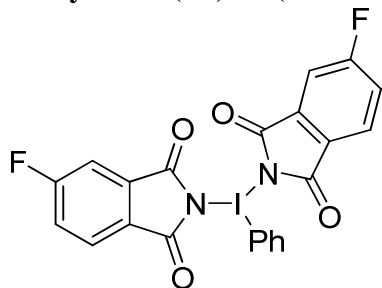

To potassium 4-fluorophthalimide<sup>[4]</sup> (3.88 g, 19.11 mmol) in MeCN (105 mL) was added bis-(trifluoroacetoxy)-iodobenzene (4.10 g, 9.56 mmol). The reaction mixture was stirred at ambient temperature for 24 h and then filtered, washing with MeCN and dried *in vacuo* to afford an off-white solid (4.47 g, 88%). This product was used immediately in the subsequent step.

### 4-Fluoro-N-iodophthalimide 5

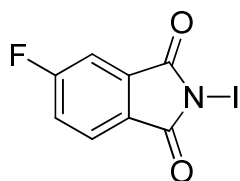

To phenyliodine(III) bis(4-fluorophthalimidate) (4.47 g, 8.42 mmol) in CCl<sub>4</sub> (170 mL) was added iodine (2.14 g, 8.42 mmol). The reaction mixture was stirred for 24 h and then filtered, washing with CCl<sub>4</sub>, to afford the desired product as an off-white solid (3.20 g, 65%). The reagent was stored under an inert atmosphere at 0 °C for > 6 months without observable decomposition: IR (Film) 3070, 1690, 1610, 1477, 1355, 1295, 1075, 915, 836, 730 cm<sup>-1</sup>; <sup>1</sup>H NMR (*d6* benzene, 500 MHz): 6.98 (dd, *J* = 8.5 Hz, 4.0 Hz, 1 H), 6.82 (dd, *J* = 7.0, 2.0 Hz, 1 H), 6.28 (td, *J* = 9.0, 2.0 Hz, 1 H); <sup>13</sup>C NMR (*d6* benzene, 125 MHz): 167.0, 166.9 (d, *J* = 123.9 Hz), 164.4, 135.3 (d, *J* = 9.1 Hz), 128.7 (d obs. ), 125.4 (d, *J* = 9.1 Hz), 119.7 (d, *J* = 23.6 Hz), 110.9 (d, *J* = 26.9 Hz).

### 5-Phenylhex-5-enoic acid 2a

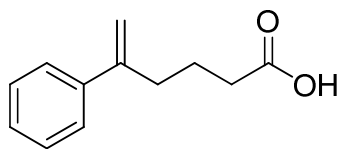

Prepared *via* Wittig reaction from the commercially available keto-acid according to the procedure of Hartwig.<sup>[5]</sup> IR (film) 2956, 1707, 1419, 1406, 1282, 1197, 887 cm<sup>-1</sup>; <sup>1</sup>H NMR (CDCl<sub>3</sub>, 500 MHz): 7.43 (d, *J* = 7.5 Hz, 2 H), 7.36 (t, *J* = 7.5 Hz, 2 H), 7.30 (t, *J* = 7.5 Hz, 1 H), 5.34 (s, 1 H), 5.11 (s, 1 H), 2.60 (t, *J* = 7 Hz, 2 H), 2.41 (t, *J* = 7.5 Hz, 2 H), 1.85-1.81 (m, 2 H); <sup>13</sup>C NMR (CDCl<sub>3</sub>, 125 MHz): 180.1, 147.6, 141.0, 128.6, 127.8, 126.4, 113.3, 34.7, 33.5, 23.3. MS (ESI-APCI) exact mass calculated for [M+H] (C<sub>12</sub>H<sub>14</sub> O<sub>2</sub>) requires *m/z* 191.1, found *m/z* 191.1.

### 5-*p*-tolylhex-5-enoic acid 2b

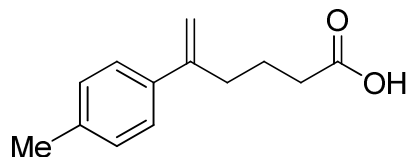

Prepared *via* Wittig reaction from the commercial keto-acid according to the procedure of Hartwig.<sup>[5]</sup> IR (Film) 1699, 1626, 1511, 1415, 1248, 953  $\text{cm}^{-1}$ ;  $^1\text{H}$  NMR ( $\text{CDCl}_3$ , 500 MHz): 7.33 (d,  $J = 8$  Hz, 2 H), 7.16 (d,  $J = 8$  Hz, 2 H), 5.31 (s, 1H), 5.06 (s, 1 H), 2.59 (t,  $J = 7.5$  Hz, 2 H), 2.40 (t,  $J = 7.5$  Hz, 2 H), 2.37 (s, 3 H), 1.82 (quin.,  $J = 7.5$  Hz);  $^{13}\text{C}$  NMR ( $\text{CDCl}_3$ , 125 MHz): 180.2, 147.3, 138.0, 137.5, 129.3, 126.2, 112.6, 34.7, 33.5, 23.3, 21.3; MS (ESI-APCI) exact mass calculated for  $[\text{M-H}]$  ( $\text{C}_{13}\text{H}_{15}\text{O}_2$ ) requires  $m/z$  203.1, found  $m/z$  203.1.

### 5-(naphthalen-2-yl)hex-5-enoic acid 2c

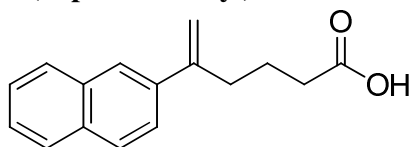

Prepared *via* Wittig reaction from the known keto-acid<sup>[6]</sup> according to the procedure of Hartwig.<sup>[5]</sup> IR (Film) 2973, 1693, 1412, 1300, 1198, 1152, 931, 754  $\text{cm}^{-1}$ ;  $^1\text{H}$  NMR ( $\text{CDCl}_3$ , 500 MHz): 7.86-7.82 (m, 3 H), 7.60 (d,  $J = 5.5$  Hz, 1 H), 7.51-7.46 (m, 2 H), 5.50 (s, 1 H), 5.22 (s, 1 H), 2.73 (t,  $J = 8.0$  Hz, 2 H), 2.45 (t,  $J = 7.5$  Hz, 2 H), 1.89 (quin.,  $J = 7.5$  Hz, 2 H);  $^{13}\text{C}$  NMR ( $\text{CDCl}_3$ , 125 MHz): 180.1, 147.4, 138.2, 133.6, 133.1, 128.4, 128.2, 127.8, 126.4, 126.1, 125.0, 124.8, 113.9, 34.7, 33.5, 23.4; MS (ESI-APCI) exact mass calculated for  $[\text{M-H}]$  ( $\text{C}_{16}\text{H}_{15}\text{O}_2$ ) requires  $m/z$  239.1, found  $m/z$  239.1.

### 5-(4-methoxyphenyl)hex-5-enoic acid 2d

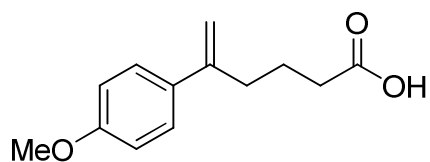

Prepared *via* Wittig reaction from the known keto-acid<sup>[7]</sup> according to the procedure of Hartwig.<sup>[5]</sup> IR (Film) 1704, 1602, 1516, 1439, 1307, 1261, 1031, 889  $\text{cm}^{-1}$ ;  $^1\text{H}$  NMR ( $\text{CDCl}_3$ , 500 MHz): 7.37 (d,  $J = 8.5$  Hz, 2 H), 6.89 (d,  $J = 8.5$  Hz, 2 H), 5.26 (s, 1 H), 5.02 (s, 1 H), 3.84 (s, 3 H), 2.57 (t,  $J = 7.5$  Hz, 2 H), 2.40 (t,  $J = 7.5$  Hz, 2 H), 1.82 (quin.,  $J = 7.5$  Hz, 2 H);  $^{13}\text{C}$  NMR ( $\text{CDCl}_3$ , 125 MHz): 180.0, 159.4, 146.8, 133.3, 127.4, 114.0, 111.8, 55.5, 34.7, 33.5, 23.3; MS (ESI-APCI) exact mass calculated for  $[\text{M-H}]$  ( $\text{C}_{13}\text{H}_{15}\text{O}_3$ ) requires  $m/z$  219.1, found  $m/z$  219.1.

### 6-methyl-5-oxoheptanoic acid

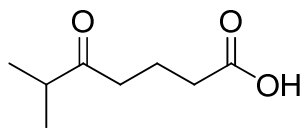

To a solution of glutaric anhydride (5 g, 43.9 mmol) in THF (20 mL) at 0 C was added isopropylmagnesium bromide (2.0 M in THF, 43.9 mmol, 21.9 mL) dropwise. The reaction mixture was then heated to reflux for 4 h and allowed to cool in ice before quenching with saturated aqueous NH<sub>4</sub>Cl solution (10 mL). Following removal of THF *in vacuo* the reaction mixture was partitioned between CH<sub>2</sub>Cl<sub>2</sub> (50 mL) and 1 M HCl (50 mL). The organic layer was then separated, dried (MgSO<sub>4</sub>) and concentrated to afford a yellow oil. Purification by column chromatography on silica gel (10-50% ethyl acetate in hexanes) afforded 6-methyl-5-oxoheptanoic acid (2.90 g, 42%) as a colourless oil; IR (film) 2971, 1703, 1457, 1408, 1385, 1239; <sup>1</sup>H NMR (CDCl<sub>3</sub>, 500 MHz): 2.57 (sept., *J* = 7 Hz, 1 H), 2.53 (t, *J* = 7.5 Hz, 2 H), 2.36 (t, *J* = 7 Hz, 2 H), 1.88 (quin., *J* = 7.5 Hz, 2 H), 1.07 (d, *J* = 7 Hz, 6 H); <sup>13</sup>C NMR (CDCl<sub>3</sub>, 125 MHz): 214.5, 179.5, 41.1, 39.1, 33.3, 18.8, 18.4.

### 6-methyl-5-methyleneheptanoic acid 2e<sup>[8]</sup>

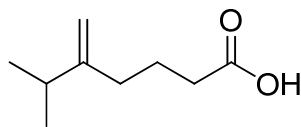

Prepared *via* Wittig reaction from the 6-methyl-5-oxoheptanoic acid according to the procedure of Hartwig.<sup>[5]</sup> Data consistent with literature values.<sup>[8]</sup>

### 3,3-dimethyl-5-phenylhex-5-enoic acid 2f

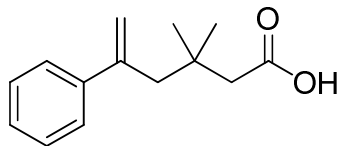

Prepared *via* Wittig reaction from the known keto-acid<sup>[9]</sup> according to the procedure of Hartwig.<sup>[5]</sup> IR (Film) 2967, 1700, 1405, 1264, 1237, 896, 779 cm<sup>-1</sup>; <sup>1</sup>H NMR (CDCl<sub>3</sub>, 500 MHz): 7.42 (d, *J* = 7.5 Hz, 2 H), 7.35 (t, *J* = 7.5 Hz, 2 H), 5.35 (s, 1 H), 5.15 (s, 1 H), 2.71 (s, 3 H), 2.24 (s, 3 H); <sup>13</sup>C NMR (CDCl<sub>3</sub>, 125 MHz): 179.4, 146.8, 143.6, 128.5, 127.5, 126.8, 117.9, 47.1, 46.1, 34.4, 28.1; MS (ESI-APCI) exact mass calculated for [M-H] (C<sub>14</sub>H<sub>17</sub>O<sub>2</sub>) requires *m/z* 217.1, found *m/z* 217.1.

### 5-(4-bromophenyl)hex-5-enoic acid 2g

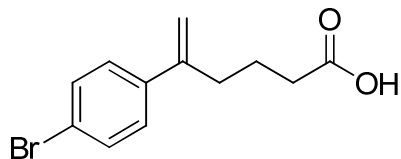

Prepared *via* Wittig reaction from the commercial keto-acid according to the procedure of Hartwig.<sup>[5]</sup> IR (film) 3080, 2957, 2917, 1703, 1488, 1438, 1250, 1168, 902, 836  $\text{cm}^{-1}$ ;  $^1\text{H}$  NMR ( $\text{CDCl}_3$ , 500 MHz): 7.47 (d,  $J = 7$  Hz, 2 H), 7.29 (d,  $J = 7$  Hz, 2 H), 5.33 (s, 1 H), 5.12 (s, 1 H), 2.56 (t,  $J = 7.5$  Hz, 2 H), 2.40 (t,  $J = 7.5$  Hz, 2 H), 1.80 (t,  $J = 7.5$  Hz, 2 H);  $^{13}\text{C}$  NMR ( $\text{CDCl}_3$ , 125 MHz): 179.9, 146.5, 139.9, 131.7, 128.0, 121.7, 113.9, 34.5, 33.4, 23.2. MS (ESI-APCI) exact mass calculated for  $[\text{M-H}]$  ( $\text{C}_{12}\text{H}_{12}\text{BrO}_2$ ) requires  $m/z$  267.0, found  $m/z$  267.0.

#### 5-(4-fluorophenyl)hex-5-enoic acid 2h

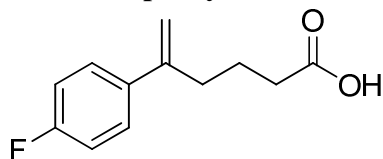

Prepared *via* Wittig reaction from the commercial keto-acid according to the procedure of Hartwig.<sup>[5]</sup> IR (Film) 1704, 1601, 1509, 1405, 1298, 1204  $\text{cm}^{-1}$ ;  $^1\text{H}$  NMR ( $\text{CDCl}_3$ , 500 MHz): 7.38 (dd,  $J = 9, 5.5$  Hz, 2 H), 7.03 (t,  $J = 8.5$  Hz, 2 H), 5.28 (s, 1 H), 5.09 (s, 1 H), 2.56 (t,  $J = 8.0$  Hz, 2 H), 2.40 (t,  $J = 7.5$  Hz, 2 H), 1.80 (quin.,  $J = 7$  Hz, 2 H);  $^{13}\text{C}$  NMR ( $\text{CDCl}_3$ , 125 MHz): 180.0, 163.6, 161.6, 146.6, 137.0, 128.0, 127.9, 115.5, 115.3, 113.3, 34.8, 33.5, 23.2; MS (ESI-APCI) exact mass calculated for  $[\text{M-H}]$  ( $\text{C}_{12}\text{H}_{12}\text{FO}_2$ ) requires  $m/z$  207.1, found  $m/z$  207.1.

#### 5-(4-chlorophenyl)hex-5-enoic acid 2i

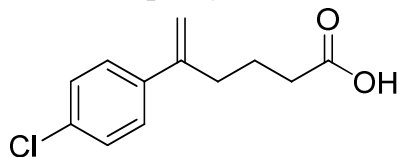

Prepared *via* Wittig reaction from the commercial keto-acid according to the procedure of Hartwig.<sup>[5]</sup> IR (Film) 1702, 1297, 1206, 922, 891, 832  $\text{cm}^{-1}$ ;  $^1\text{H}$  NMR ( $\text{CDCl}_3$ , 500 MHz): 7.36-7.30 (m, 5 H), 5.32 (s, 1 H), 5.11 (s, 1 H), 2.56 (t  $J = 8$  Hz, 2 H), 2.40 (t  $J = 7.5$  Hz, 2 H), 1.80 (quin.  $J = 7.5$  Hz, 2 H);  $^{13}\text{C}$  NMR ( $\text{CDCl}_3$ , 125 MHz): 180.0, 146.5, 139.4, 133.6, 128.8, 127.7, 113.9, 34.6, 33.5, 23.2; MS (ESI-APCI) exact mass calculated for  $[\text{M-H}]$  ( $\text{C}_{12}\text{H}_{12}\text{ClO}_2$ ) requires  $m/z$  223.0, found  $m/z$  222.9.

#### 4-Phenylpent-4-enoic acid 9a

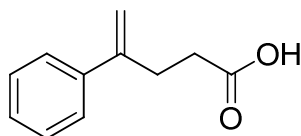

Prepared according to the procedure of Hartwig; data consistent with literature values.<sup>[5]</sup>

### 6-(iodomethyl)-6-phenyltetrahydro-2H-one **3a**

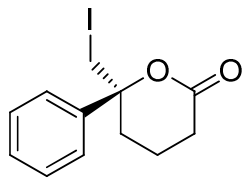

The reaction was run on 0.20 mmol scale. The crude material was purified by silica gel chromatography (5-40% ethyl acetate in hexanes) to give **3a** as a colorless oil (54.5 mg, 87%). The enantiomeric excess was determined to be 94% by chiral HPLC analysis (CHIRALPAK AD-H, 1 mL/min, 2% IPA in Hexanes,  $\lambda = 254$  nm):  $t_R(\text{major}) = 27.5$  min,  $t_R(\text{minor}) = 30.7$  min;  $[\alpha]_D^{24} = +29.1$  ( $c = 1.2$ ,  $\text{CHCl}_3$ ); IR (film) 2956, 2933, 2863, 1734, 1682, 1575, 1388, 1276, 1130, 879  $\text{cm}^{-1}$ ;  $^1\text{H NMR}$  ( $\text{CDCl}_3$ , 500 MHz): 7.41-7.36 (m, 5 H), 3.59 (m, 2 H), 2.56-2.37 (m, 4 H), 2.85-2.81 (m, 1H), 1.62-1.58 (m, 1H);  $^{13}\text{C NMR}$  ( $\text{CDCl}_3$ , 125 MHz): 170.7, 140.5, 129.3, 128.7, 125.5, 84.7, 32.3, 29.2, 17.9, 16.8; MS (ESI-APCI) exact mass calculated for  $[\text{M}+\text{Na}]$  ( $\text{C}_{12}\text{H}_{13}\text{INaO}_2$ ) requires  $m/z$  339.0, found  $m/z$  339.0.

### 6-(iodomethyl)-6-*p*-tolyltetrahydro-2H-pyran-2-one **3b**

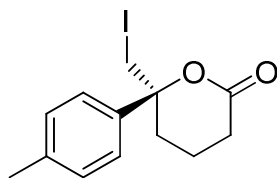

The reaction was run on 0.20 mmol scale. The crude material was purified by silica gel chromatography (5-40% ethyl acetate in hexanes) to give **3b** as a colorless oil (63.5 mg, 96%). The enantiomeric excess was determined to be 88% by chiral HPLC analysis (CHIRALPAK AD-H, 1 mL/min, 2% IPA in Hexanes,  $\lambda = 254$  nm):  $t_R(\text{major}) = 26.7$  min,  $t_R(\text{minor}) = 34.7$  min;  $[\alpha]_D^{24} = +34.1$  ( $c = 1.1$ ,  $\text{CHCl}_3$ ); IR (film) 1724, 1510, 1443, 1259, 1231, 1038, 937, 812, 634  $\text{cm}^{-1}$ ;  $^1\text{H NMR}$  ( $\text{CDCl}_3$ , 500 MHz): 7.26 (d,  $J = 8$  Hz, 2 H), 7.21 (d,  $J = 8.5$  Hz, 2 H), 3.57 (d,  $J = 12.5$  Hz, 1 H), 3.55 (d,  $J = 12.5$  Hz, 1 H), 2.50-2.32 (m, 7 H), 1.85-1.83 (m, 1 H), 1.62-1.58 (m, 1 H);  $^{13}\text{C NMR}$  ( $\text{CDCl}_3$ , 125 MHz): 170.8, 138.5, 137.4, 129.9, 125.4, 84.7, 32.2, 29.2, 21.3, 18.2, 16.8; MS (ESI-APCI) exact mass calculated for  $[\text{M}+\text{Na}]$  ( $\text{C}_{13}\text{H}_{15}\text{INaO}_2$ ) requires  $m/z$  353.0, found  $m/z$  353.0.

### 6-(iodomethyl)-6-(naphthalen-2-yl)tetrahydro-2H-pyran-2-one **3c**

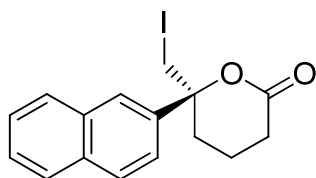

The reaction was run on 0.20 mmol scale. The crude material was purified by silica gel chromatography (5-40% ethyl acetate in hexanes) to give **3c** as a colorless oil (67.5 mg, 92%). The enantiomeric excess was determined to be 94% by chiral HPLC analysis (CHIRALPAK OD-H, 1 mL/min, 10% IPA in Hexanes,  $\lambda = 254$  nm):  $t_R(\text{major}) = 25.6$  min,  $t_R(\text{minor}) = 31.8$  min;  $[\alpha]_D^{24} = +25.8$  ( $c = 2.0$ ,  $\text{CHCl}_3$ ); IR (film) 3018, 1736, 1263, 1215, 1180, 1037, 817, 745  $\text{cm}^{-1}$ ;  $^1\text{H NMR}$  ( $\text{CDCl}_3$ , 500 MHz): 7.91-7.86 (m, 4 H), 7.56-7.54 (m, 2 H), 7.42 (d,  $J = 8$  Hz, 1 H), 3.70 (d,  $J = 11$  Hz, 1 H), 3.67 (d,  $J = 11$  Hz, 1 H), 2.56-2.42 (m, 4 H), 1.88-1.85 (m, 1

H), 1.64-1.61 (m, 1 H);  $^{13}\text{C}$  NMR ( $\text{CDCl}_3$ , 125 MHz): 170.7, 137.7, 133.3, 133.1, 129.3, 128.6, 127.8, 127.1, 125.3, 122.6, 84.8, 32.3, 29.3, 17.6, 16.9; MS (ESI-APCI) exact mass calculated for  $[\text{M}+\text{Na}]$  ( $\text{C}_{16}\text{H}_{16}\text{IO}_2$ ) requires  $m/z$  367.0, found  $m/z$  367.0.

### 6-(iodomethyl)-6-(4-methoxyphenyl)tetrahydro-2H-pyran-2-one **3d**

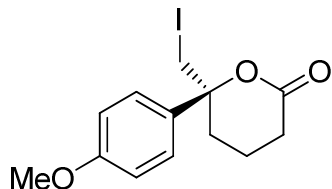

The reaction was run on 0.20 mmol scale. The crude material was purified by silica gel chromatography (5-40% ethyl acetate in hexanes) to give **3d** as a colorless oil (62.7 mg, 91%). The enantiomeric excess was determined to be 48% by chiral HPLC analysis (CHIRALPAK AD-H, 1 mL/min, 2% IPA in Hexanes,  $\lambda = 254$  nm):  $t_R$ (major) = 41.8 min,  $t_R$ (minor) = 52.4 min;  $[\alpha]_D^{24} = +11.8$  ( $c = 1.0$ ,  $\text{CHCl}_3$ ); IR (film) 3031, 1722, 1508, 1443, 1231, 1038, 812  $\text{cm}^{-1}$ ;  $^1\text{H}$  NMR ( $\text{CDCl}_3$ , 500 MHz): 7.29 (d,  $J = 9$  Hz, 2 H), 6.93 (d,  $J = 9$  Hz, 2 H), 3.84 (s, 3 H), 3.58 (d,  $J = 11$  Hz, 1 H), 3.54 (d,  $J = 11$  Hz, 1 H), 2.49-2.35 (m, 4 H), 1.84-1.81 (m, 1 H), 1.64-1.61 (m, 1 H);  $^{13}\text{C}$  NMR ( $\text{CDCl}_3$ , 125 MHz): 170.8, 159.7, 132.2, 126.8, 114.5, 84.5, 55.6, 32.0, 29.2, 18.3, 16.8; MS (ESI-APCI) exact mass calculated for  $[\text{M}+\text{H}]$  ( $\text{C}_{13}\text{H}_{16}\text{IO}_3$ ) requires  $m/z$  347.0, found  $m/z$  347.1.

### 6-(iodomethyl)-6-isopropyltetrahydro-2H-pyran-2-one **3e**

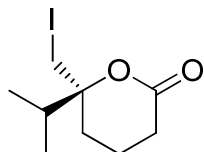

The reaction was run on 0.20 mmol scale. The crude material was purified by silica gel chromatography (5-40% ethyl acetate in hexanes) to give **3e** as a colorless oil (48 mg, 85%). The enantiomeric excess was determined to be 94% by chiral GC analysis ( $\gamma$ -TA, 150  $^\circ\text{C}$  isothermal,  $t_R$ (major) = 30.7 min,  $t_R$ (minor) = 50.7 min;  $[\alpha]_D^{24} = +8.6$  ( $c = 2.0$ ,  $\text{CHCl}_3$ ); IR (film) 2956, 2882, 1733, 1472, 1457, 1207, 1228, 1029  $\text{cm}^{-1}$ ;  $^1\text{H}$  NMR ( $\text{CDCl}_3$ , 500 MHz): 3.46 (s, 2 H), 2.55 (dt,  $J = 18.5, 6.5$  Hz, 1 H), 2.44 (dt,  $J = 18, 7$  Hz, 1 H), 2.23 (sept.,  $J = 7$  Hz, 1 H), 2.08-2.04 (m, 1 H), 1.96-1.89 (m, 3 H), 1.02 (d,  $J = 7$  Hz, 6 H);  $^{13}\text{C}$  NMR ( $\text{CDCl}_3$ , 125 MHz): 170.8, 85.2, 35.6, 29.9, 27.2, 17.1, 16.8, 13.1; MS (ESI-APCI) exact mass calculated for  $[\text{M}+\text{Na}]$  ( $\text{C}_9\text{H}_{15}\text{NaIO}_2$ ) requires  $m/z$  305.0, found  $m/z$  305.0.

### 6-(iodomethyl)-4,4-dimethyl-6-phenyltetrahydro-2H-pyran-2-one **3f**

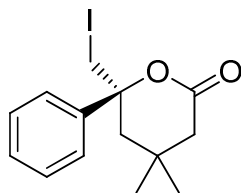



The reaction was run on 0.20 mmol scale. The crude material was purified by silica gel chromatography (5-40% ethyl acetate in hexanes) to give **3f** as a colorless oil (62 mg, 90%). The enantiomeric excess was determined to be 87% by chiral HPLC analysis (CHIRALPAK AD-H, 1 mL/min, 2% IPA in Hexanes,  $\lambda = 254$  nm):  $t_R(\text{major}) = 16.6$  min,  $t_R(\text{minor}) = 19.5$  min;  $[\alpha]_D^{24} = +26.7$  ( $c = 1.1$ ,  $\text{CHCl}_3$ ); IR (film) 2962, 1732, 1444, 1259, 1187, 1037, 812, 702  $\text{cm}^{-1}$ ;  $^1\text{H NMR}$  ( $\text{CDCl}_3$ , 500 MHz): 7.46 (d,  $J = 8$  Hz, 2 H), 7.40 (t,  $J = 8$  Hz, 2 H), 7.34 (t,  $J = 8$  Hz, 1 H), 3.55 (d,  $J = 11$  Hz, 1 H), 3.49 (d,  $J = 11$  Hz, 1 H), 2.49 (d,  $J = 14.5$  Hz, 1 H), 2.33 (d,  $J = 14.5$  Hz, 1 H), 2.30 (d,  $J = 16$  Hz, 1 H), 2.21 (d,  $J = 16$  Hz, 1 H), 1.12 (s, 3 H), 0.77 (s, 3 H);  $^{13}\text{C NMR}$  ( $\text{CDCl}_3$ , 125 MHz): 171.1, 141.3, 129.1, 128.5, 125.3, 83.5, 44.6, 43.8, 32.0, 30.8, 28.8, 20.7; MS (ESI-APCI) exact mass calculated for  $[\text{M}+\text{Na}]$  ( $\text{C}_{14}\text{H}_{17}\text{INaO}_2$ ) requires  $m/z$  367.0, found  $m/z$  367.0.

### 6-(4-bromophenyl)-6-(iodomethyl)tetrahydro-2H-pyran-2-one **3g**

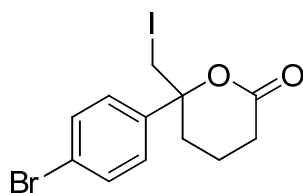

The reaction was run on 0.20 mmol scale. The crude material was purified by silica gel chromatography (5-40% ethyl acetate in hexanes) to give **3g** as a crystalline solid (56 mg, 71%). The enantiomeric excess was determined to be 96% by chiral HPLC analysis (CHIRALPAK AD-H, 1 mL/min, 2% IPA in Hexanes,  $\lambda = 254$  nm):  $t_R(\text{major}) = 35.6$  min,  $t_R(\text{minor}) = 49.6$  min;  $[\alpha]_D^{24} = +28.7$  ( $c = 1.4$ ,  $\text{CHCl}_3$ ); IR (film) 2957, 2929, 1740, 1489, 1238, 1180, 1132, 1039  $\text{cm}^{-1}$ ;  $^1\text{H NMR}$  ( $\text{CDCl}_3$ , 500 MHz): 7.55 (d,  $J = 8$  Hz, 2 H), 7.27 (d,  $J = 8$  Hz, 2 H), 3.55 (s, 2 H), 2.55-2.31 (m, 4 H), 1.84 (m, 1 H), 1.59 (m, 1 H);  $^{13}\text{C NMR}$  ( $\text{CDCl}_3$ , 125 MHz): 170.2, 139.7, 132.4, 127.3, 122.9, 84.3, 32.2, 29.2, 17.1, 16.8; MS (ESI-APCI) exact mass calculated for  $[\text{M}+\text{H}]$  ( $\text{C}_{12}\text{H}_{13}^{79}\text{BrIO}_2$ ) requires  $m/z$  394.9, found  $m/z$  394.9.

### 6-(4-fluorophenyl)-6-(iodomethyl)tetrahydro-2H-pyran-2-one **3h**

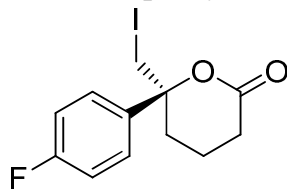

The reaction was run on 0.20 mmol scale. The crude material was purified by silica gel chromatography (5-40% ethyl acetate in hexanes) to give **3h** as a colorless oil (61 mg, 91%). The enantiomeric excess was determined to be 96% by chiral HPLC analysis (CHIRALPAK AD-H, 1 mL/min, 2% IPA in Hexanes,  $\lambda = 254$  nm):  $t_R(\text{major}) = 32.8$  min,  $t_R(\text{minor}) = 38.5$  min;  $[\alpha]_D^{24} = +22.7$  ( $c = 1.3$ ,  $\text{CHCl}_3$ ); IR (film) 2962.2, 2872, 1733, 1603, 1509, 1443, 1411, 1231, 1186, 1038, 936, 841  $\text{cm}^{-1}$ ;  $^1\text{H NMR}$  ( $\text{CDCl}_3$ , 500 MHz): 7.29 (dd,  $J = 8, 5.5$  Hz, 2 H), 7.02 (t,  $J = 8$  Hz, 2 H), 3.47 (m, 2 H), 2.46-2.25 (m, 4 H), 1.79 (m, 1 H), 1.52 (m, 1 H);  $^{13}\text{C NMR}$  ( $\text{CDCl}_3$ , 125 MHz): 170.4, 163.7, 161.8, 136.3, 127.5, 127.4, 116.3, 116.1, 84.3, 32.2, 29.2, 17.7, 16.8; MS (ESI-APCI) exact mass calculated for  $[\text{M}+\text{Na}]$  ( $\text{C}_{12}\text{H}_{12}\text{FINaO}_2$ ) requires  $m/z$  357.0, found  $m/z$  357.0.

### 6-(4-chlorophenyl)-6-(iodomethyl)tetrahydro-2H-pyran-2-one **3i**

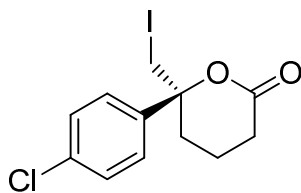

The reaction was run on 0.20 mmol scale. The crude material was purified by silica gel chromatography (5-40% ethyl acetate in hexanes) to give **3i** as a colorless oil (56 mg, 80%). The enantiomeric excess was determined to be 96% by chiral HPLC analysis (CHIRALPAK AD-H, 1 mL/min, 2% IPA in Hexanes,  $\lambda = 254$  nm):  $t_R(\text{major}) = 32.9$  min,  $t_R(\text{minor}) = 44.3$  min;  $[\alpha]_D^{24} = +27.8$  ( $c = 1.0$ ,  $\text{CHCl}_3$ ); IR (film) 2957, 1738, 1492, 1278, 1179, 1094, 1039, 822,  $752\text{ cm}^{-1}$ ;  $^1\text{H NMR}$  ( $\text{CDCl}_3$ , 500 MHz): 7.31 (d,  $J = 8.5$  Hz, 2 H), 7.22 (d,  $J = 8.5$  Hz, 2 H), 3.47 (s, 2 H), 2.43-2.26 (m, 4 H), 1.78 (m, 1 H), 1.50 (m, 1 H),  $^{13}\text{C NMR}$  ( $\text{CDCl}_3$ , 125 MHz): 170.3, 139.1, 134.8, 129.4, 127.0, 84.3, 32.2, 29.2, 17.3, 16.8; MS (ESI-APCI) exact mass calculated for  $[\text{M}+\text{Na}]$  ( $\text{C}_{12}\text{H}_{12}^{35}\text{ClINaO}_2$ ) requires  $m/z$  372.9, found  $m/z$  372.9.

### 5-(iodomethyl)-5-phenyldihydrofuran-2(3H)-one **10a**

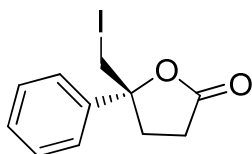

The reaction was run on 0.20 mmol scale. The crude material was purified by silica gel chromatography (5-40% ethyl acetate in hexanes) to give **10a** as a colorless oil (52.5 mg, 87%). The enantiomeric excess was determined to be 89% by chiral HPLC analysis (CHIRALPAK AD-H, 1 mL/min, 2% IPA in Hexanes,  $\lambda = 254$  nm):  $t_R(\text{major}) = 24.1$  min,  $t_R(\text{minor}) = 27.8$  min;  $[\alpha]_D^{24} = +14.2$  ( $c = 1.3$ ,  $\text{CHCl}_3$ ); IR (film) 3030, 2958, 1779, 1541, 1449, 1154, 1025, 929,  $766\text{ cm}^{-1}$ ;  $^1\text{H NMR}$  ( $\text{CDCl}_3$ , 500 MHz): 7.43-7.27 (m, 5 H), 3.66 (d,  $J = 11$  Hz, 1 H), 3.64 (d,  $J = 11$  Hz, 1 H), 2.77-2.50 (m, 4 H);  $^{13}\text{C NMR}$  ( $\text{CDCl}_3$ , 125 MHz): 175.5, 140.9, 129.1, 128.8, 125.1, 86.3, 34.2, 29.4, 16.5; MS (ESI-APCI) exact mass calculated for  $[\text{M}+\text{H}]$  ( $\text{C}_{11}\text{H}_{12}\text{IO}_2$ ) requires  $m/z$  303.1, found  $m/z$  303.1; Data consistent with literature values.<sup>[10]</sup>

All of the iodolactone products were treated as light-sensitive and were stored at  $-30\text{ }^\circ\text{C}$  under argon. These products should not be subjected to high-vacuum for  $>10$  min.

S/N = 351

Pulse Sequence: s2pu1

Solvent: CDC13

Temp. 24.0 C / 297.1 K

INOVA-500 "inova500c"

Relax. delay 10.000 sec

Pulse 54.0 degrees

Acq. time 2.184 sec

Width 7501.2 Hz

32 repetitions

OBSERVE H1, 499.8716828 MHz

DATA PROCESSING

Line broadening 1.1 Hz

FT size 32768

Total time 6 min, 54 sec

### C. 1H and 13C NMR Spectra

Filename: \_

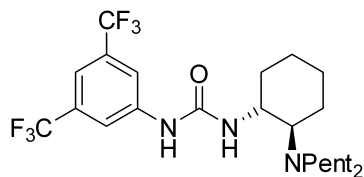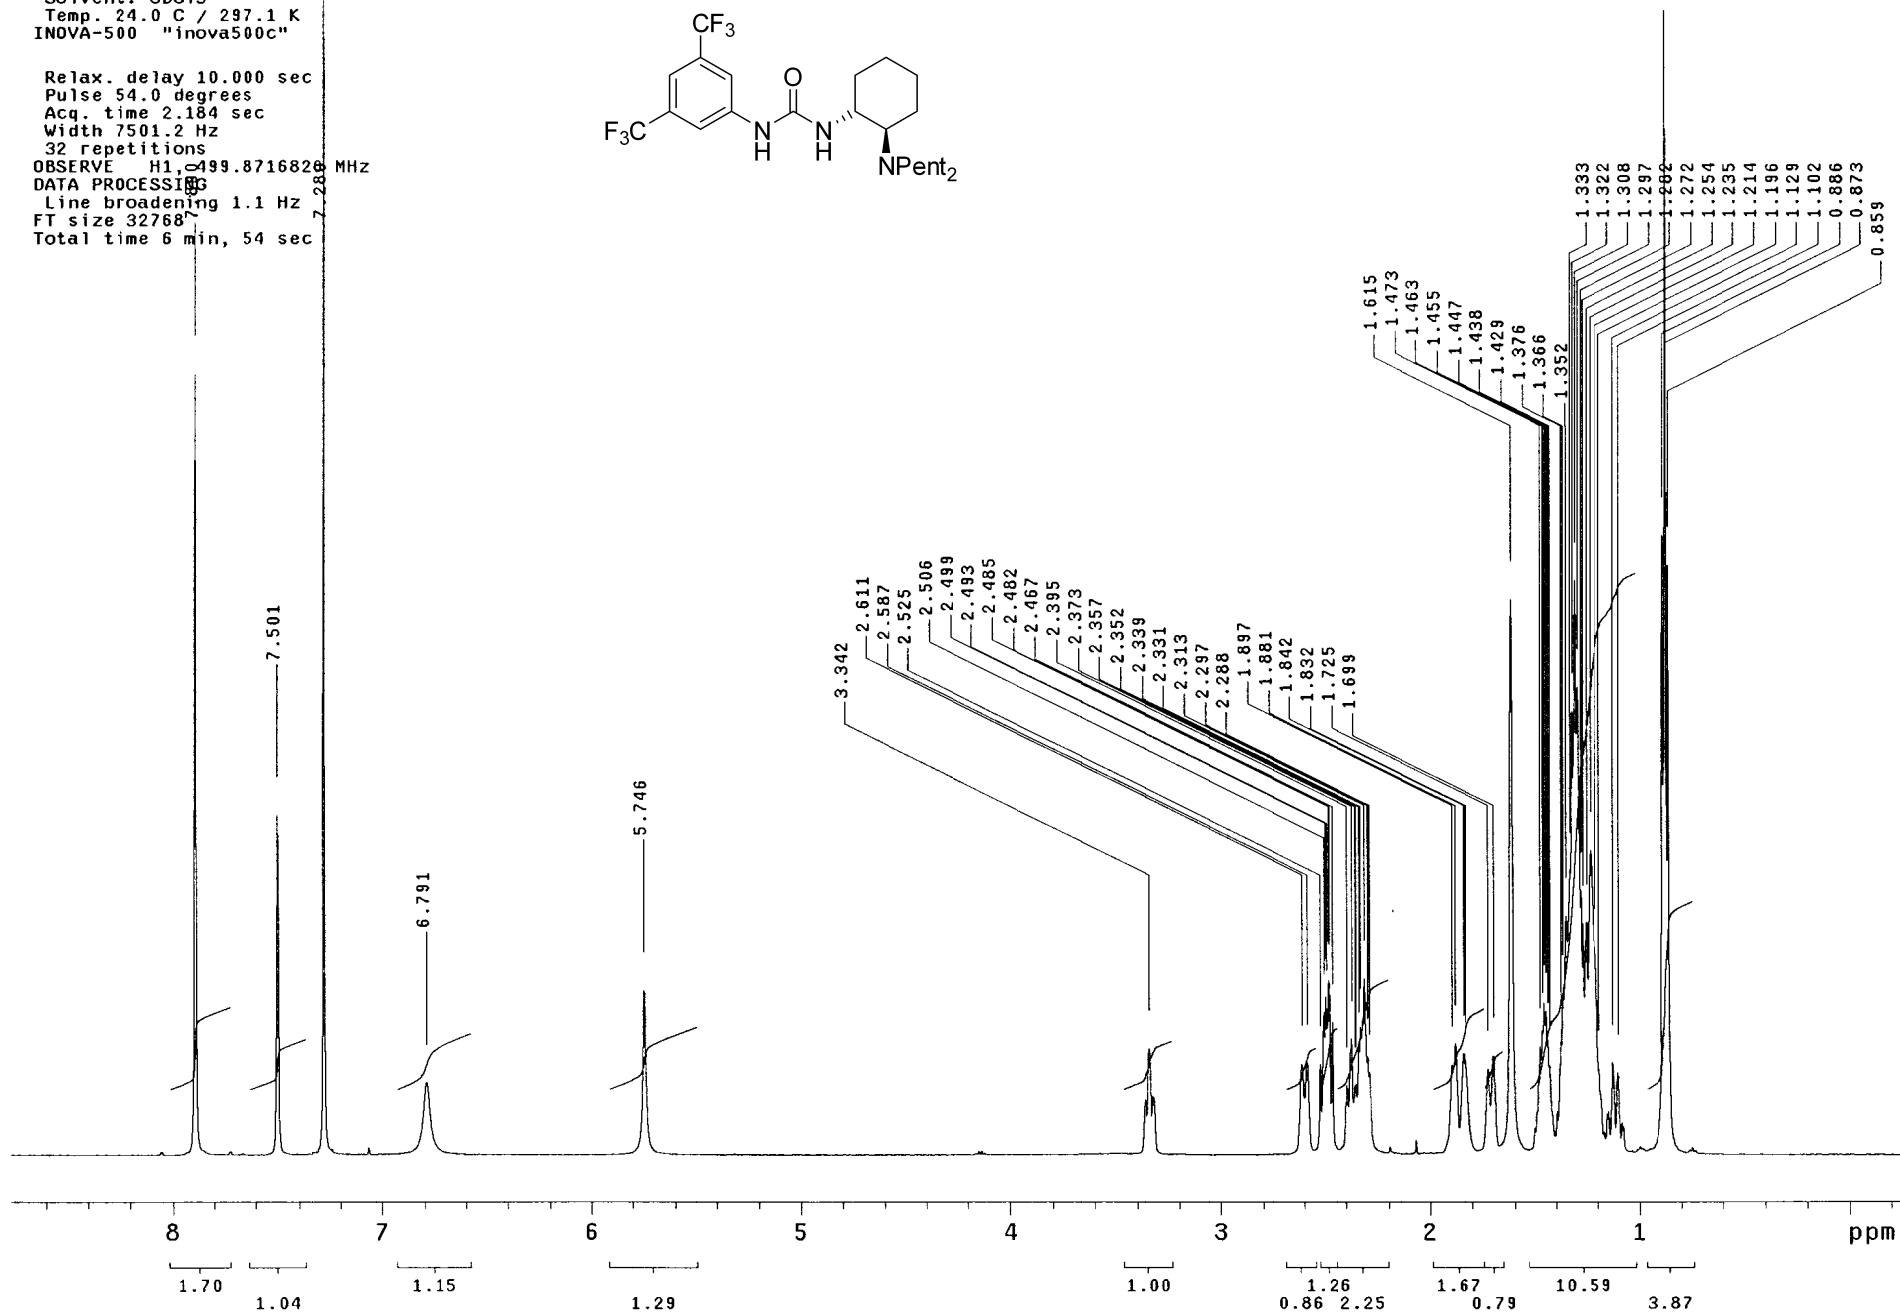

STANDARD CARBON PARAMETERS

Pulse Sequence: s2pu1

Solvent: CDC13

Temp. 25.0 C / 298.1 K

User: 1-14-87

INOVA-500 "inova500c"

Pulse 30.0 degrees

Acq. time 1.092 sec

Width 29996.3 Hz

992 repetitions

OBSERVE C13, 125.6928044 MHz

DECOUPLE H1, 499.8741814 MHz

Power 48 dB

continuously on

WALTZ-16 modulated

DATA PROCESSING

Line broadening 1.0 Hz

FT size 65536

Total time 1 hr, 15 min, 13 sec

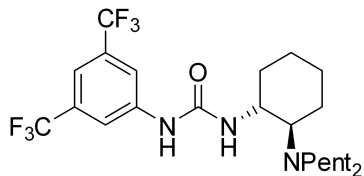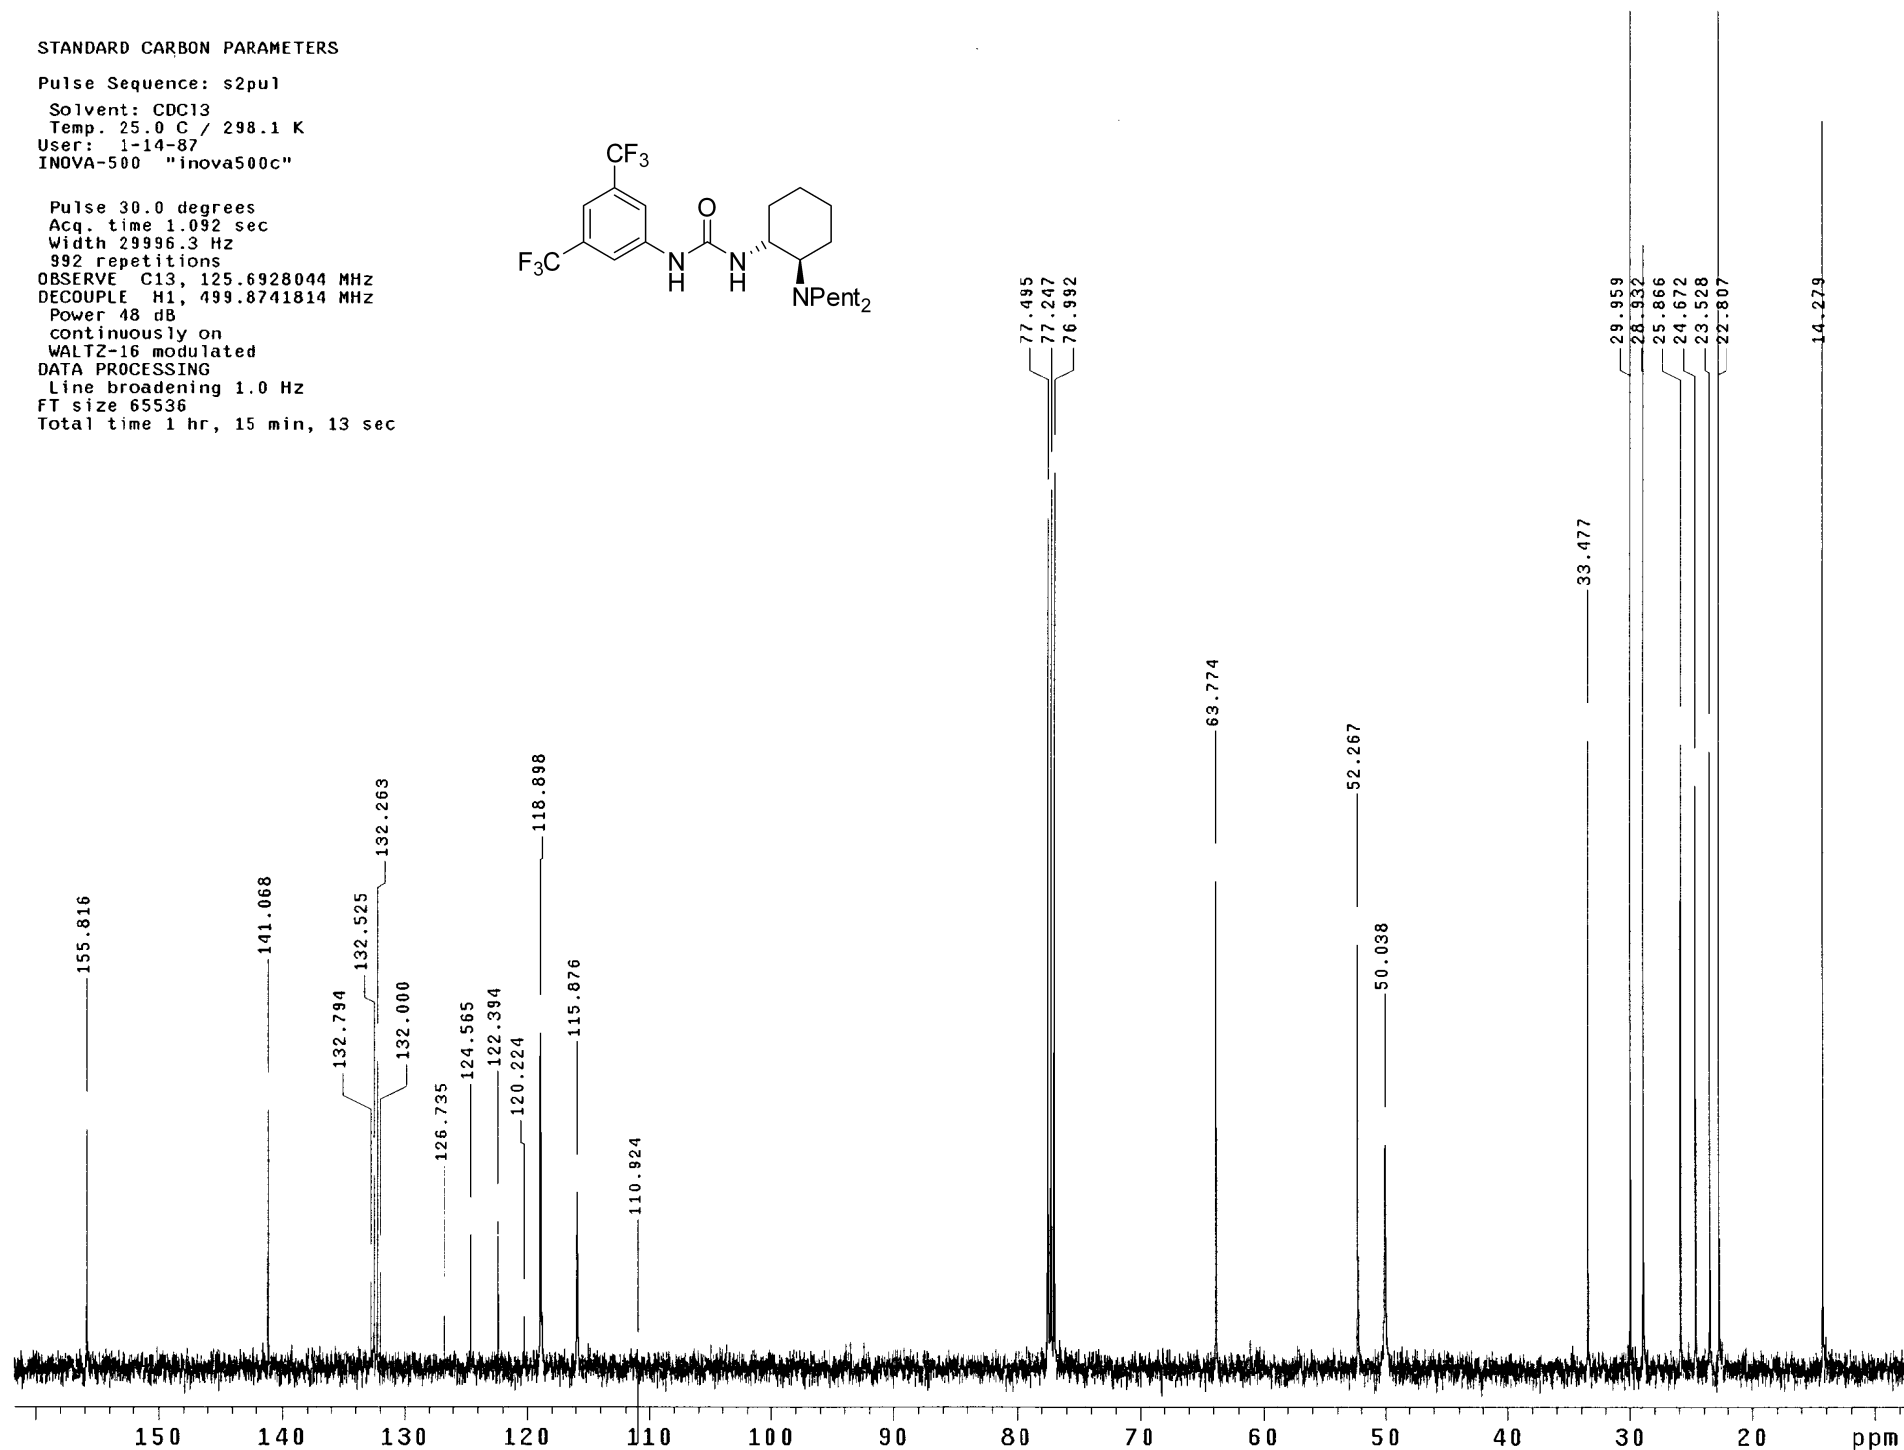

S/N = 351  
 Pulse Sequence: s2pu1  
 Solvent: CDC13  
 Temp. 24.0 C / 297.1 K  
 INOVA-500 "inova500c"

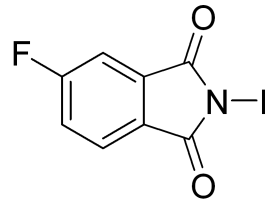

Pulse 54.0 degrees  
 Acq. time 2.184 sec  
 Width 7501.2 Hz  
 32 repetitions  
 OBSERVE H1, 499.8718631 MHz  
 DATA PROCESSING  
 C13 90 degree broadening 1.1 Hz  
 File size 32768  
 Total time 1 min, 14 sec

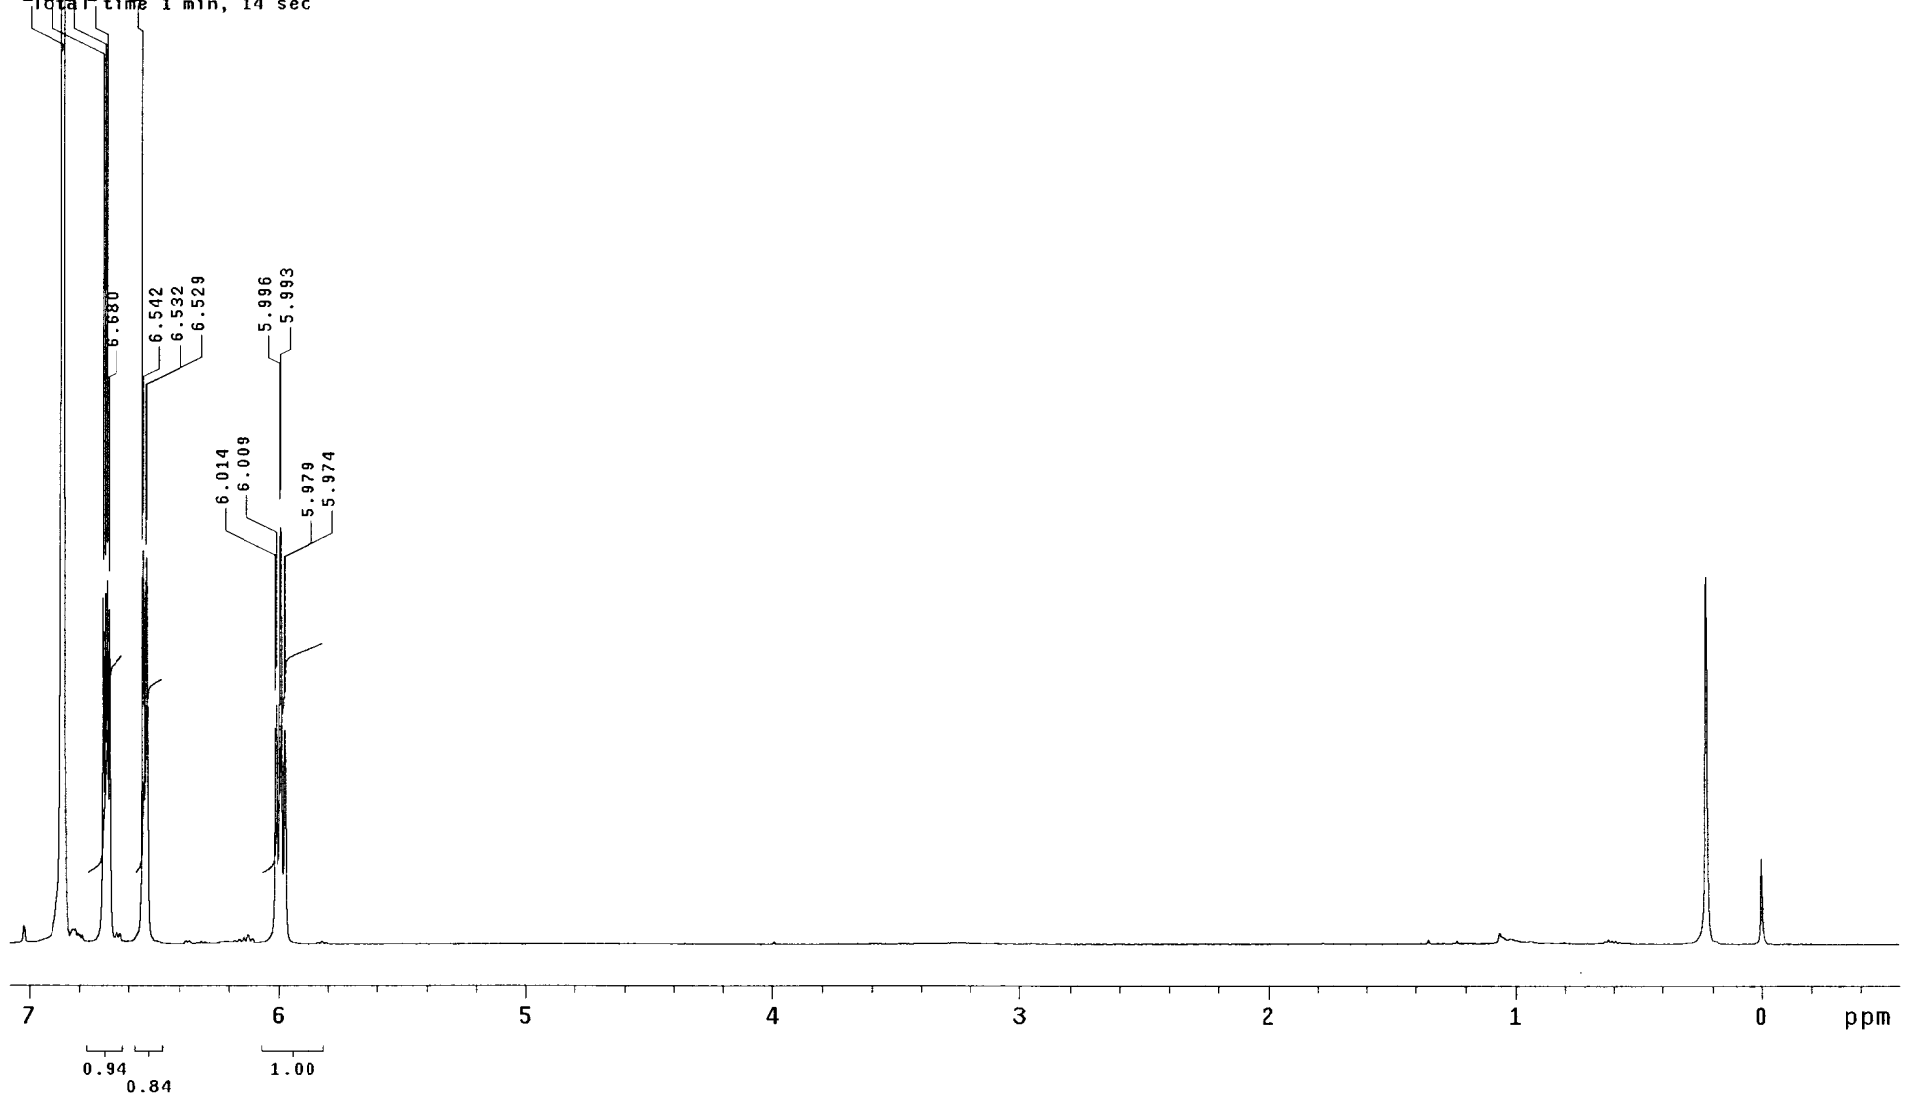

STANDARD CARBON PARAMETERS

Pulse Sequence: s2pu1  
Solvent: CDC13  
Temp. 24.0 C / 297.1 K  
User: 1-14-87  
INOVA-500 "inova500c"

Pulse 30.0 degrees  
Acq. time 1.092 sec  
Width 29996.3 Hz  
1152 repetitions  
OBSERVE C13, 125.6928044 MHz  
DECOUPLE H1, 499.8741814 MHz  
Power 48 dB  
continuously on  
WALTZ-16 modulated  
DATA PROCESSING  
Line broadening 1.0 Hz  
FT size 65536  
Total time 1 hr, 15 min, 13 sec

Filename: \_

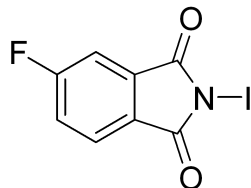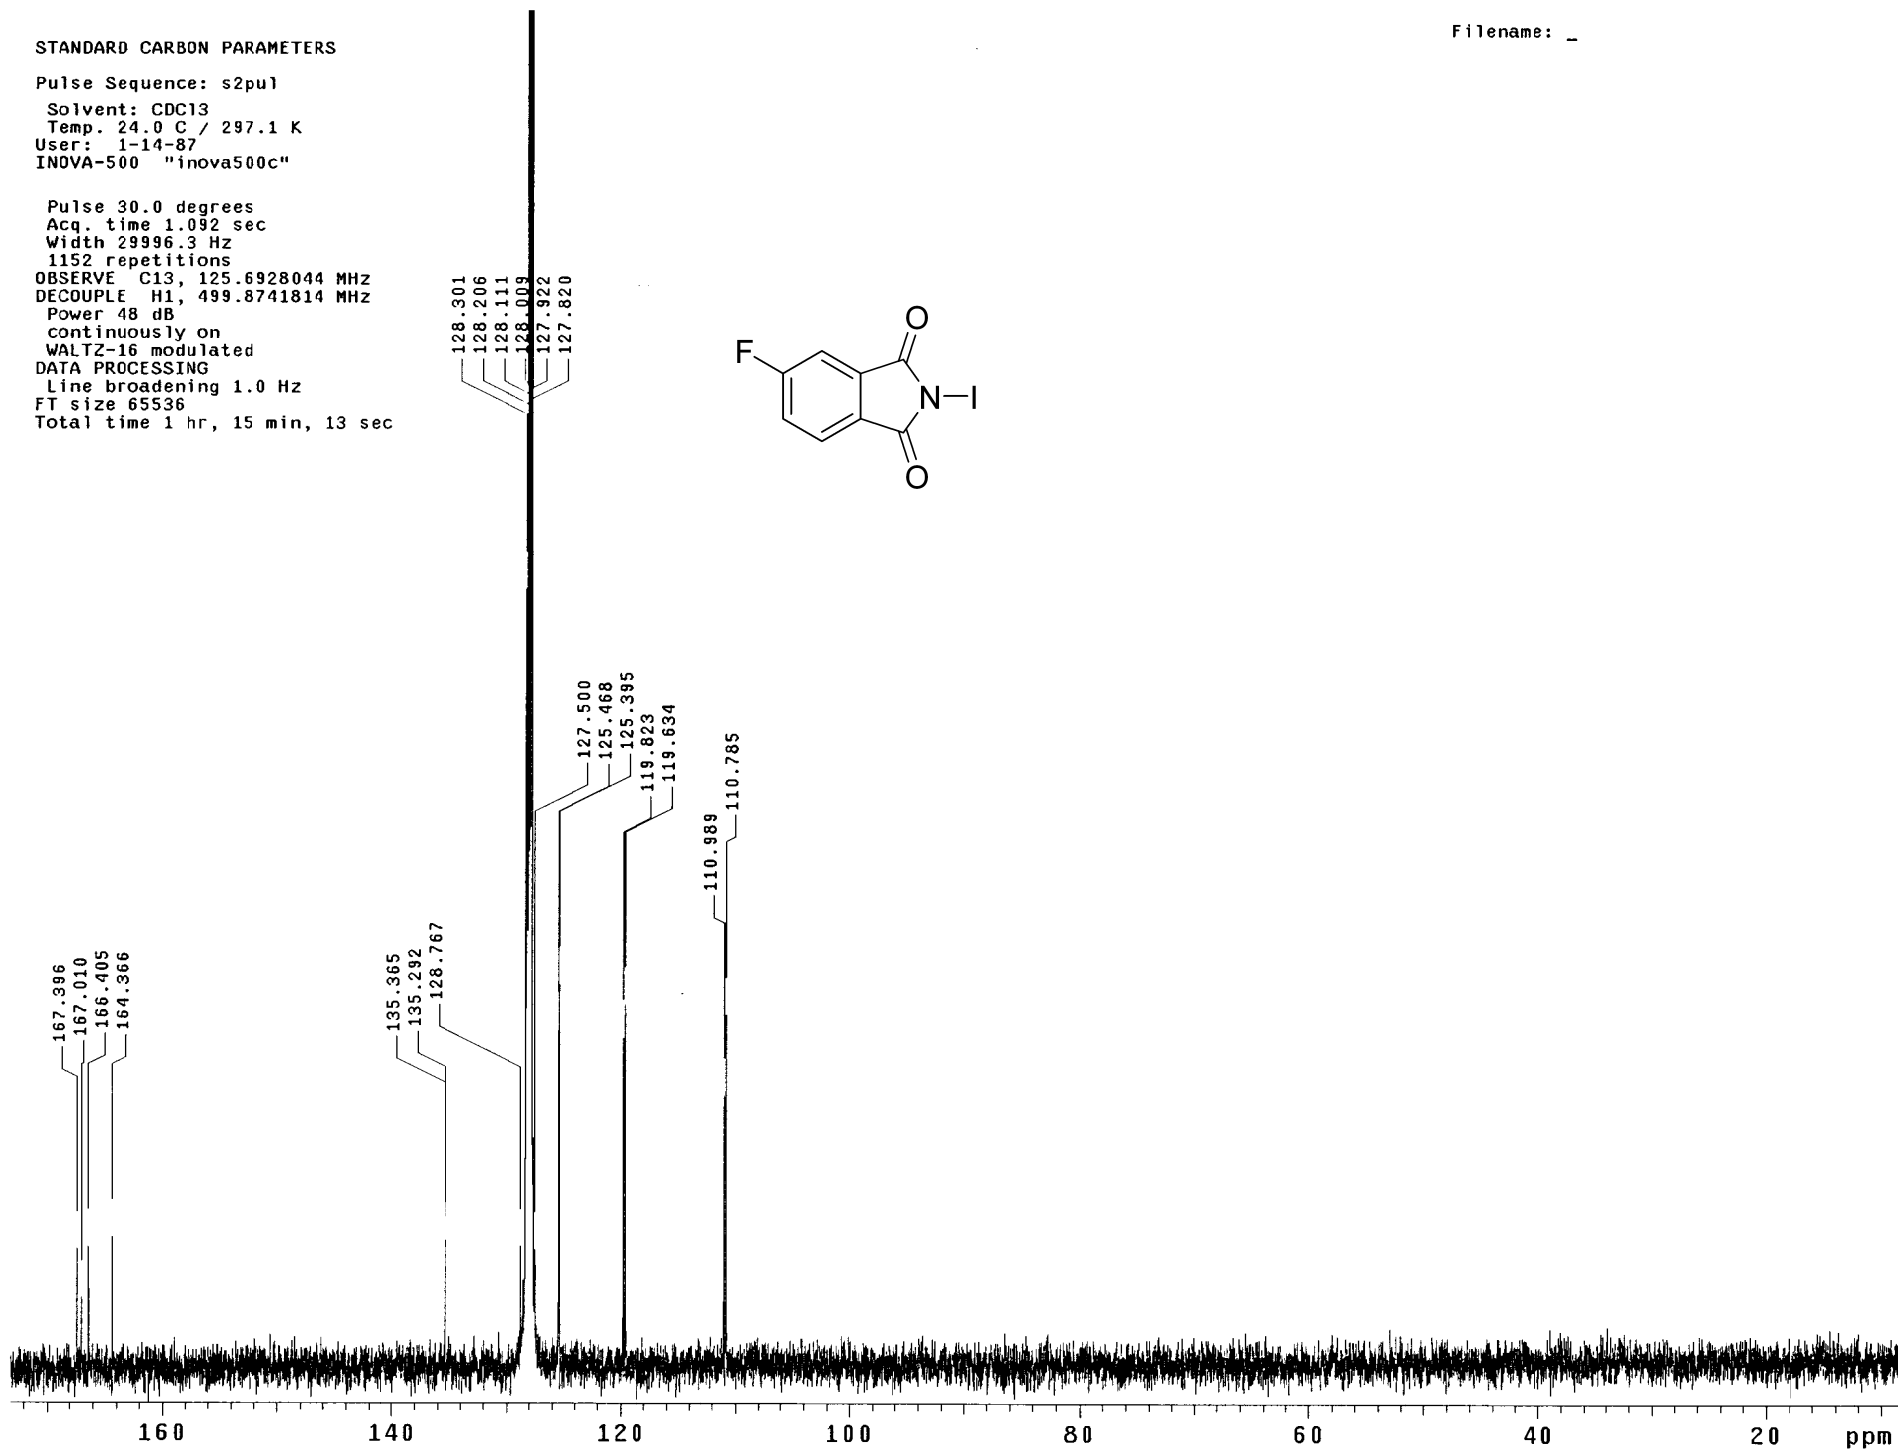

5-phenylhex-5-enoic acid

Filename: \_

Pulse Sequence: s2pu1

Solvent: CDC13  
Temp. 24.0 C / 297.1 K  
INOVA-500 "inova500c"

Relax. delay 10.000 sec  
Pulse 54.0 degrees  
Acq. time 2.184 sec  
Width 7501.2 Hz  
16 repetitions  
OBSERVE H1, 499.8716820 MHz  
DATA PROCESSING  
Line broadening 1.1 Hz  
FT size 32768  
Total time 6 min, 54 sec

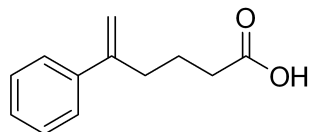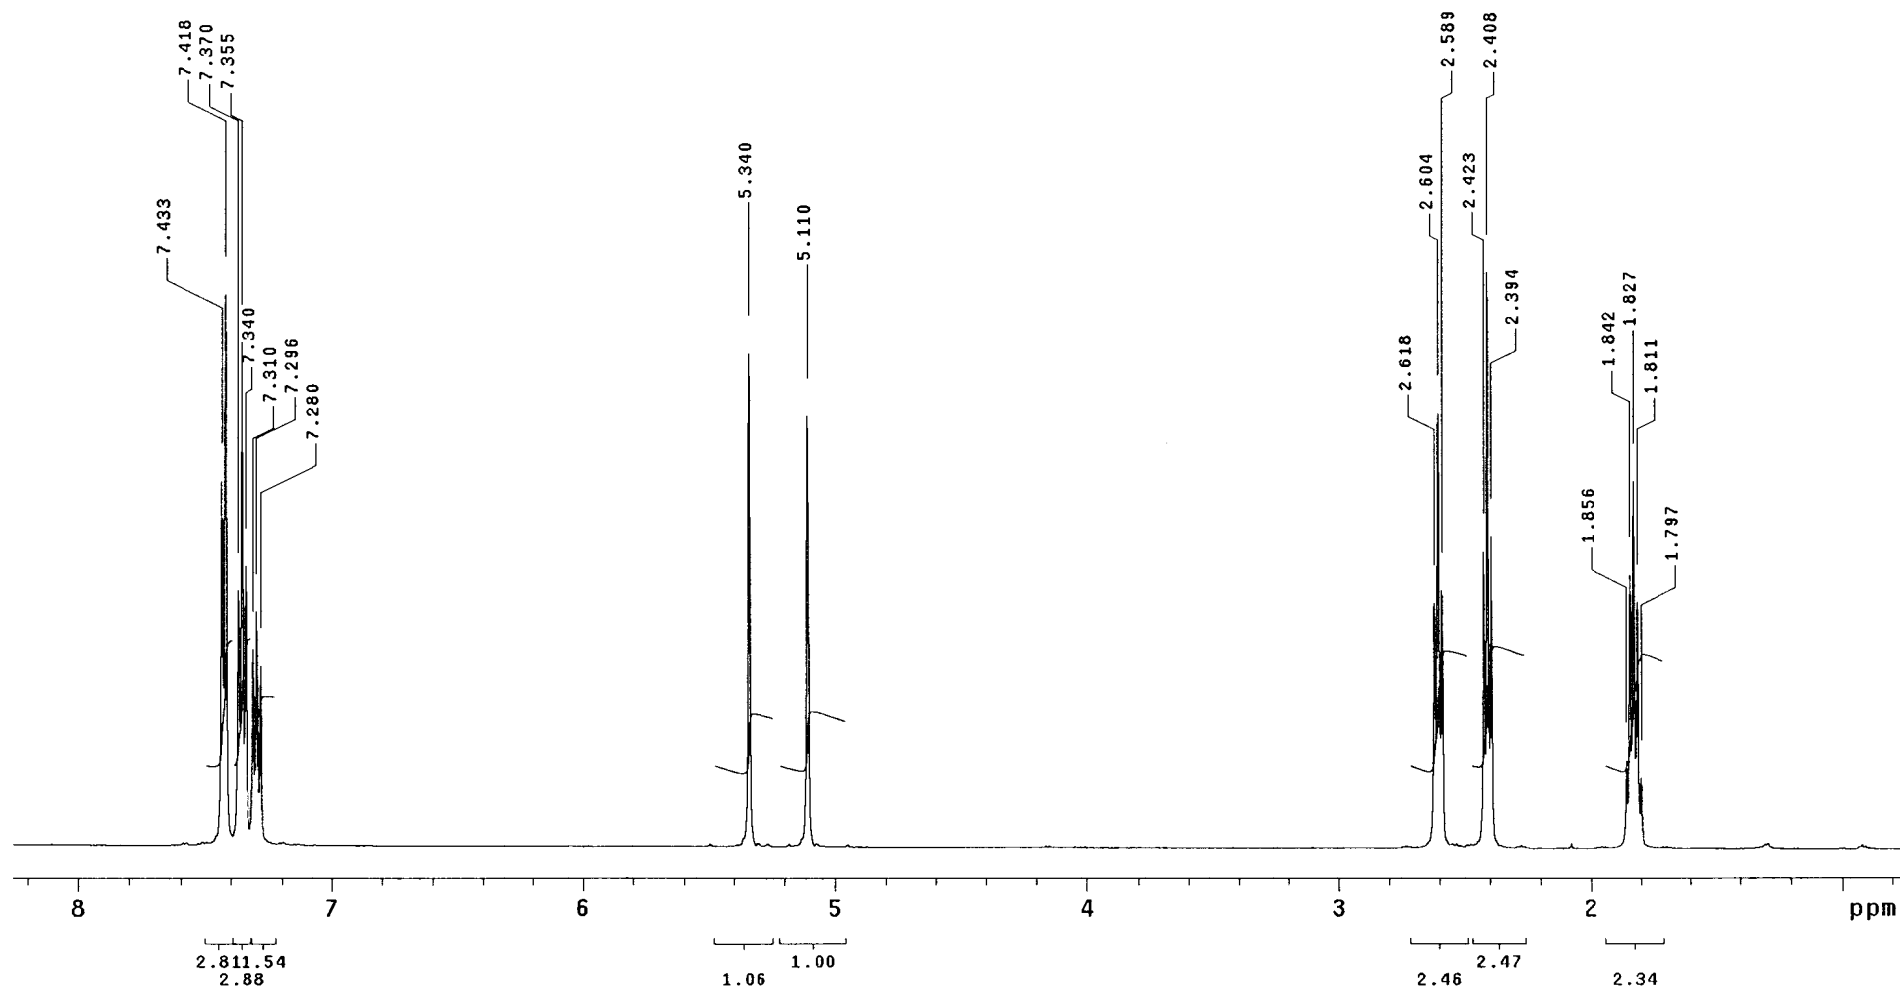

5-phenylhex-5-enoic acid

Pulse Sequence: s2pu1  
Solvent: CDC13  
Temp. 24.0 C / 297.1 K  
User: 1-14-87  
INOVA-500 "inova500c"

Pulse 30.0 degrees  
Acq. time 1.092 sec  
Width 29996.3 Hz  
352 repetitions  
OBSERVE C13, 125.6928044 MHZ  
DECOUPLE H1, 499.8741814 MHZ  
Power 48 dB  
continuously on  
WALTZ-16 modulated  
DATA PROCESSING  
Line broadening 1.0 Hz  
FT size 65536  
Total time 37 min, 37 sec

Filename: \_

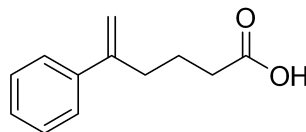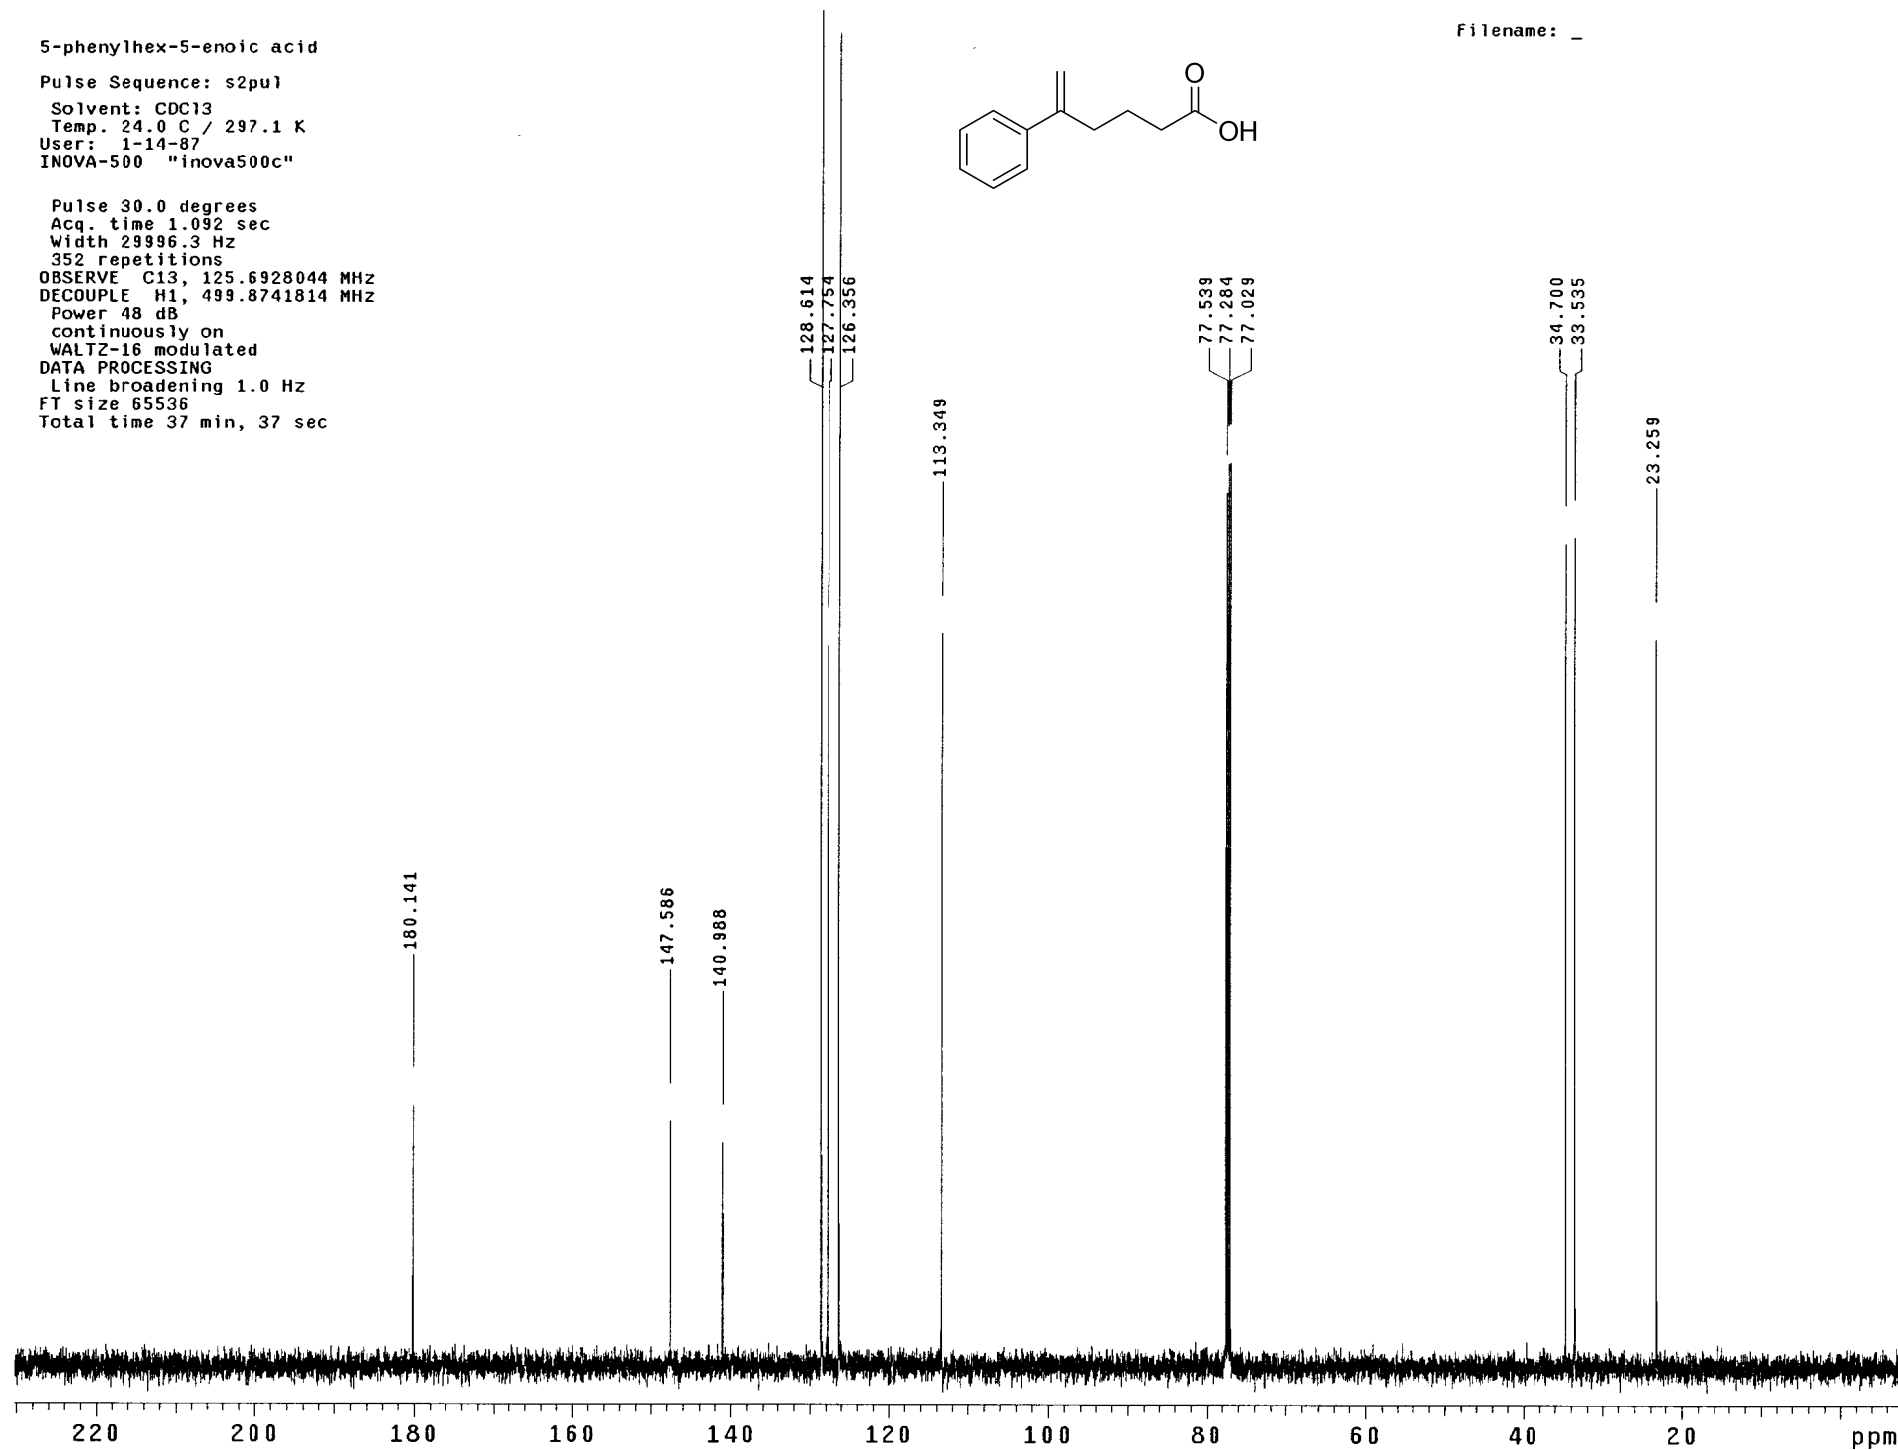



methyl

Filename: \_

Pulse Sequence: s2pu1  
Solvent: CDC13  
Temp. 24.0 C / 297.1 K  
INOVA-500 "inova500c"

Relax. delay 10.000 sec  
Pulse 54.0 degrees  
Acq. time 2.184 sec  
Width 7501.2 Hz  
4 repetitions  
OBSERVE H1, 499.8716820 MHz  
DATA PROCESSING  
Line broadening 1.1 Hz  
FT size 32768  
Total time 1 min, 13 sec

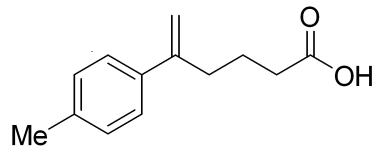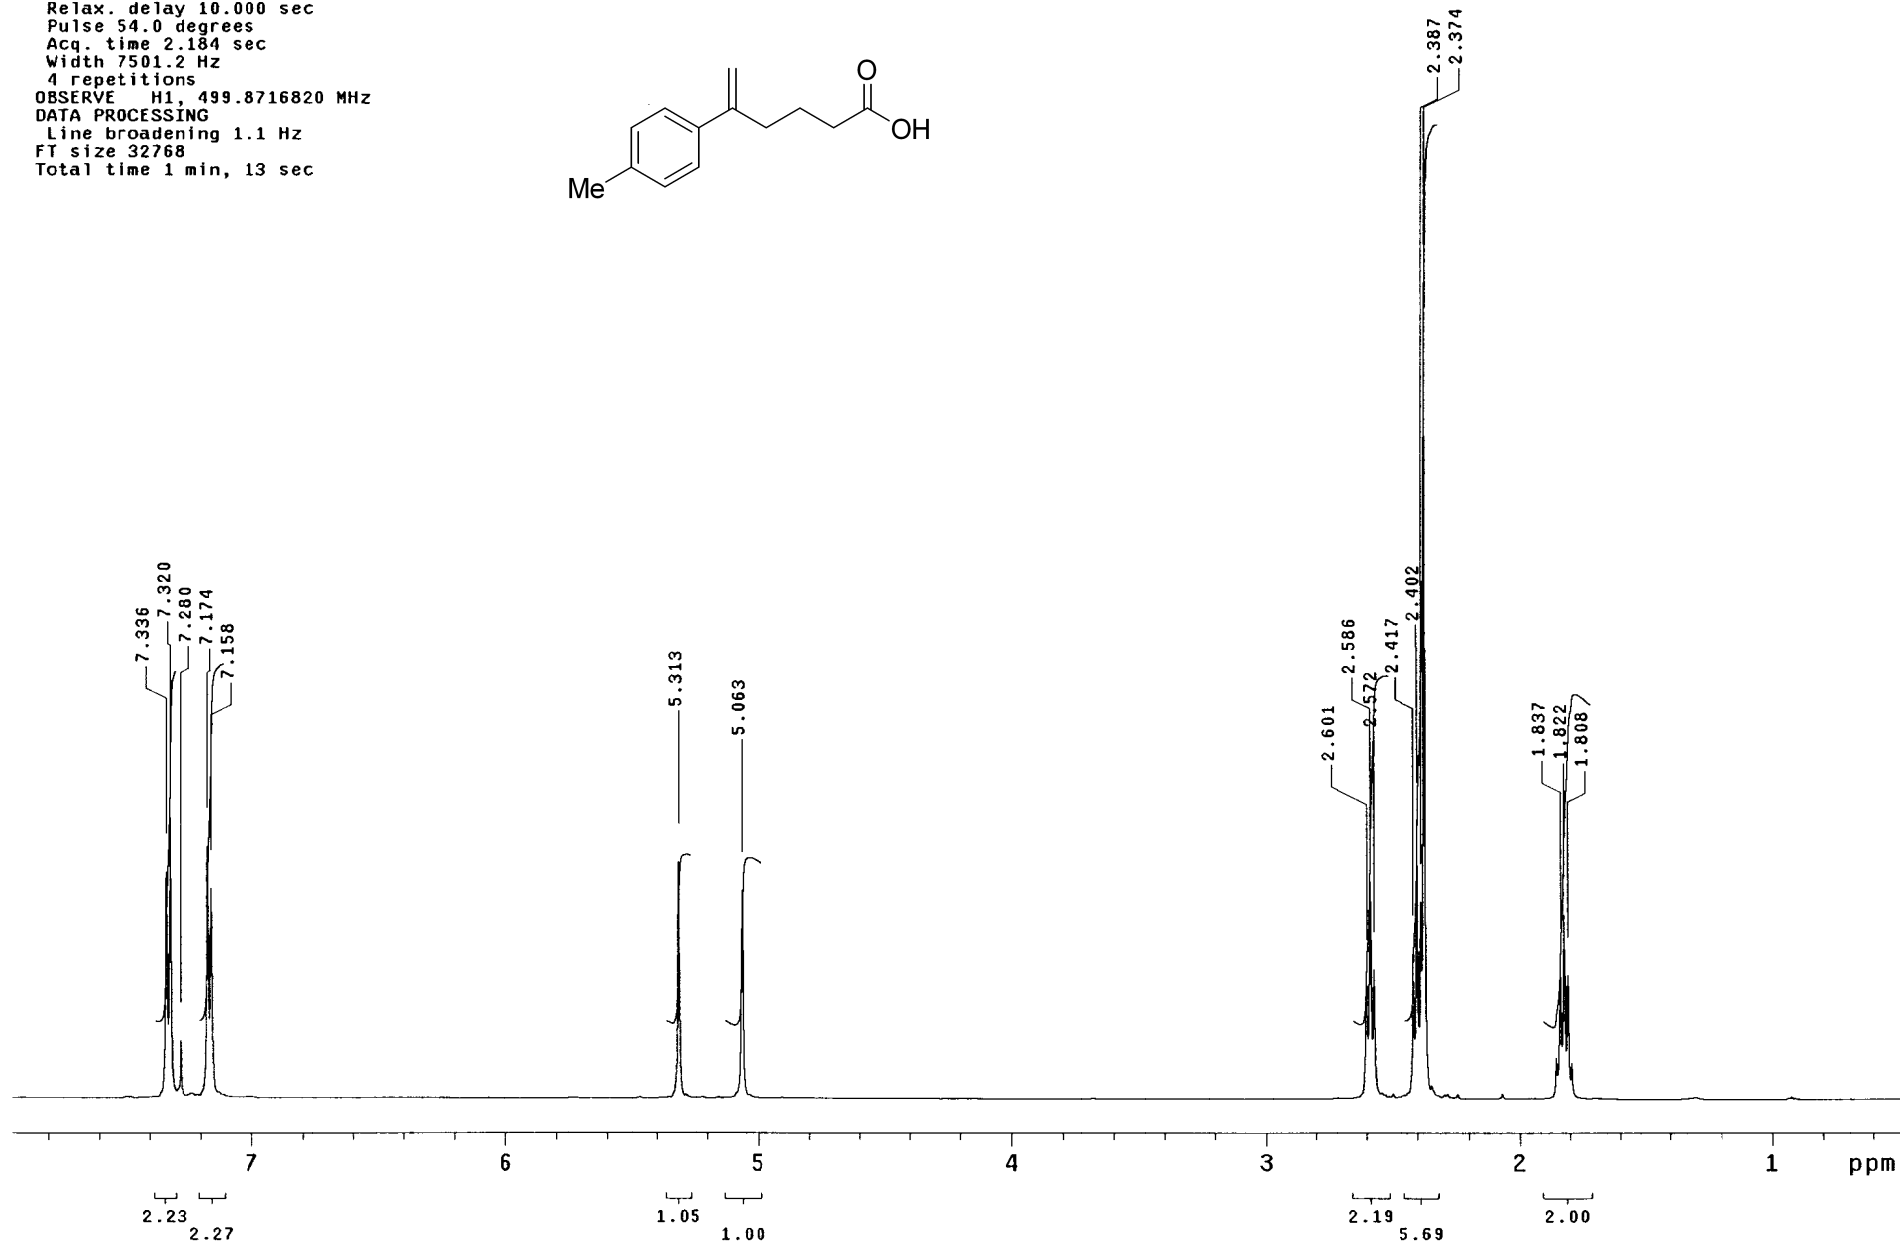

methyl

Pulse Sequence: s2pu1

Solvent: CDC13  
 Temp. 24.0 C / 297.1 K  
 User: 1-14-87  
 INOVA-500 "inova500c"

Pulse 30.0 degrees  
 Acq. time 1.092 sec  
 Width 29996.3 Hz  
 288 repetitions  
 OBSERVE C13, 125.6928044 MHz  
 DECOUPLE H1, 499.8741814 MHz  
 Power 48 dB  
 continuously on  
 WALTZ-16 modulated  
 DATA PROCESSING  
 Line broadening 1.0 Hz  
 FT size 65536  
 Total time 37 min, 37 sec

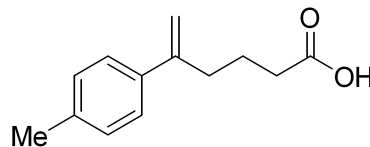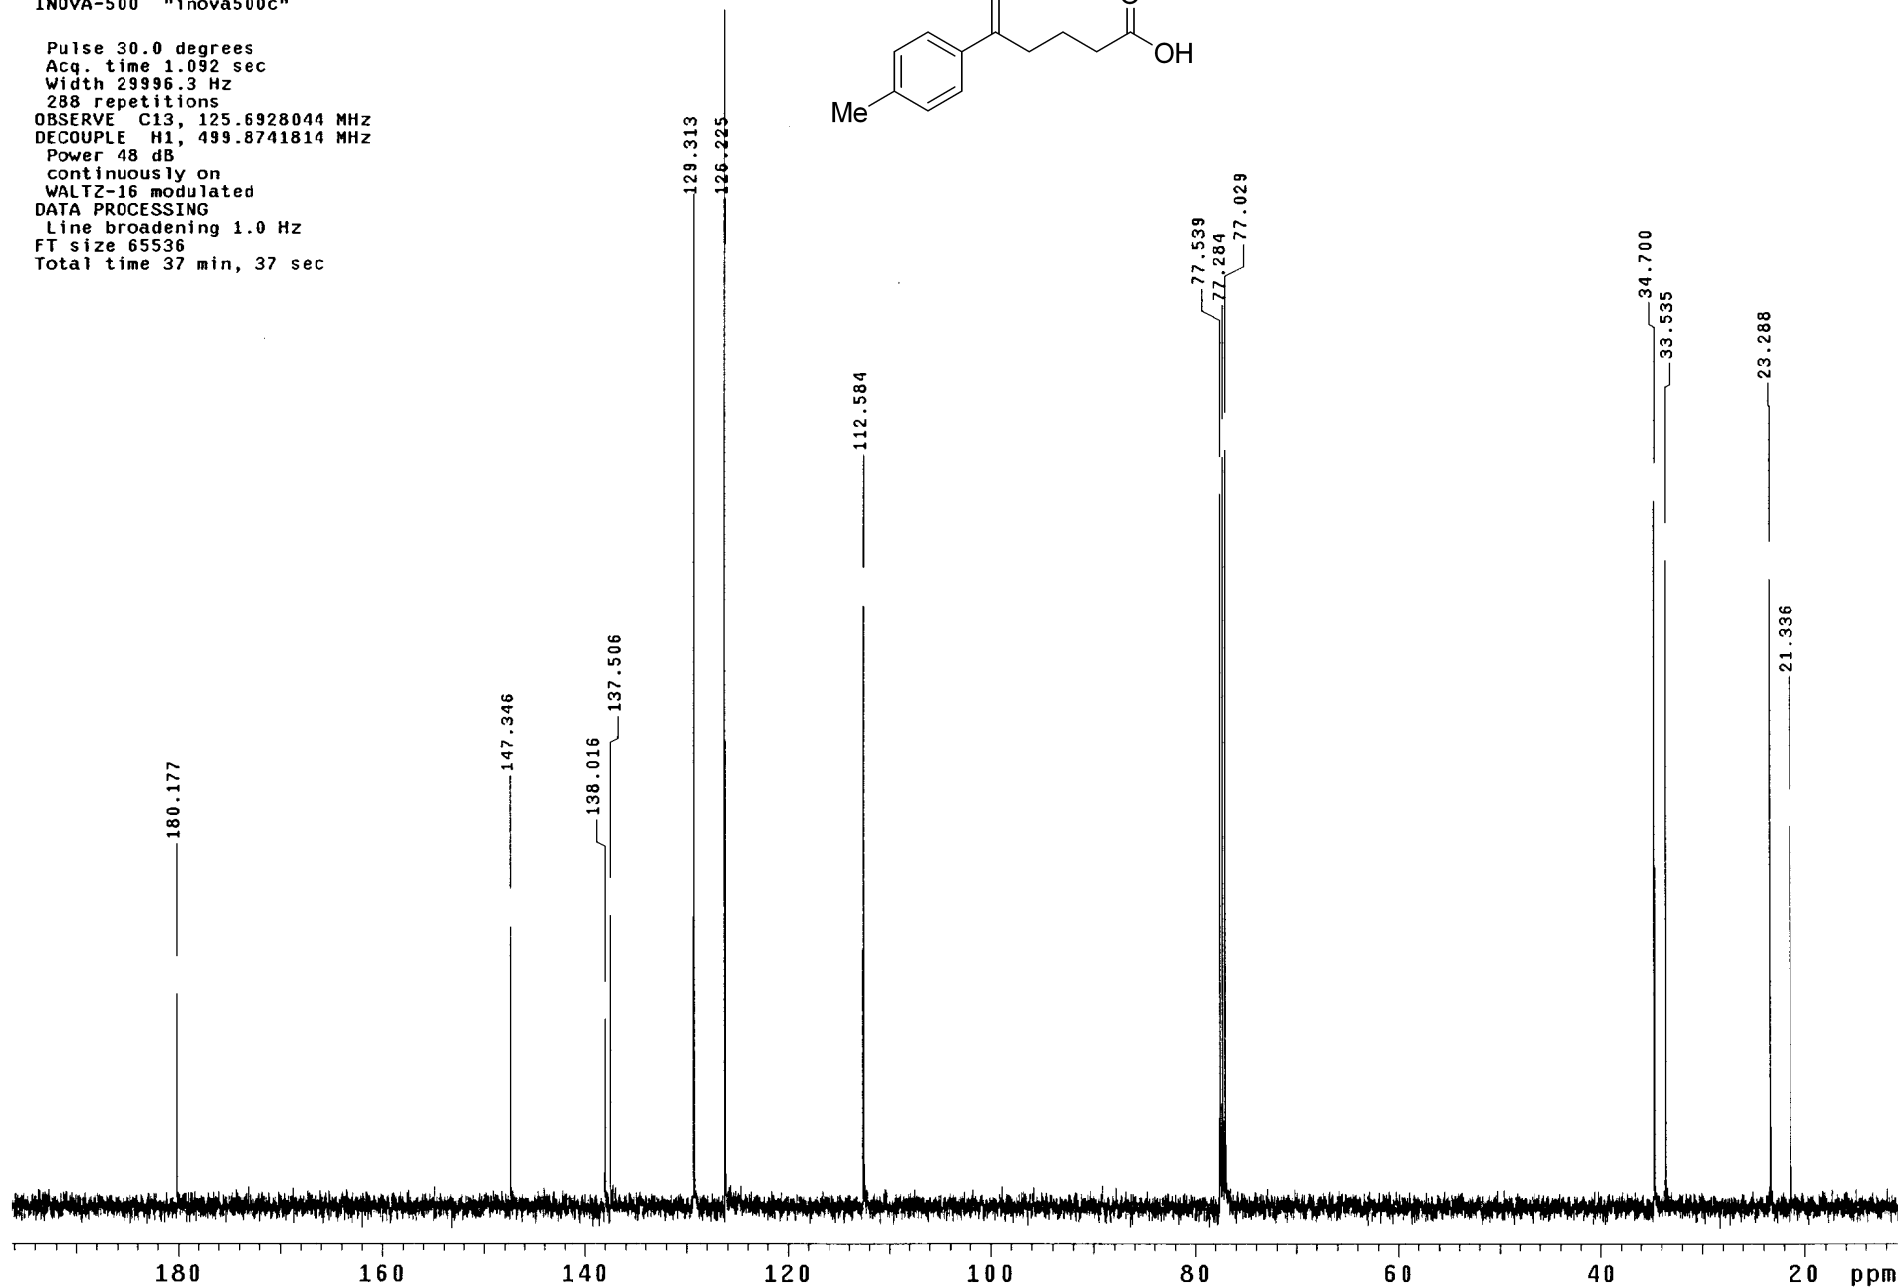

2naphthyl

Pulse Sequence: s2pu1  
 Solvent: CDC13  
 Temp. 24.0 C / 297.1 K  
 INOVA-500 "inova500c"

Relax. delay 10.000 sec  
 Pulse 54.0 degrees  
 Acq. time 2.184 sec  
 Width 7501.2 Hz  
 4 repetitions  
 OBSERVE H1, 499.8716820 MHz  
 DATA PROCESSING  
 Line broadening 1.1 Hz  
 FT size 32768  
 Total time 1 min, 13 sec

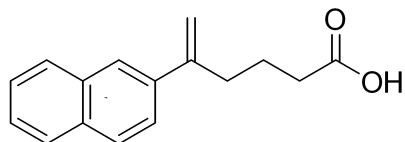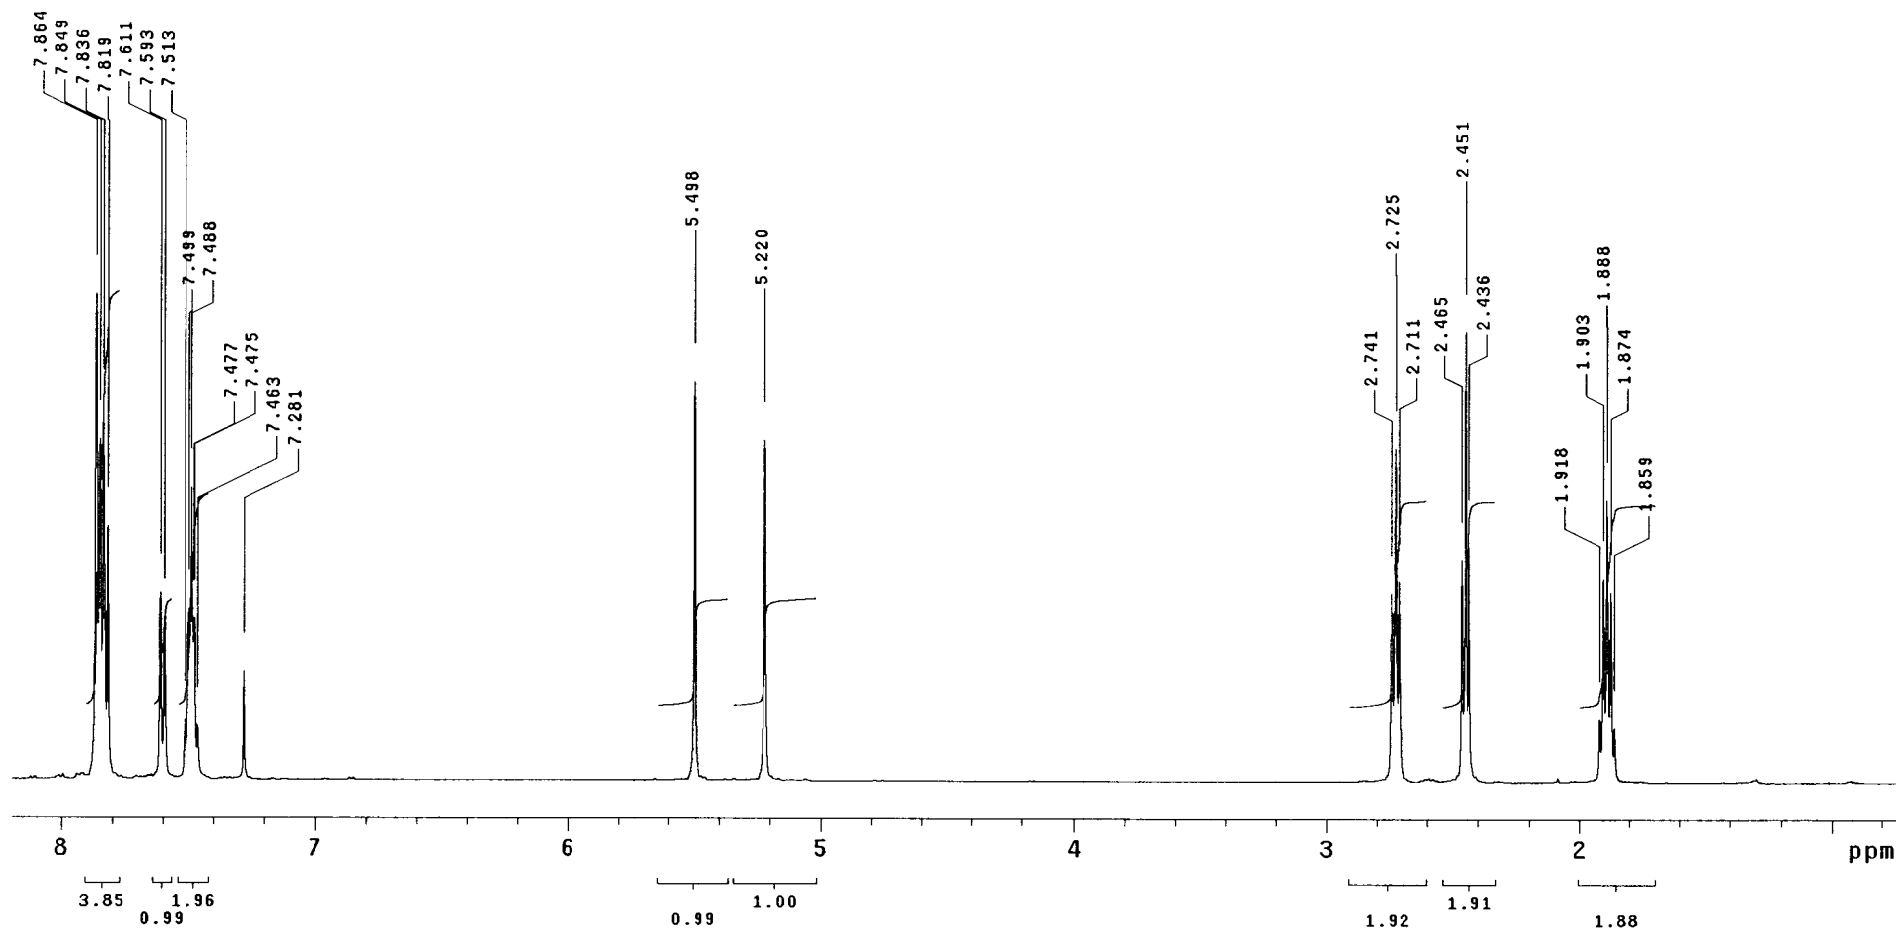

naphthyl

Pulse Sequence: s2pu1

Solvent: CDC13  
Temp. 24.0 C / 297.1 K  
User: 1-14-87  
INOVA-500 "inova500c"

Pulse 30.0 degrees  
Acq. time 1.092 sec  
Width 29996.3 Hz  
128 repetitions  
OBSERVE C13, 125.6928044 MHz  
DECOUPLE H1, 499.8741814 MHz  
Power 48 dB  
continuously on  
WALTZ-16 modulated  
DATA PROCESSING  
Line broadening 1.0 Hz  
FT size 65536  
Total time 37 min, 37 sec

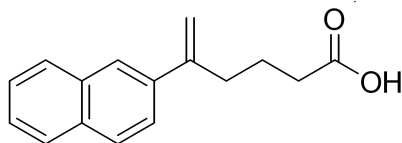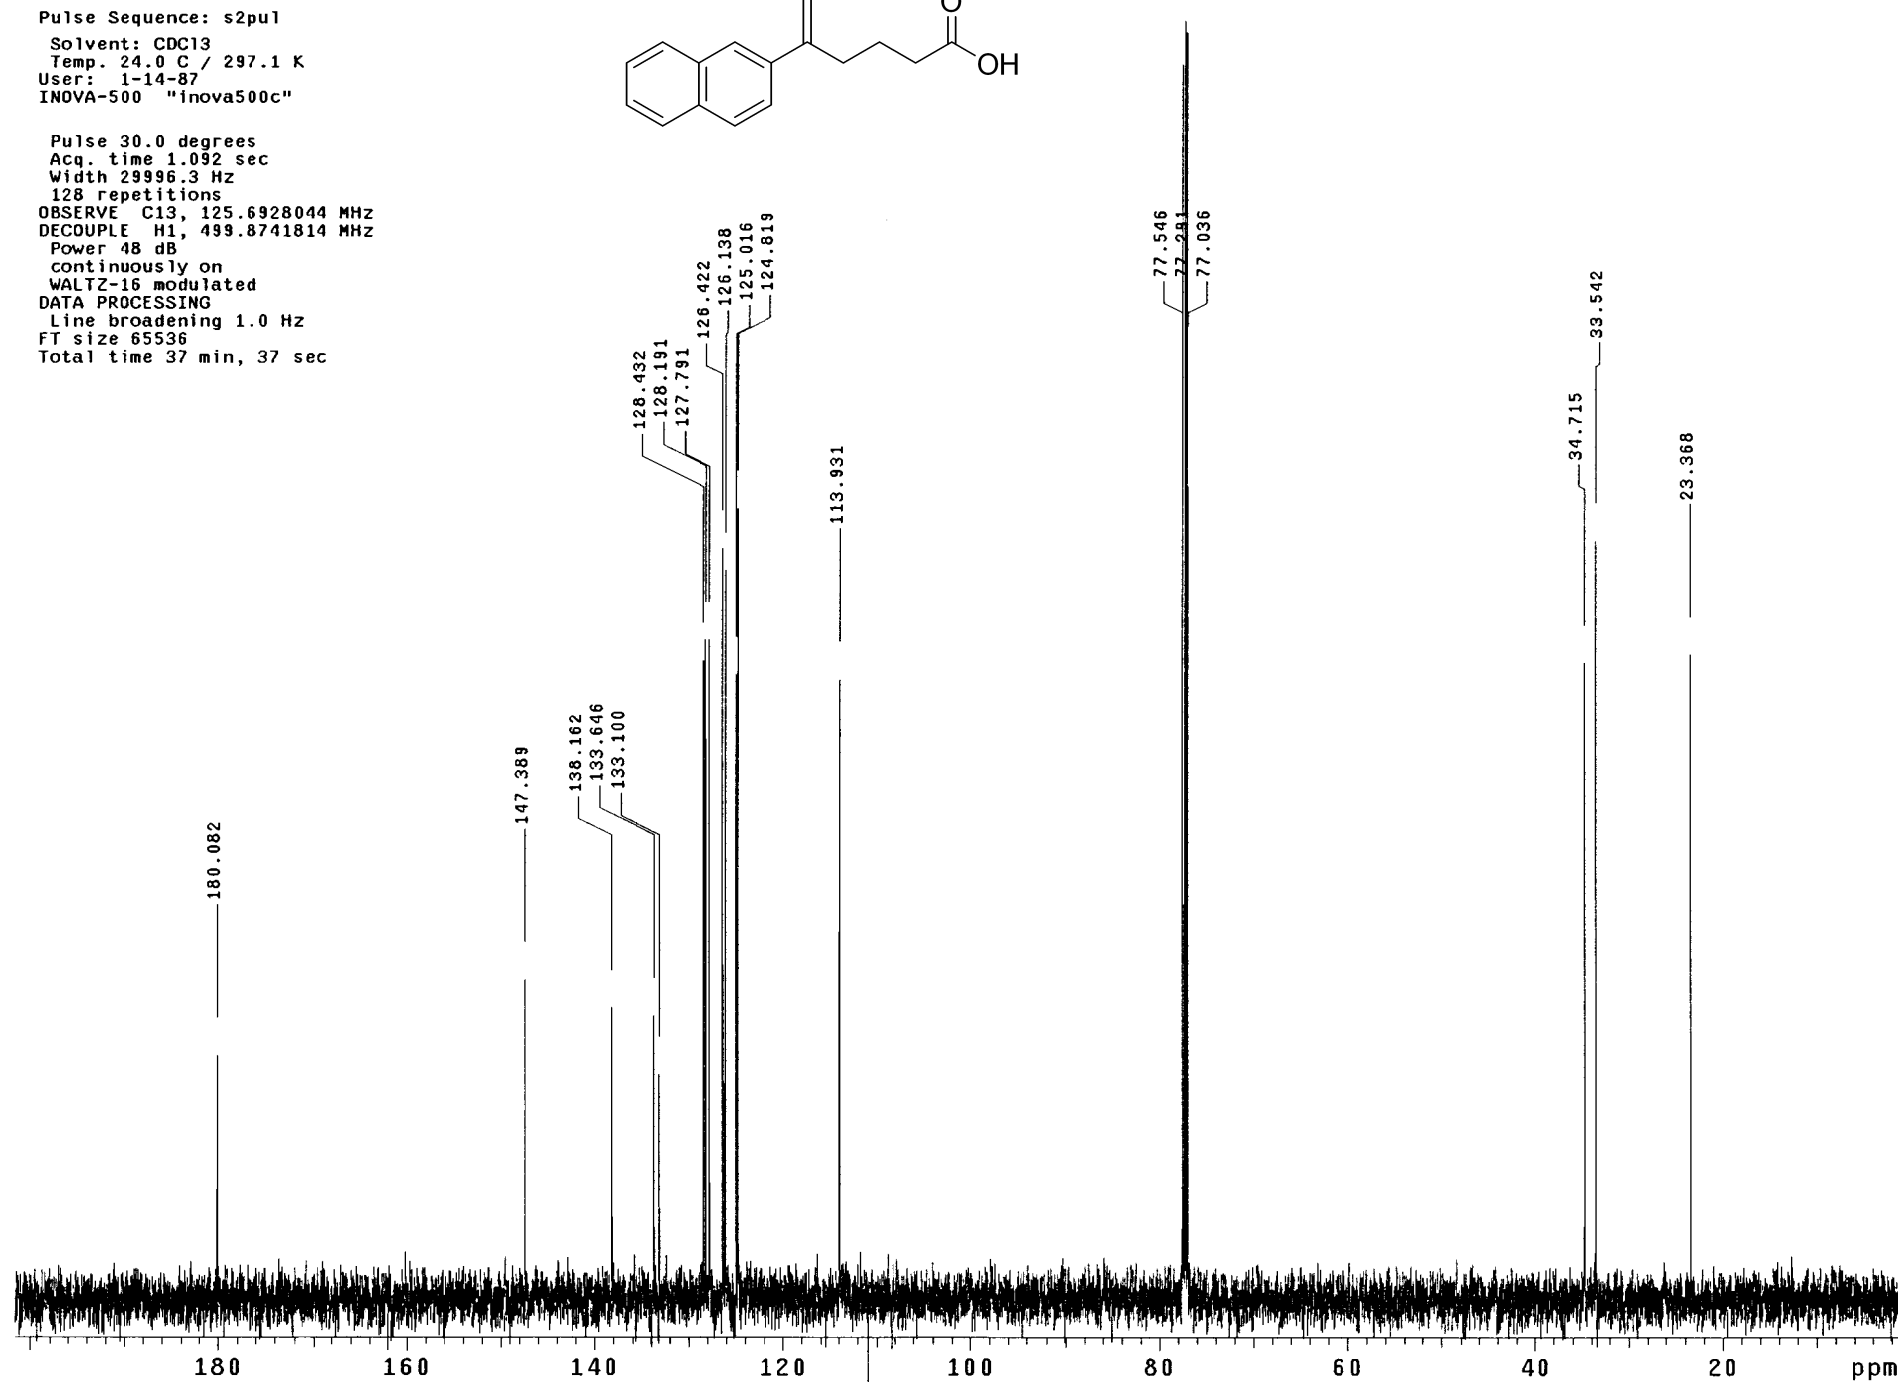

methoxy

Pulse Sequence: s2pu1

Solvent: CDC13

Temp. 24.0 C / 297.1 K

INOVA-500 "inova500c"

Relax. delay 10.000 sec

Pulse 54.0 degrees

Acq. time 2.184 sec

Width 7501.2 Hz

4 repetitions

OBSERVE H1, 499.8716820 MHz

DATA PROCESSING

Line broadening 1.1 Hz

FT size 32768

Total time 1 min, 13 sec

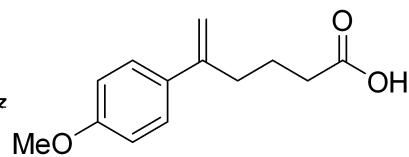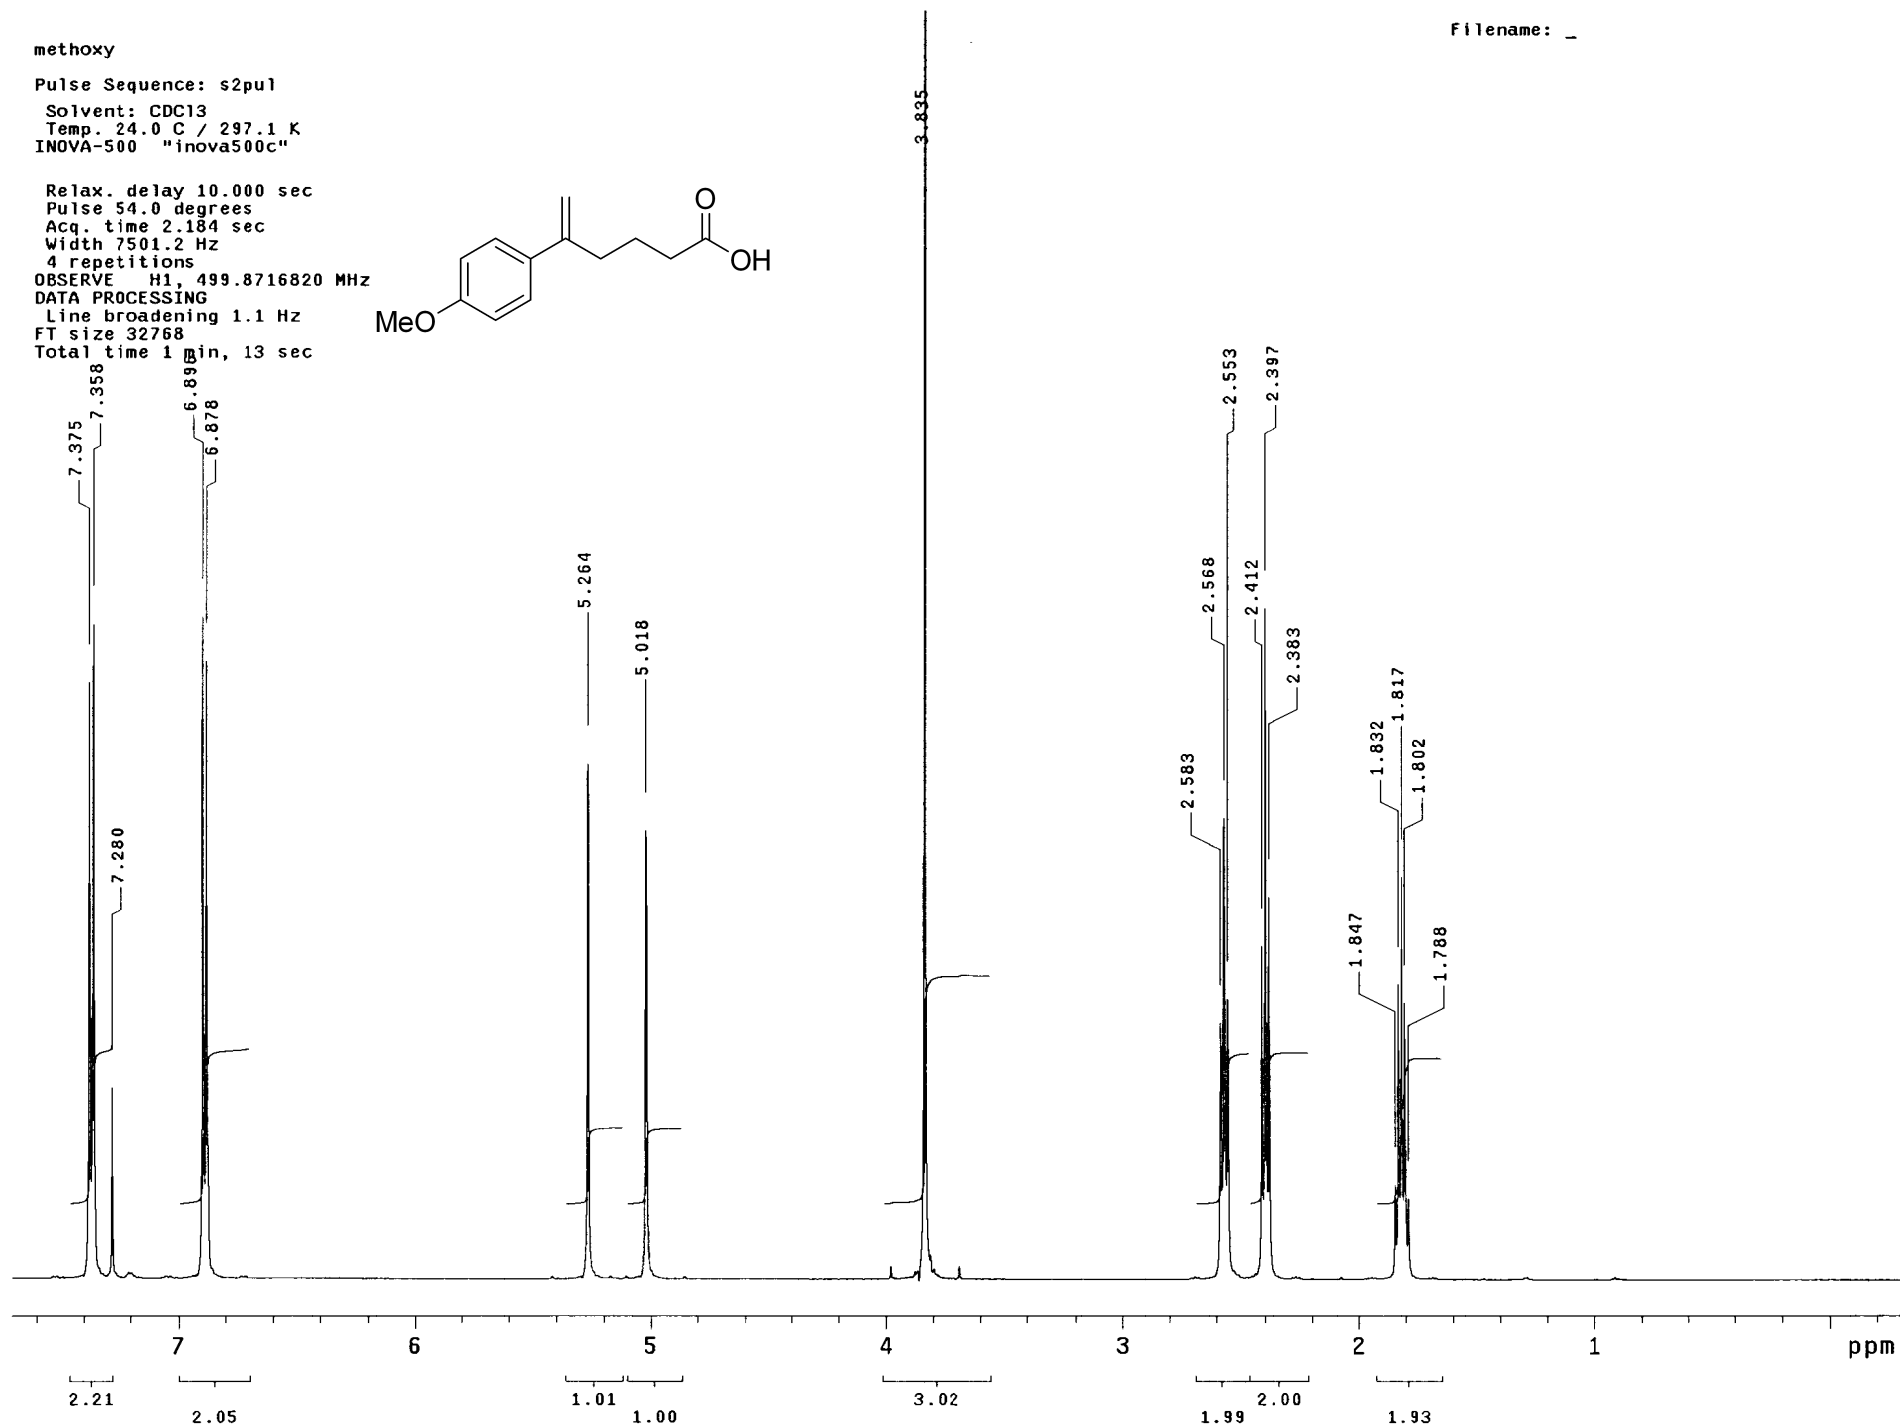

Filename: \_

6methoxy

Pulse Sequence: s2pul  
 Solvent: CDC13  
 Temp. 24.0 C / 297.1 K  
 User: 1-14-87  
 INOVA-500 "inova500c"

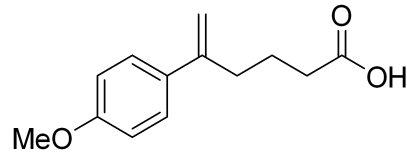

Pulse 30.0 degrees  
 Acq. time 1.092 sec  
 Width 29996.3 Hz  
 256 repetitions  
 OBSERVE C13, 125.6928044 MHz  
 DECOUPLE H1, 499.8741814 MHz  
 Power 48 dB  
 continuously on  
 WALTZ-16 modulated  
 DATA PROCESSING  
 Line broadening 1.0 Hz  
 FT size 65536  
 Total time 37 min, 37 sec

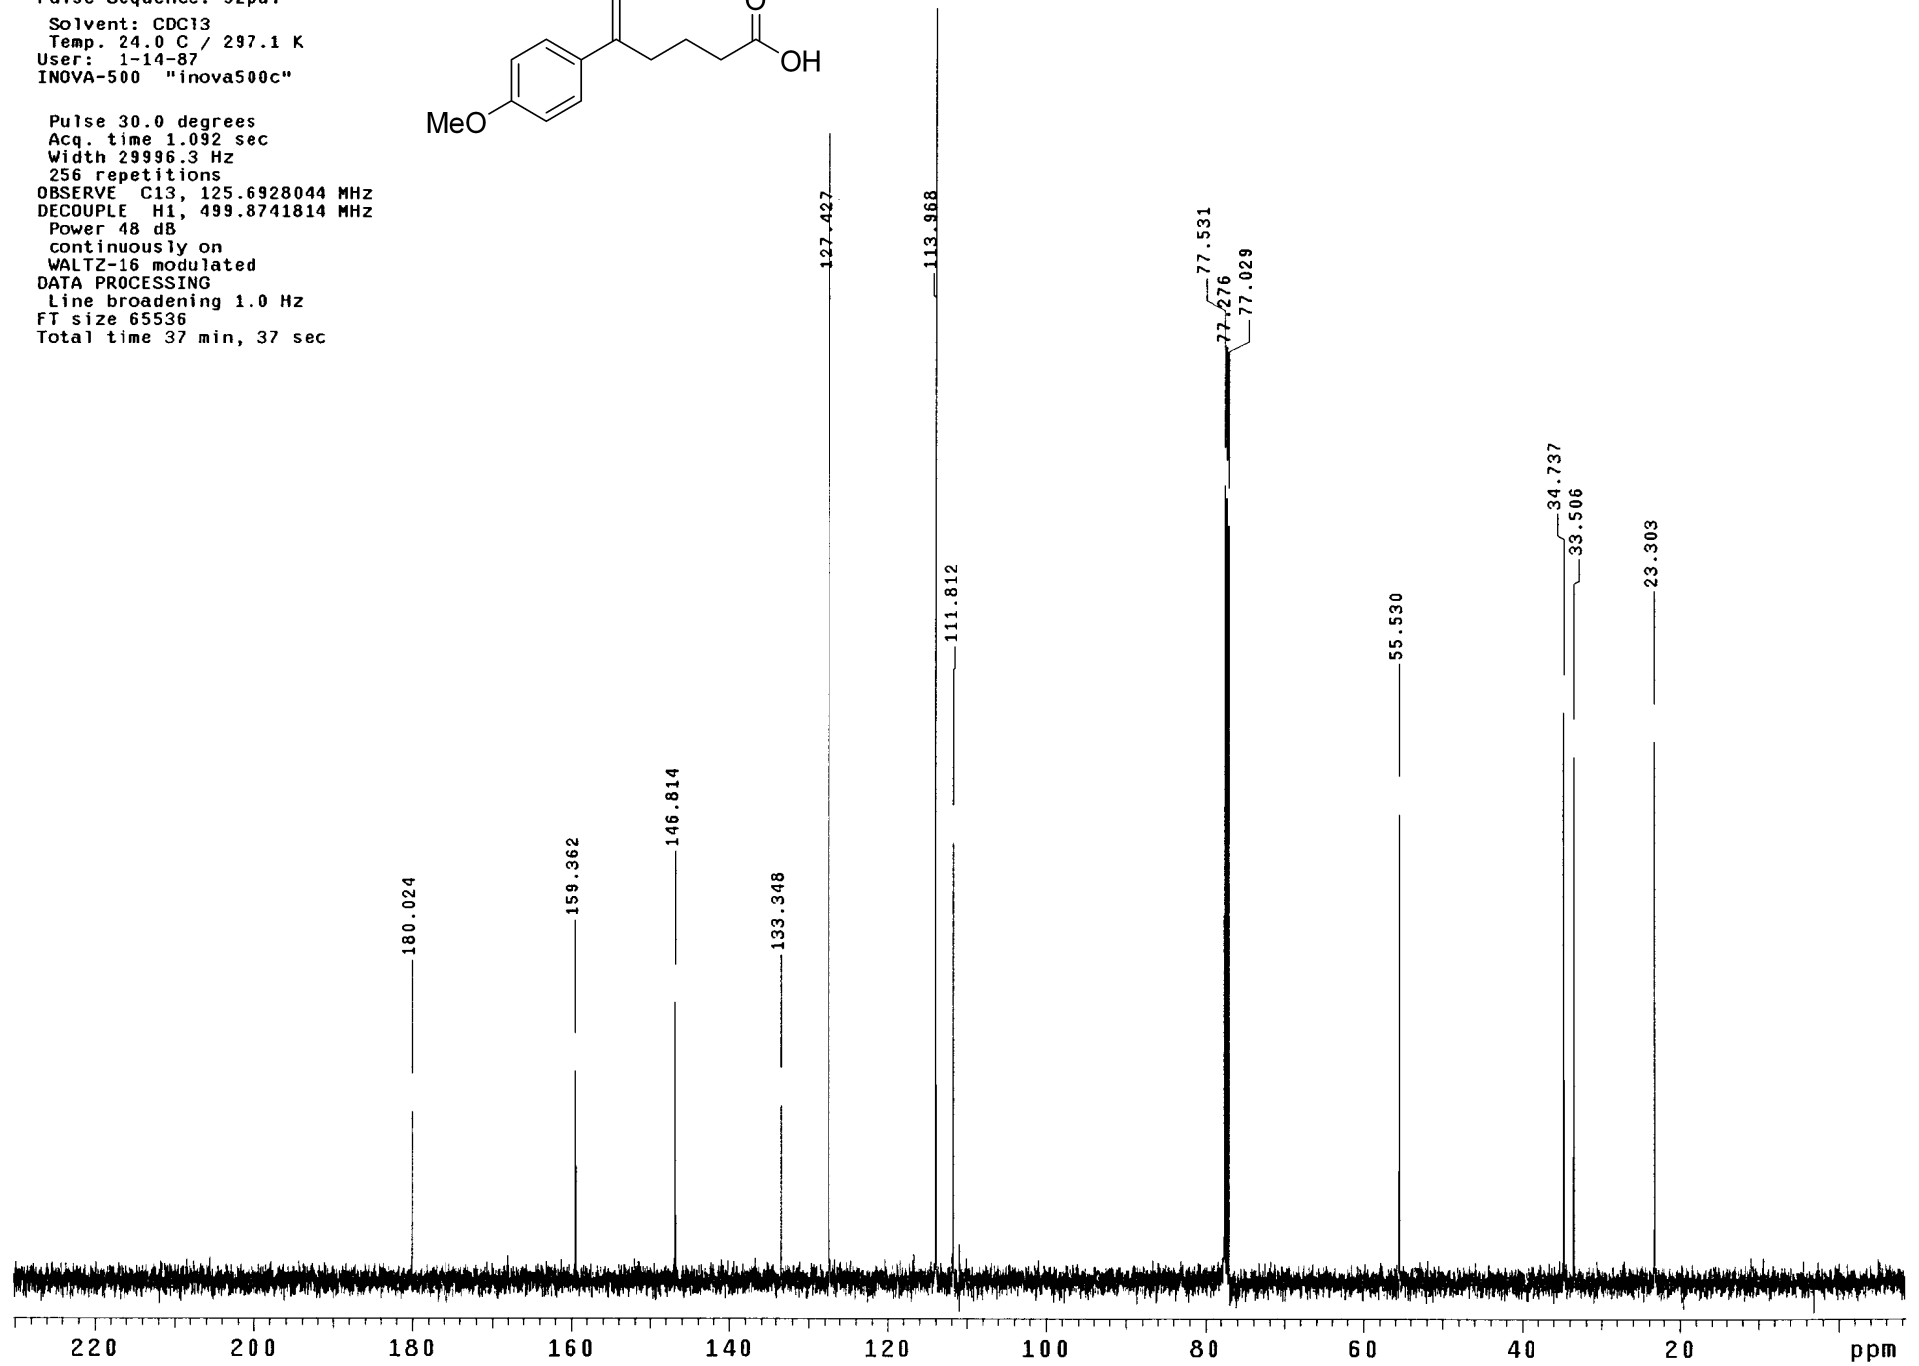

isopropyl ketone

Pulse Sequence: s2pu1

Solvent: CDC13

Temp. 24.0 C / 297.1 K

INNOVA-500 "inova500c"

Pulse 54.0 degrees

Acq. time 2.184 sec

Width 7501.2 Hz

4 repetitions

OBSERVE H1, 499.8716820 MHz

DATA PROCESSING

Line broadening 1.1 Hz

FT size 32768

Total time 0 min, 13 sec

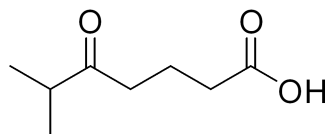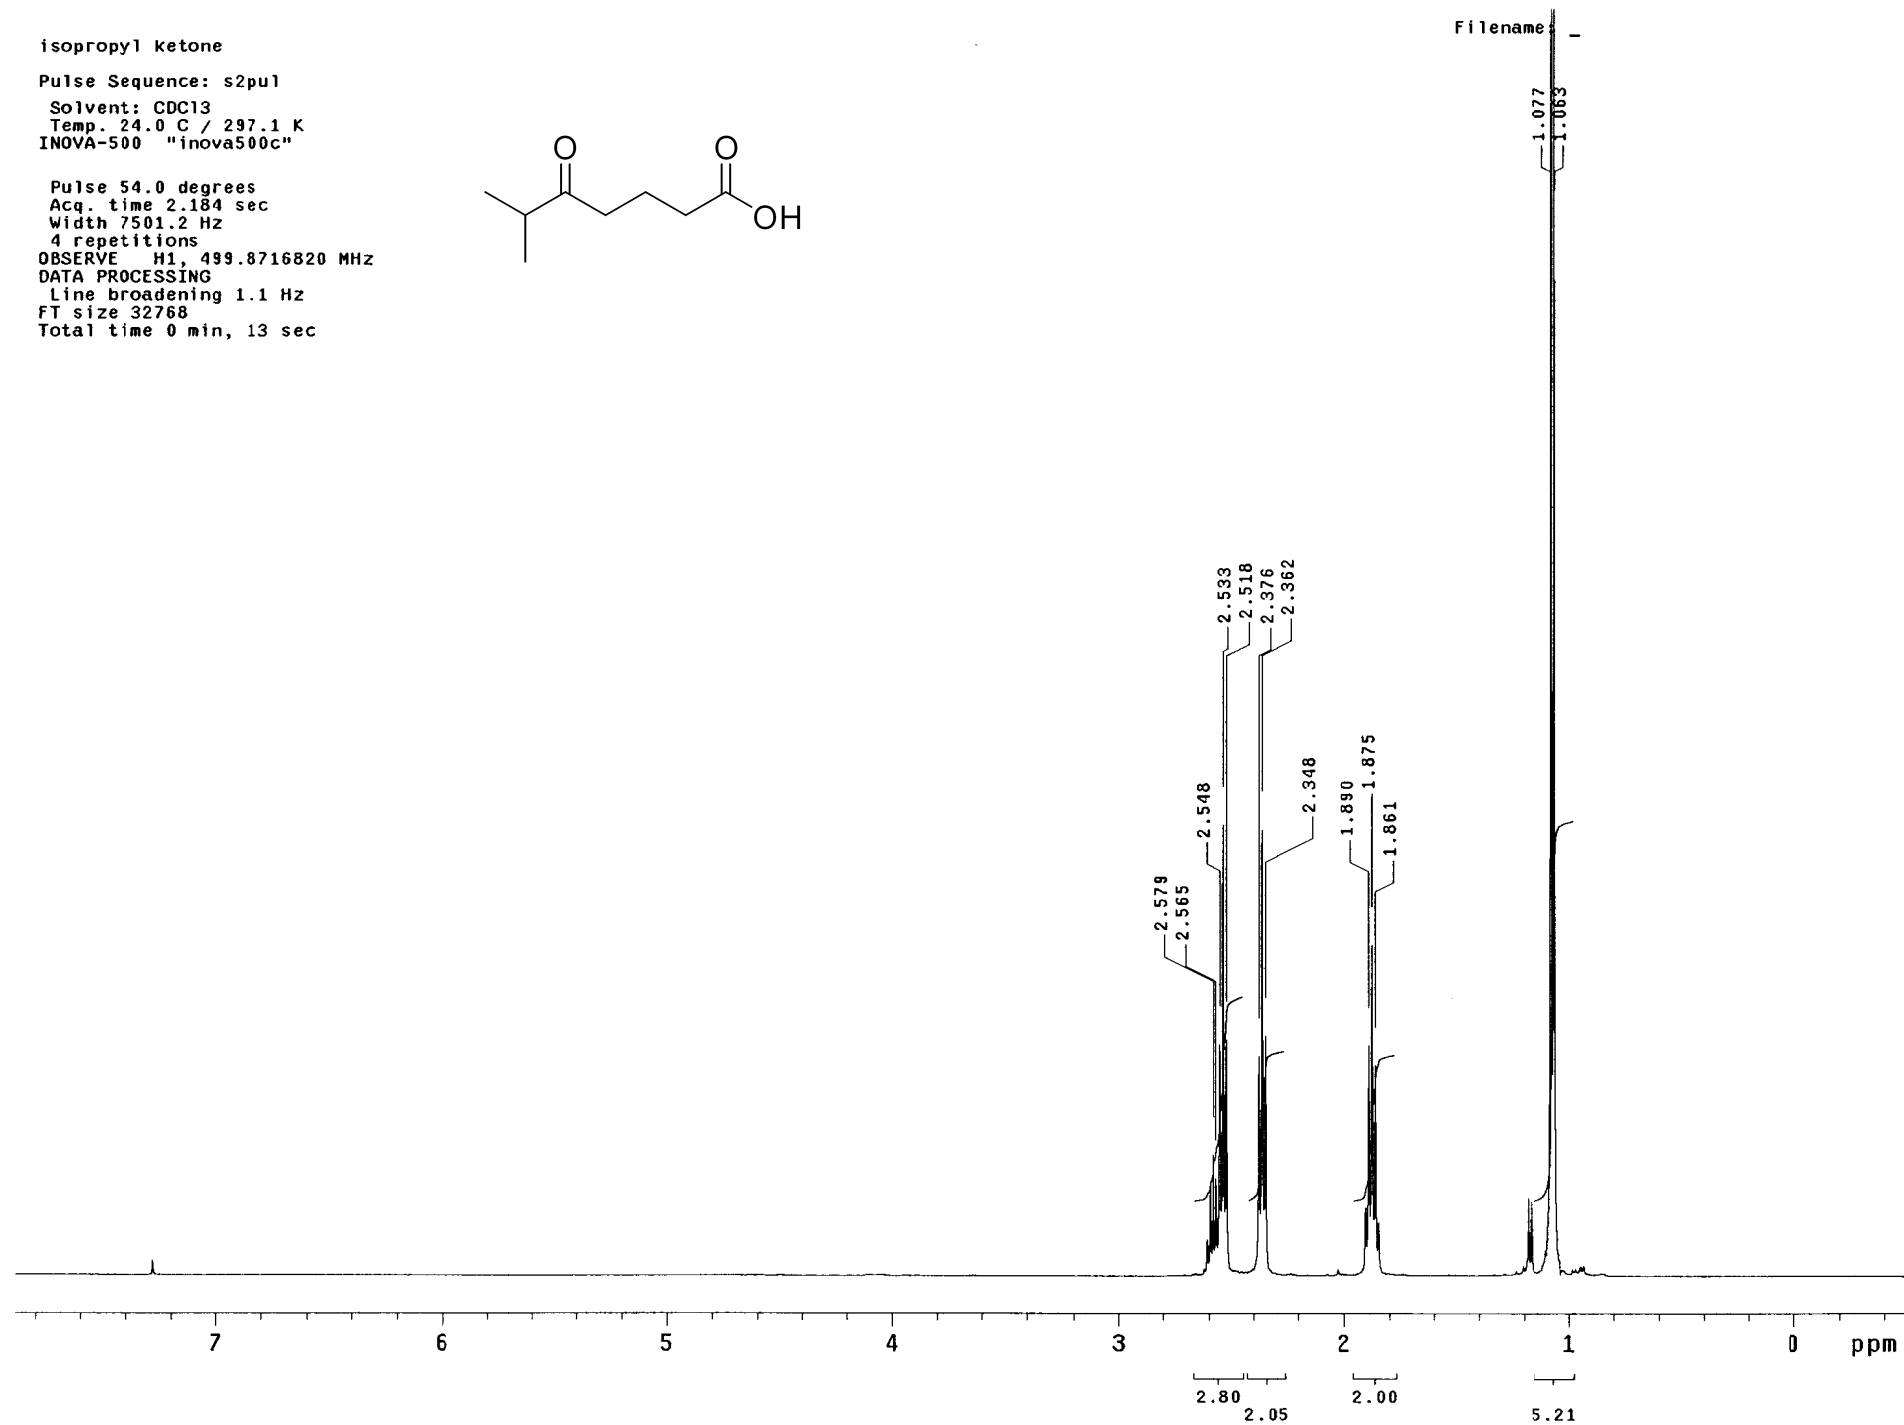

isopropyl ketone

Pulse Sequence: s2pul

Solvent: CDC13  
Temp. 24.0 C / 297.1 K  
User: 1-14-87  
INNOVA-500 "inova500c"

Pulse 30.0 degrees  
Acq. time 1.092 sec  
Width 29996.3 Hz  
128 repetitions  
OBSERVE C13, 125.6928044 MHz  
DECOUPLE H1, 499.8741814 MHz  
Power 48 dB  
continuously on  
WALTZ-16 modulated  
DATA PROCESSING  
Line broadening 1.0 Hz  
FT size 65536  
Total time 37 min, 37 sec

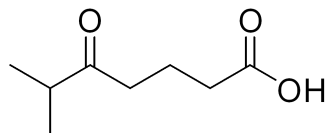

Filename: \_

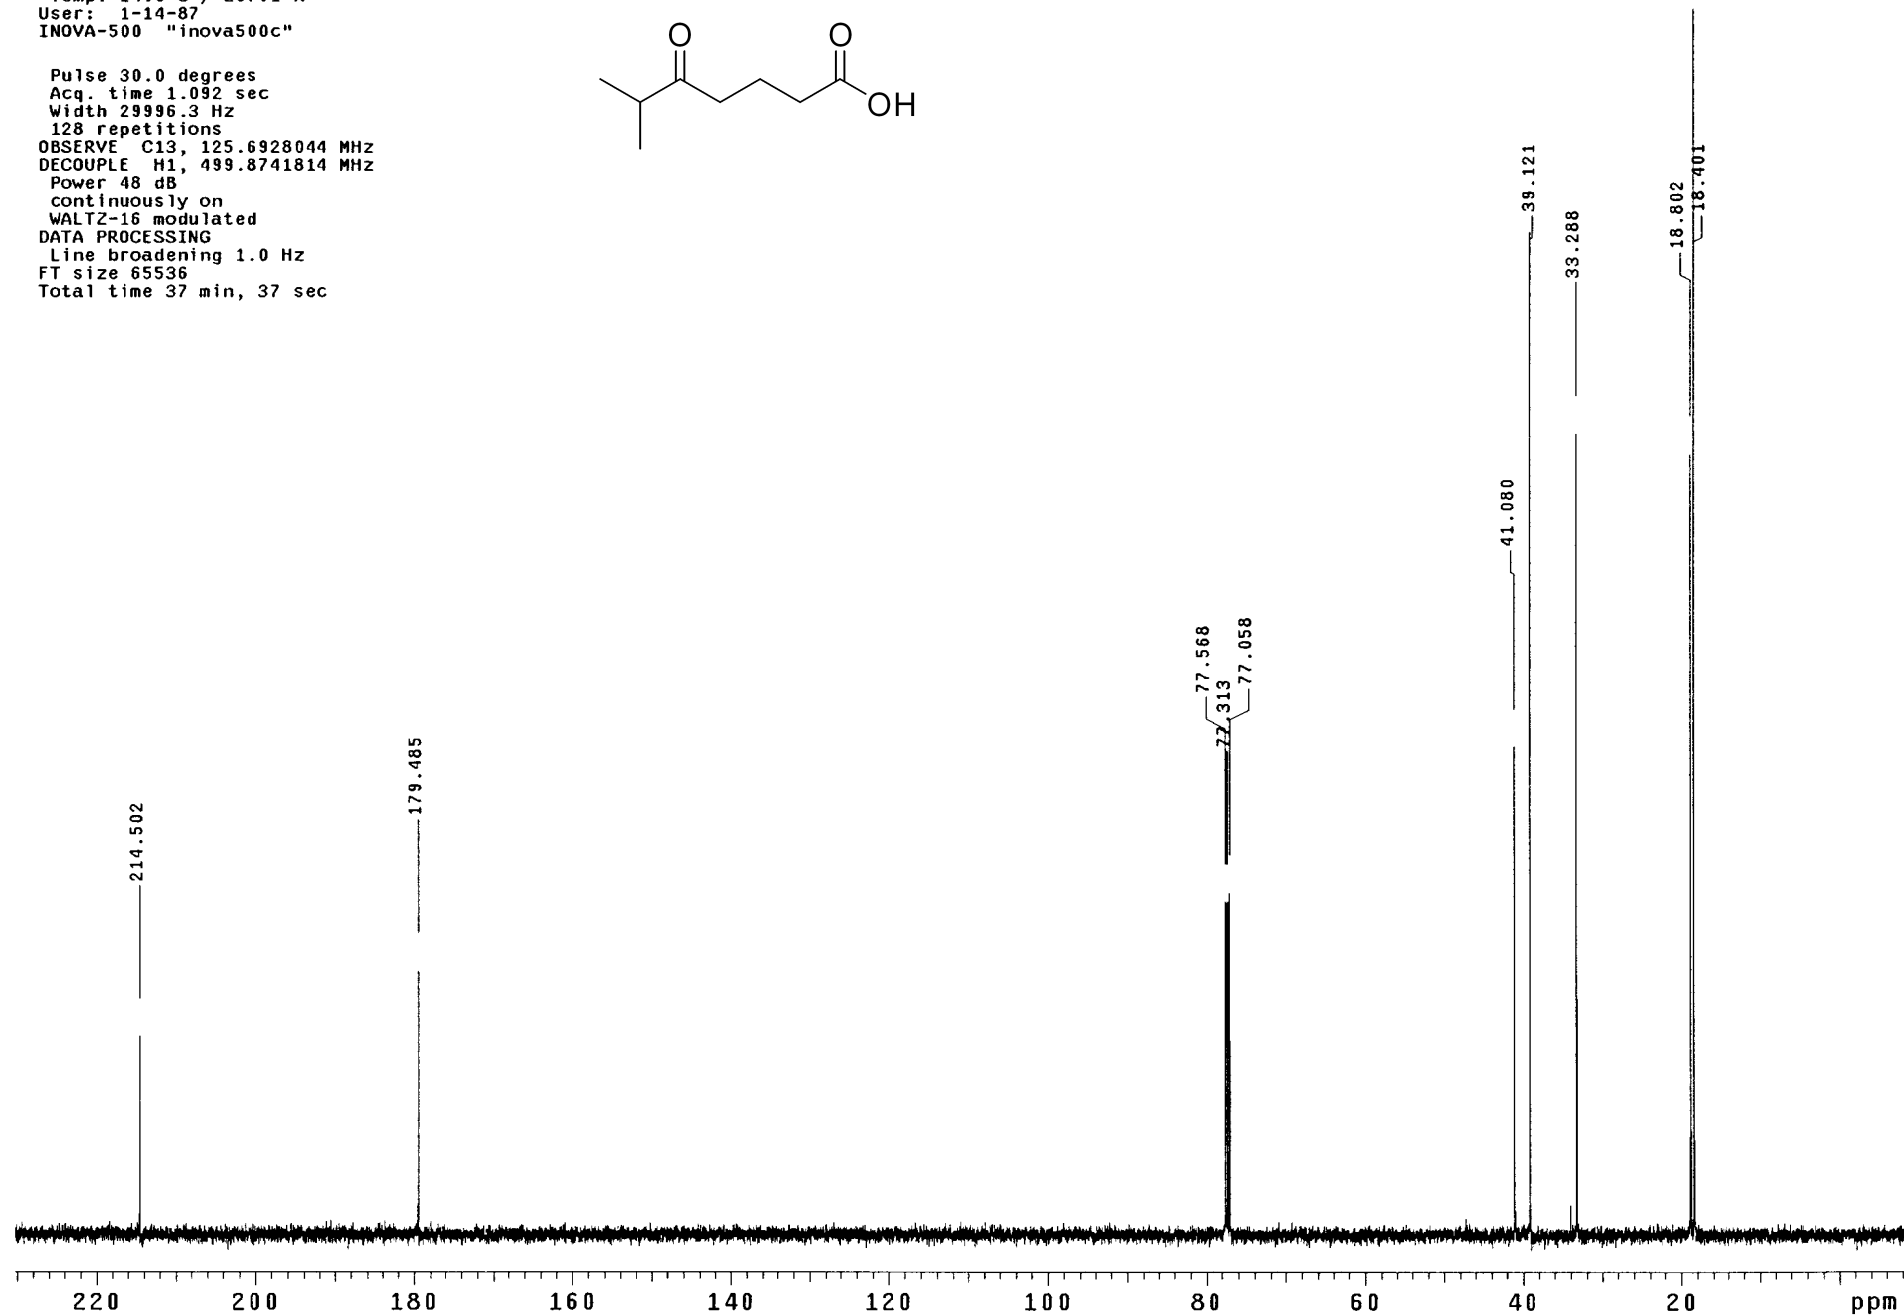



33gdimethyl

Pulse Sequence: s2pu1

Solvent: CDC13

Temp. 24.0 C / 297.1 K

INOVA-500 "inova500c"

Relax. delay 10.000 sec

Pulse 54.0 degrees

Acq. time 2.184 sec

Width 7501.2 Hz

4 repetitions

OBSERVE H1, 499.8716820 MHz

DATA PROCESSING

Line broadening 1.1 Hz

FT size 32768

Total time 1 min, 13 sec

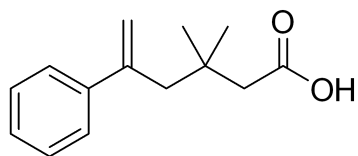

Filename: \_

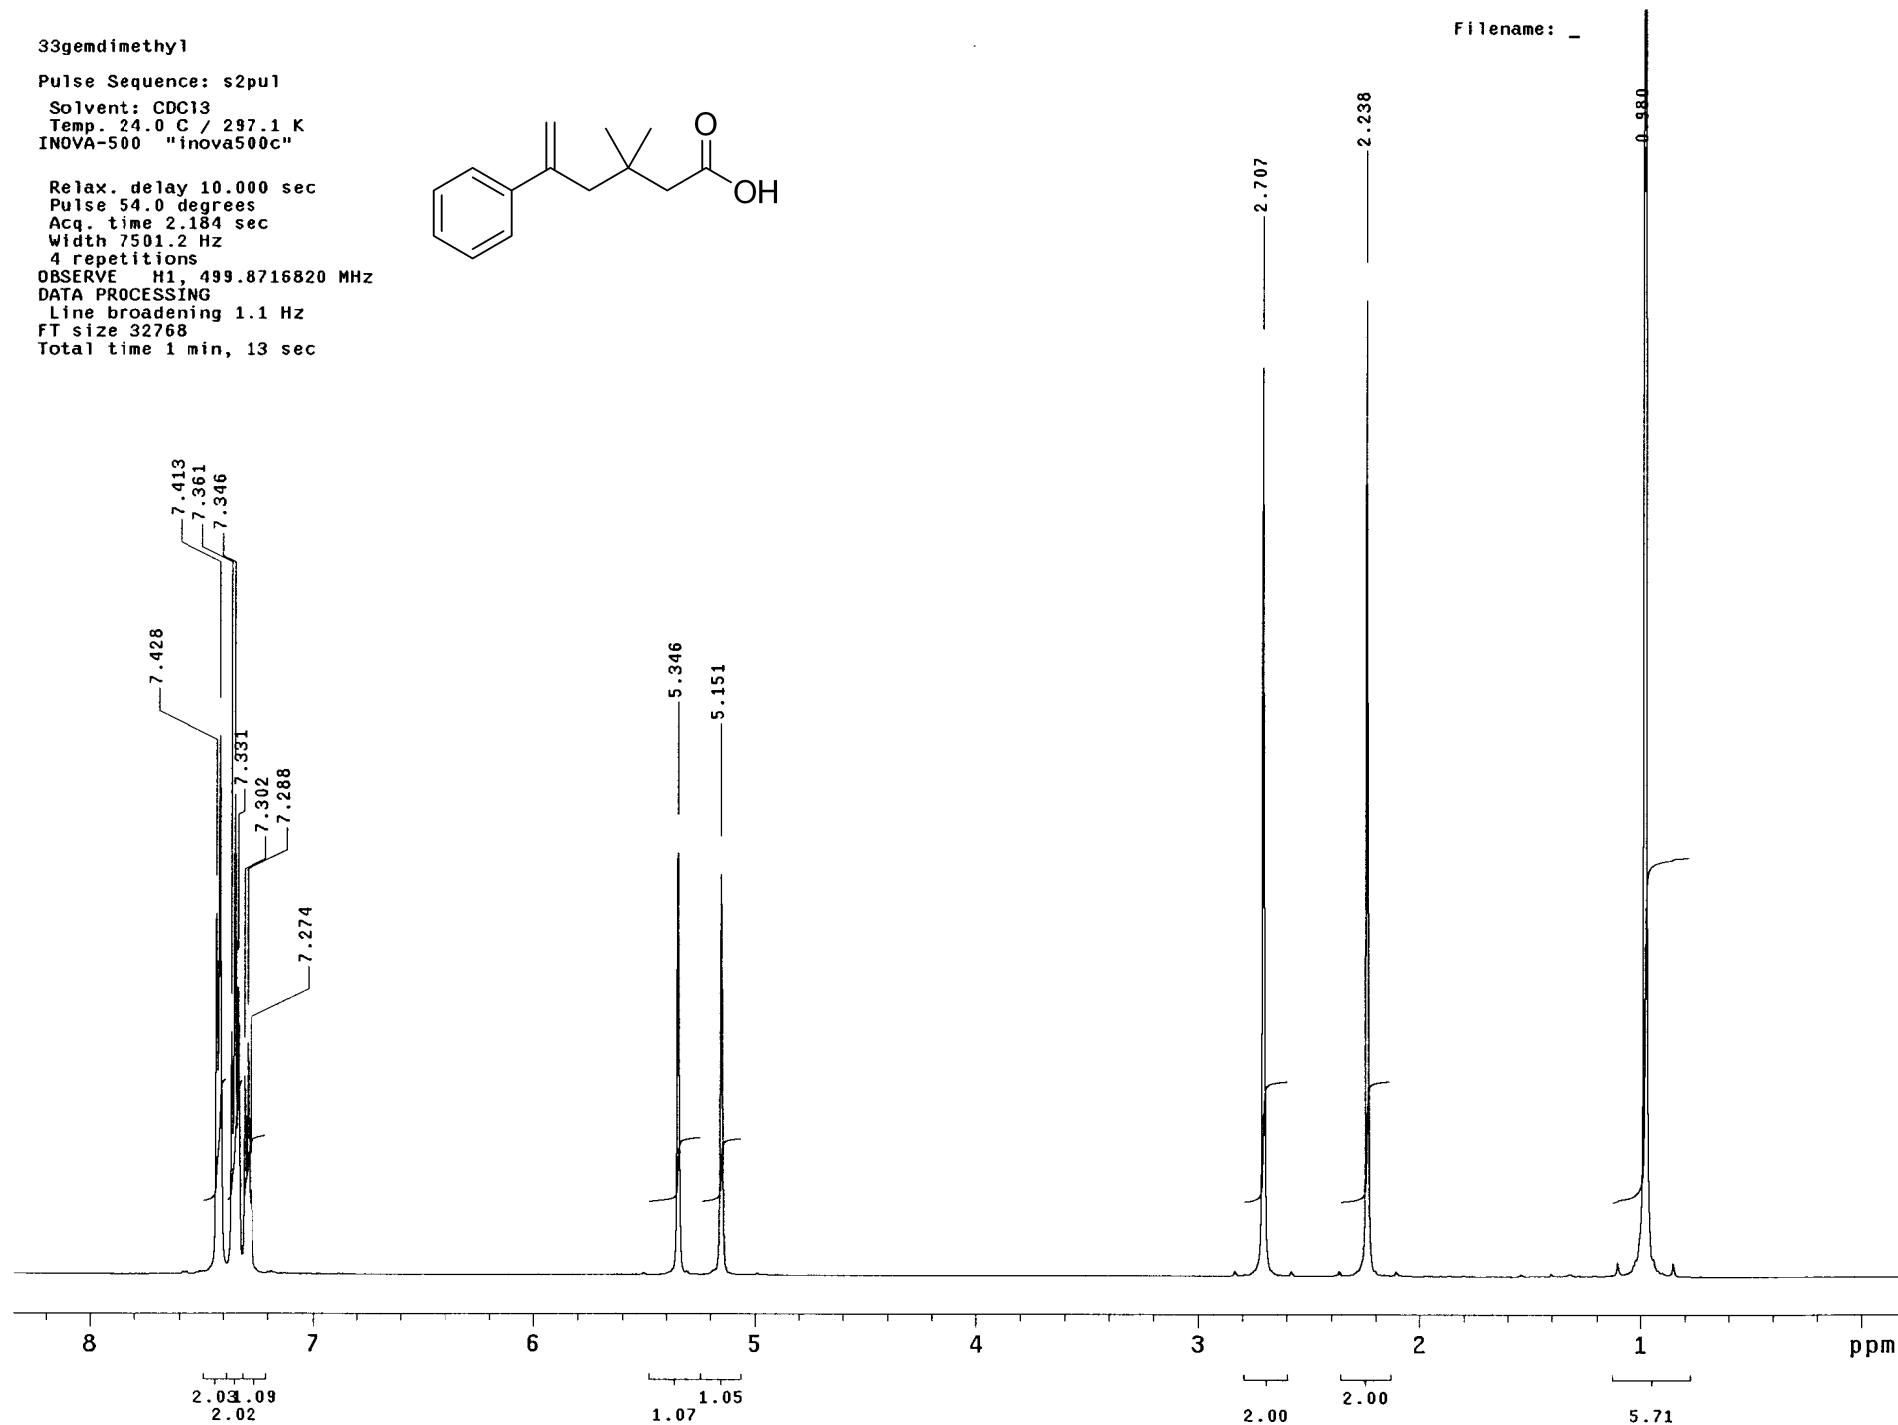

33gemidimethyl

Pulse Sequence: s2pu1

Solvent: CDC13

Temp. 24.0 C / 297.1 K

User: 1-14-87

INOVA-500 "inova500c"

Pulse 30.0 degrees

Acq. time 1.092 sec

Width 29996.3 Hz

64 repetitions

OBSERVE C13, 125.6928044 MHz

DECOUPLE H1, 499.8741814 MHz

Power 48 dB

continuously on

WALTZ-16 modulated

DATA PROCESSING

Line broadening 1.0 Hz

FT size 65536

Total time 37 min, 37 sec

Filename: \_

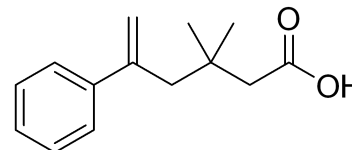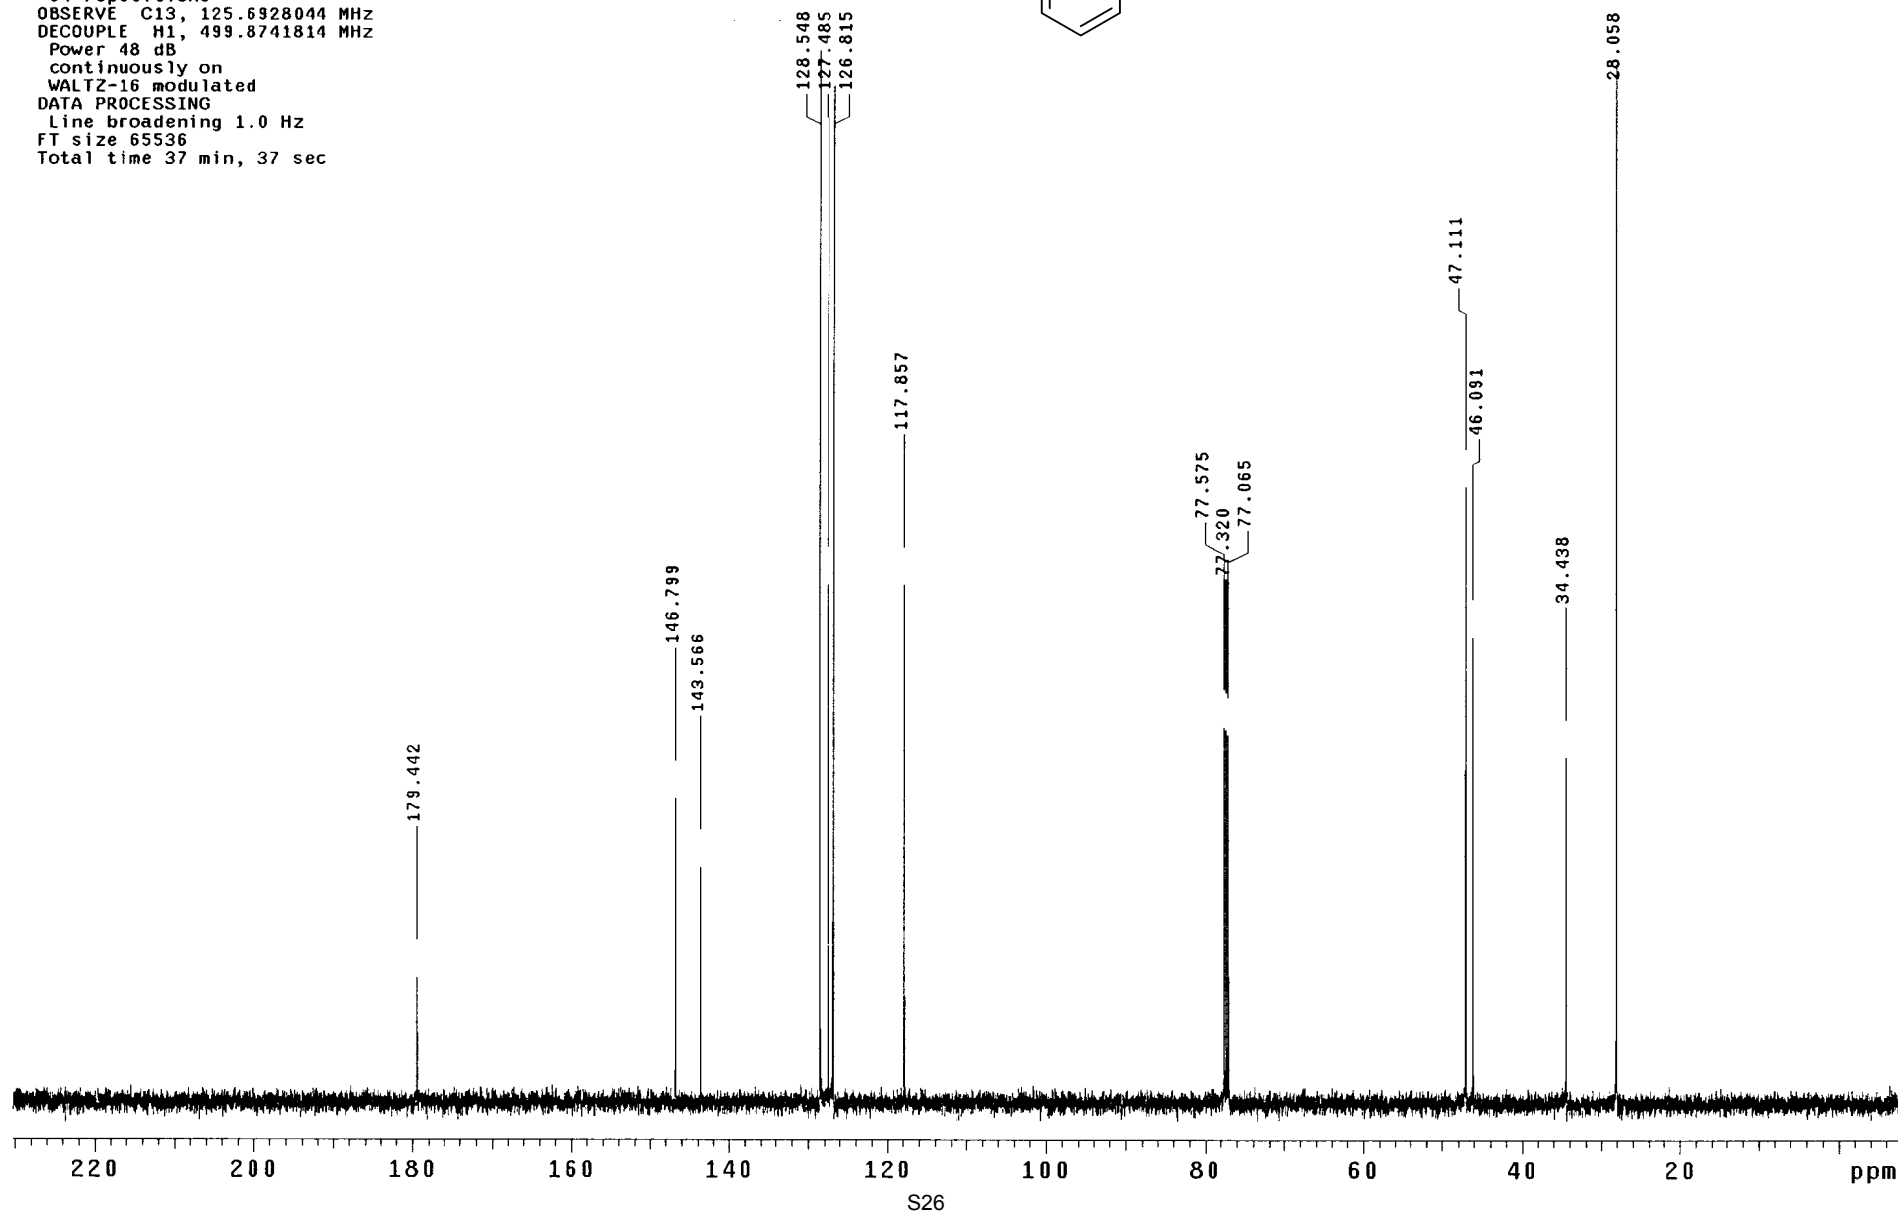

6bromo

Pulse Sequence: s2pu1  
Solvent: CDC13  
Temp. 24.0 C / 297.1 K  
INOVA-500 "inova500c"

Relax. delay 10.000 sec  
Pulse 54.0 degrees  
Acq. time 2.184 sec  
Width 7501.2 Hz  
4 repetitions  
OBSERVED - H1, 499.8716820 MHz  
DATE OF PROCESSING  
Line broadening 1.1 Hz  
FT Size 32768  
Total time 1 min, 13 sec

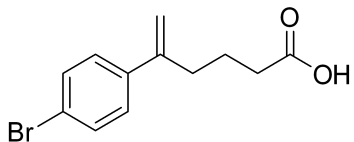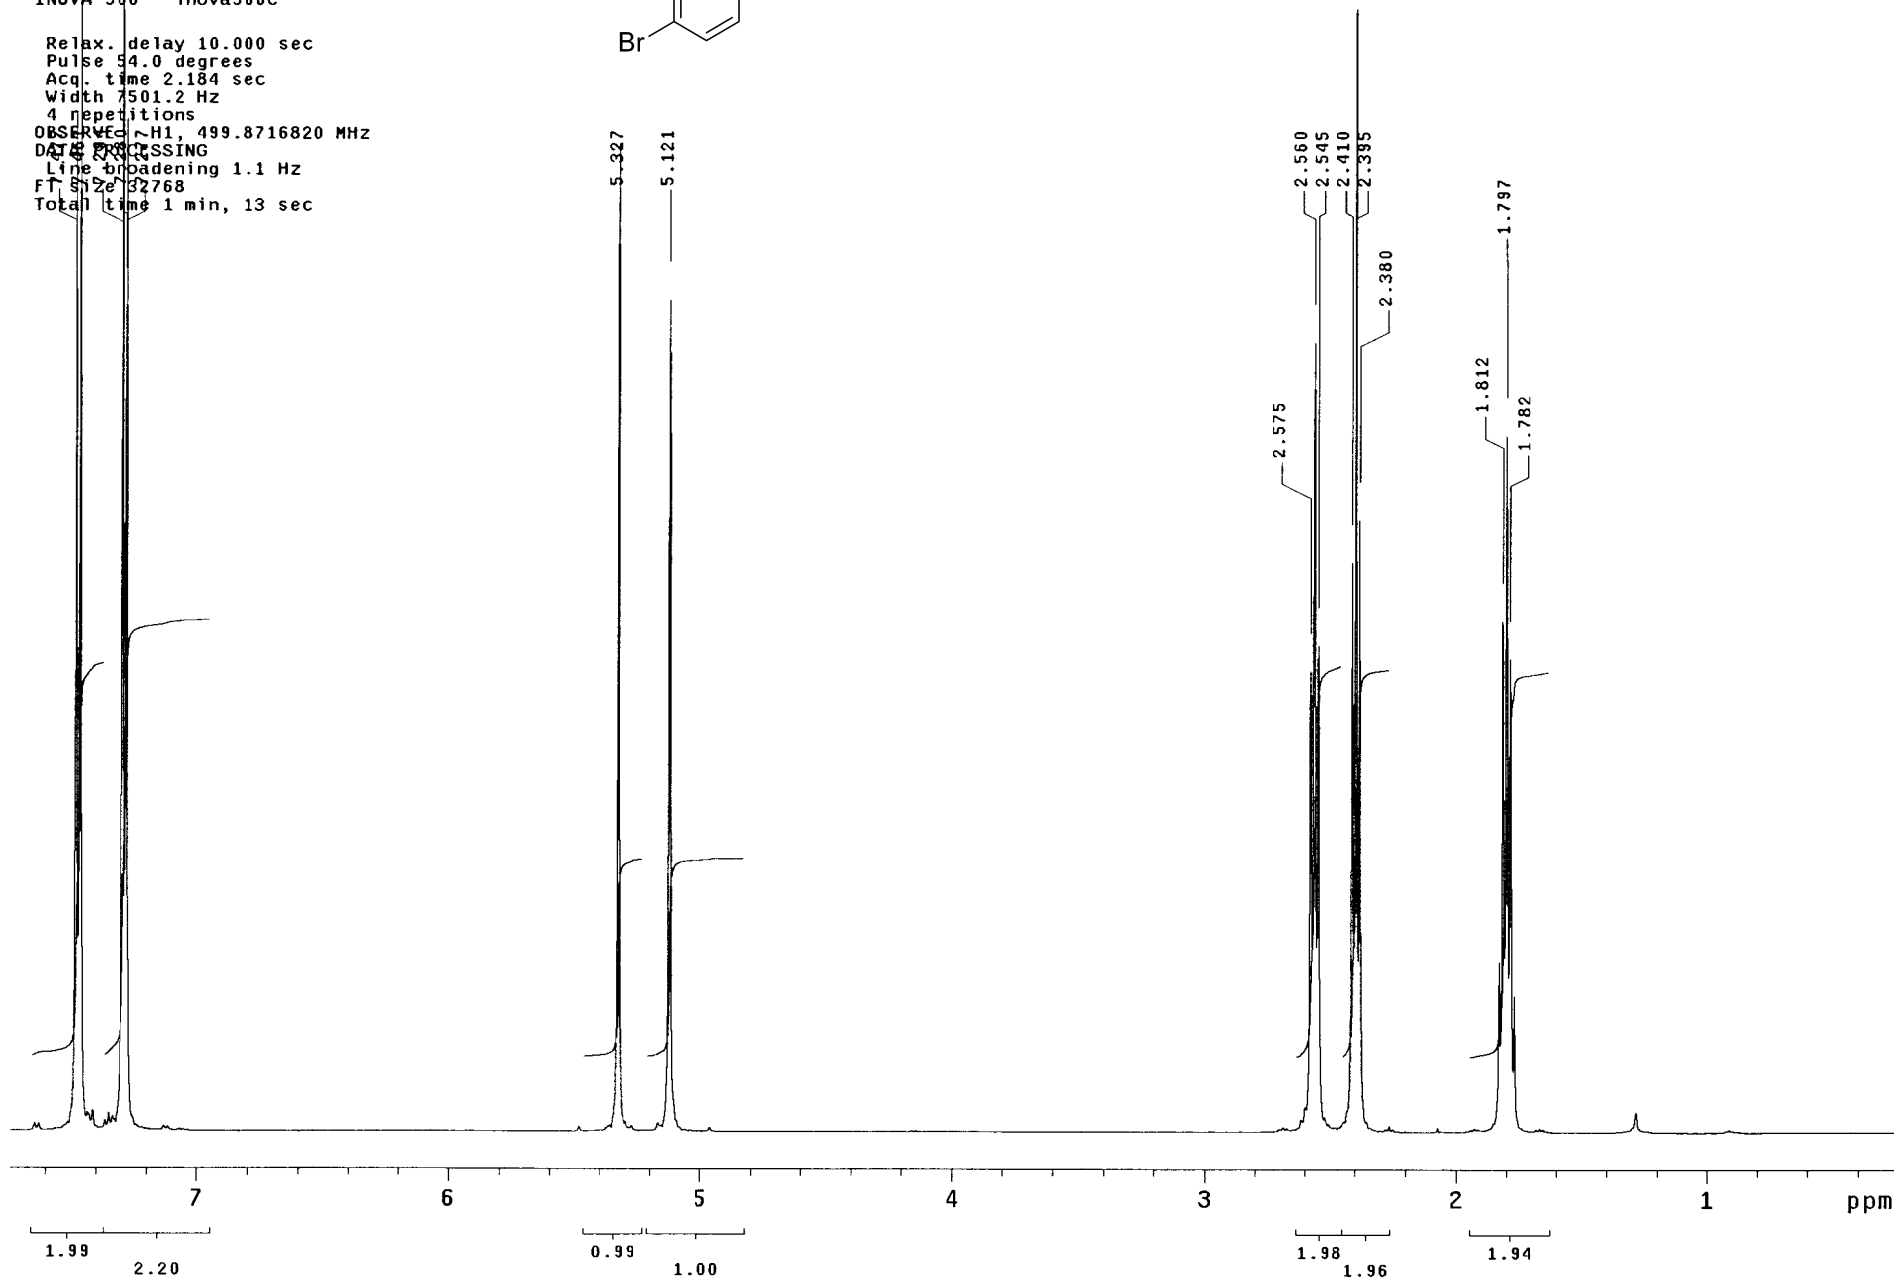

6bromo

Filename: \_

Pulse Sequence: s2pu1  
Solvent: CDC13  
Temp. 24.0 C / 297.1 K  
User: 1-14-87  
INOVA-500 "inova500c"

Pulse 30.0 degrees  
Acq. time 1.092 sec  
Width 29996.3 Hz  
224 repetitions  
OBSERVE C13, 125.6928044 MHz  
DECOUPLE H1, 499.8741814 MHz  
Power 48 dB  
continuously on  
WALTZ-16 modulated  
DATA PROCESSING  
Line broadening 1.0 Hz  
FT size 65536  
Total time 37 min, 37 sec

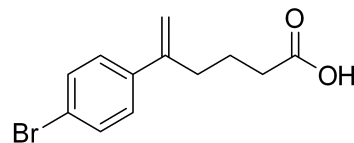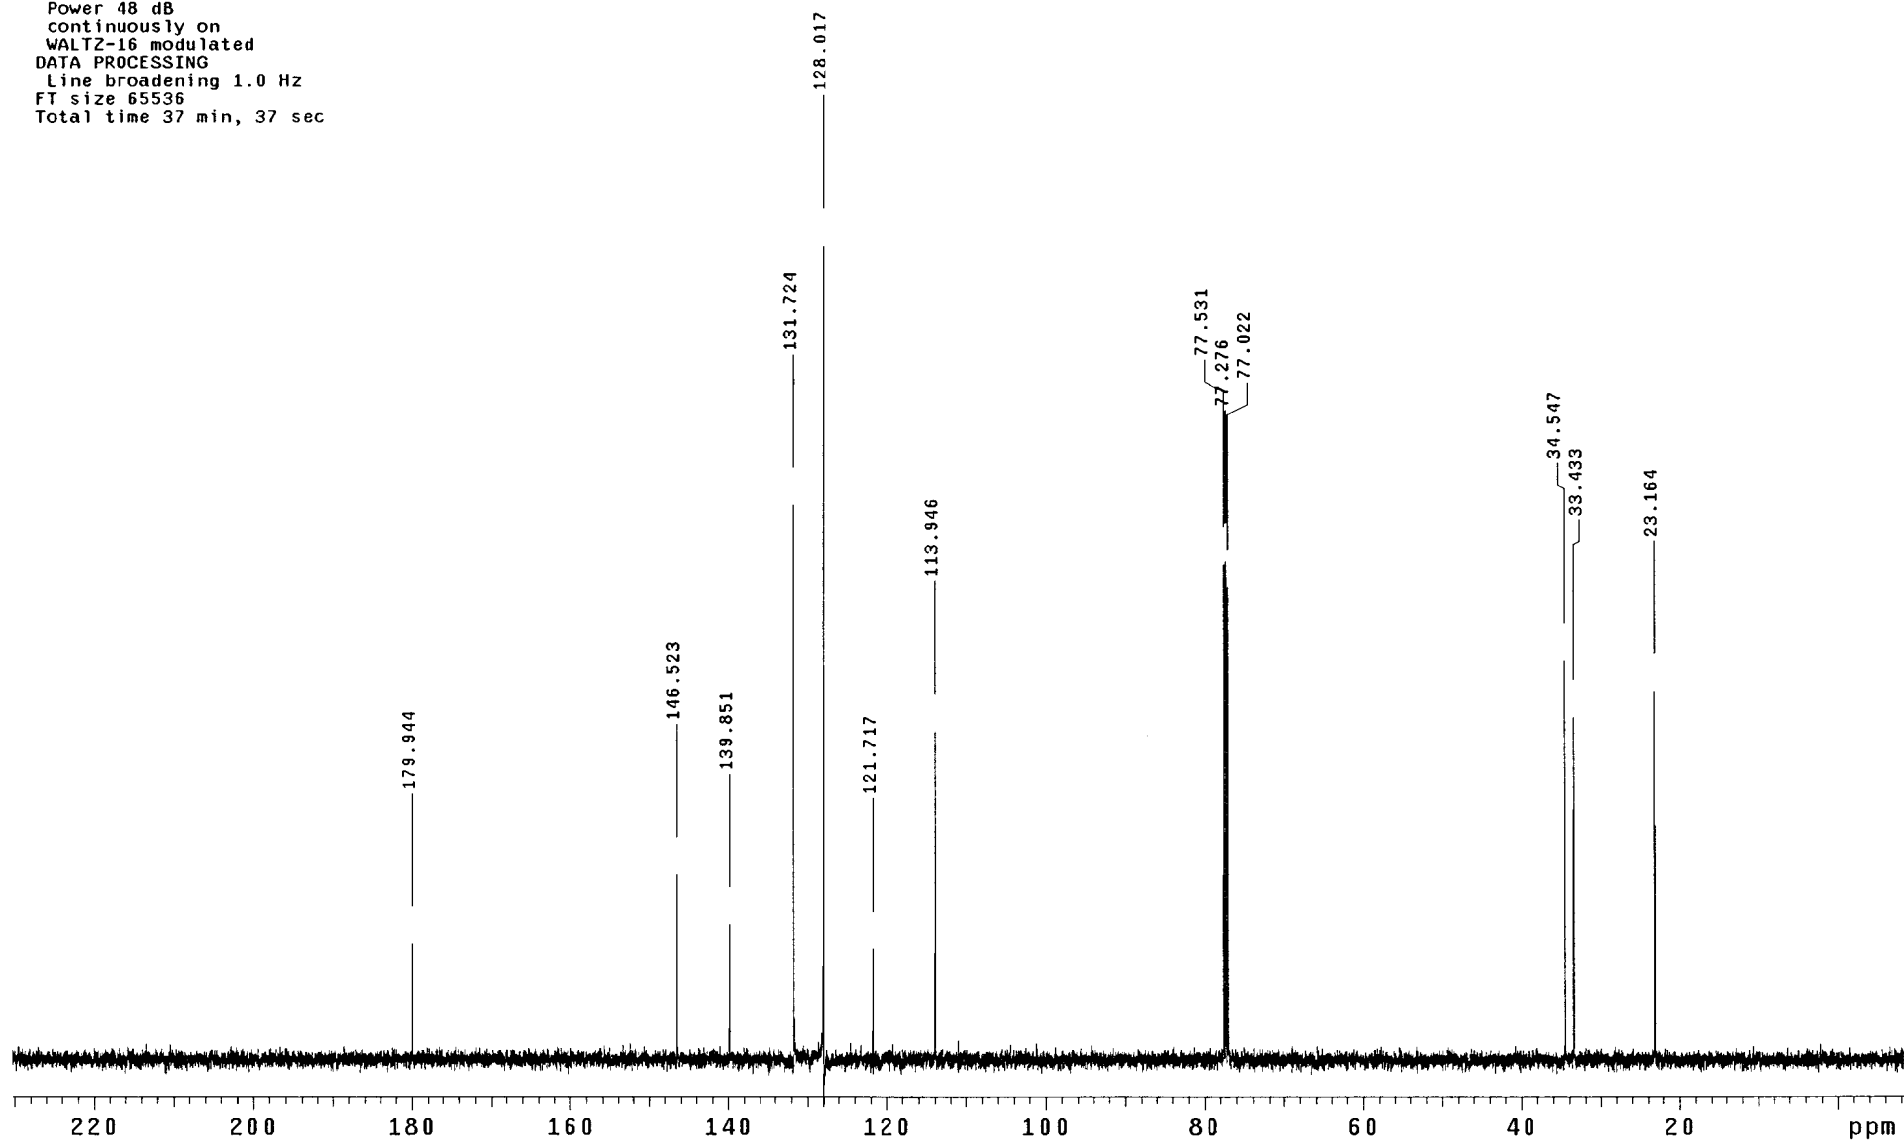

fluoro

Pulse Sequence: s2pu1  
Solvent: CDC13  
Temp. 24.0 C / 297.1 K  
INOVA-500 "inova500c"

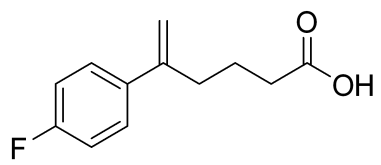

Relax. delay 10.000 sec  
Pulse 54.0 degrees  
Acq. time 2.184 sec  
Width 7501.2 Hz  
4 repetitions  
OBSERVE H1, 499.8716820 MHz  
DATA PROCESSING  
Line broadening 1.1 Hz  
FT size 32768  
Total time 1 min, 13 sec

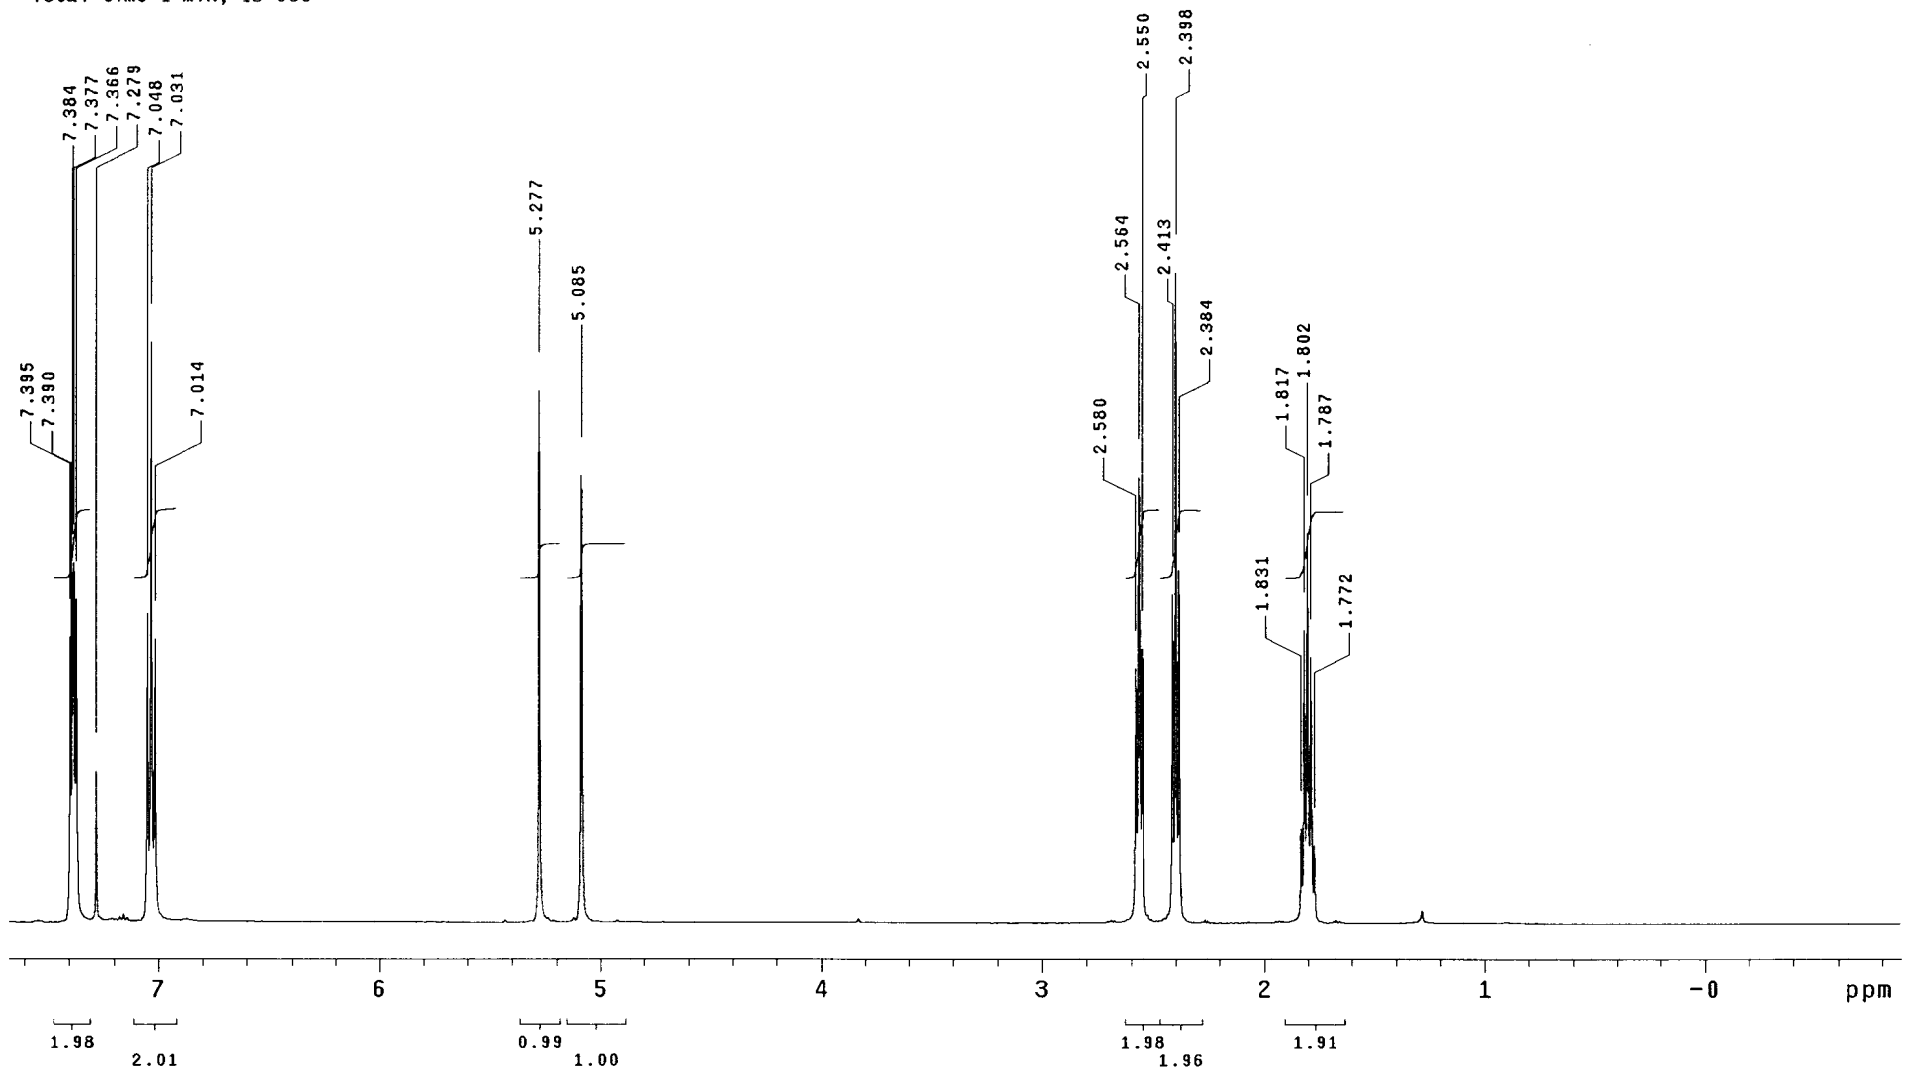

fluoro

Pulse Sequence: s2pu1

Solvent: CDC13  
Temp. 24.0 C / 297.1 K  
User: 1-14-87  
INOVA-500 "inova500c"

Pulse 30.0 degrees  
Acq. time 1.092 sec  
Width 29996.3 Hz  
192 repetitions  
OBSERVE C13, 125.6928044 MHz  
DECOUPLE H1, 499.8741814 MHz  
Power 48 dB  
continuously on  
WALTZ-16 modulated  
DATA PROCESSING  
Line broadening 1.0 Hz  
FT size 65536  
Total time 37 min, 37 sec

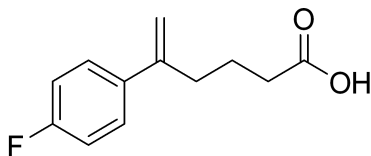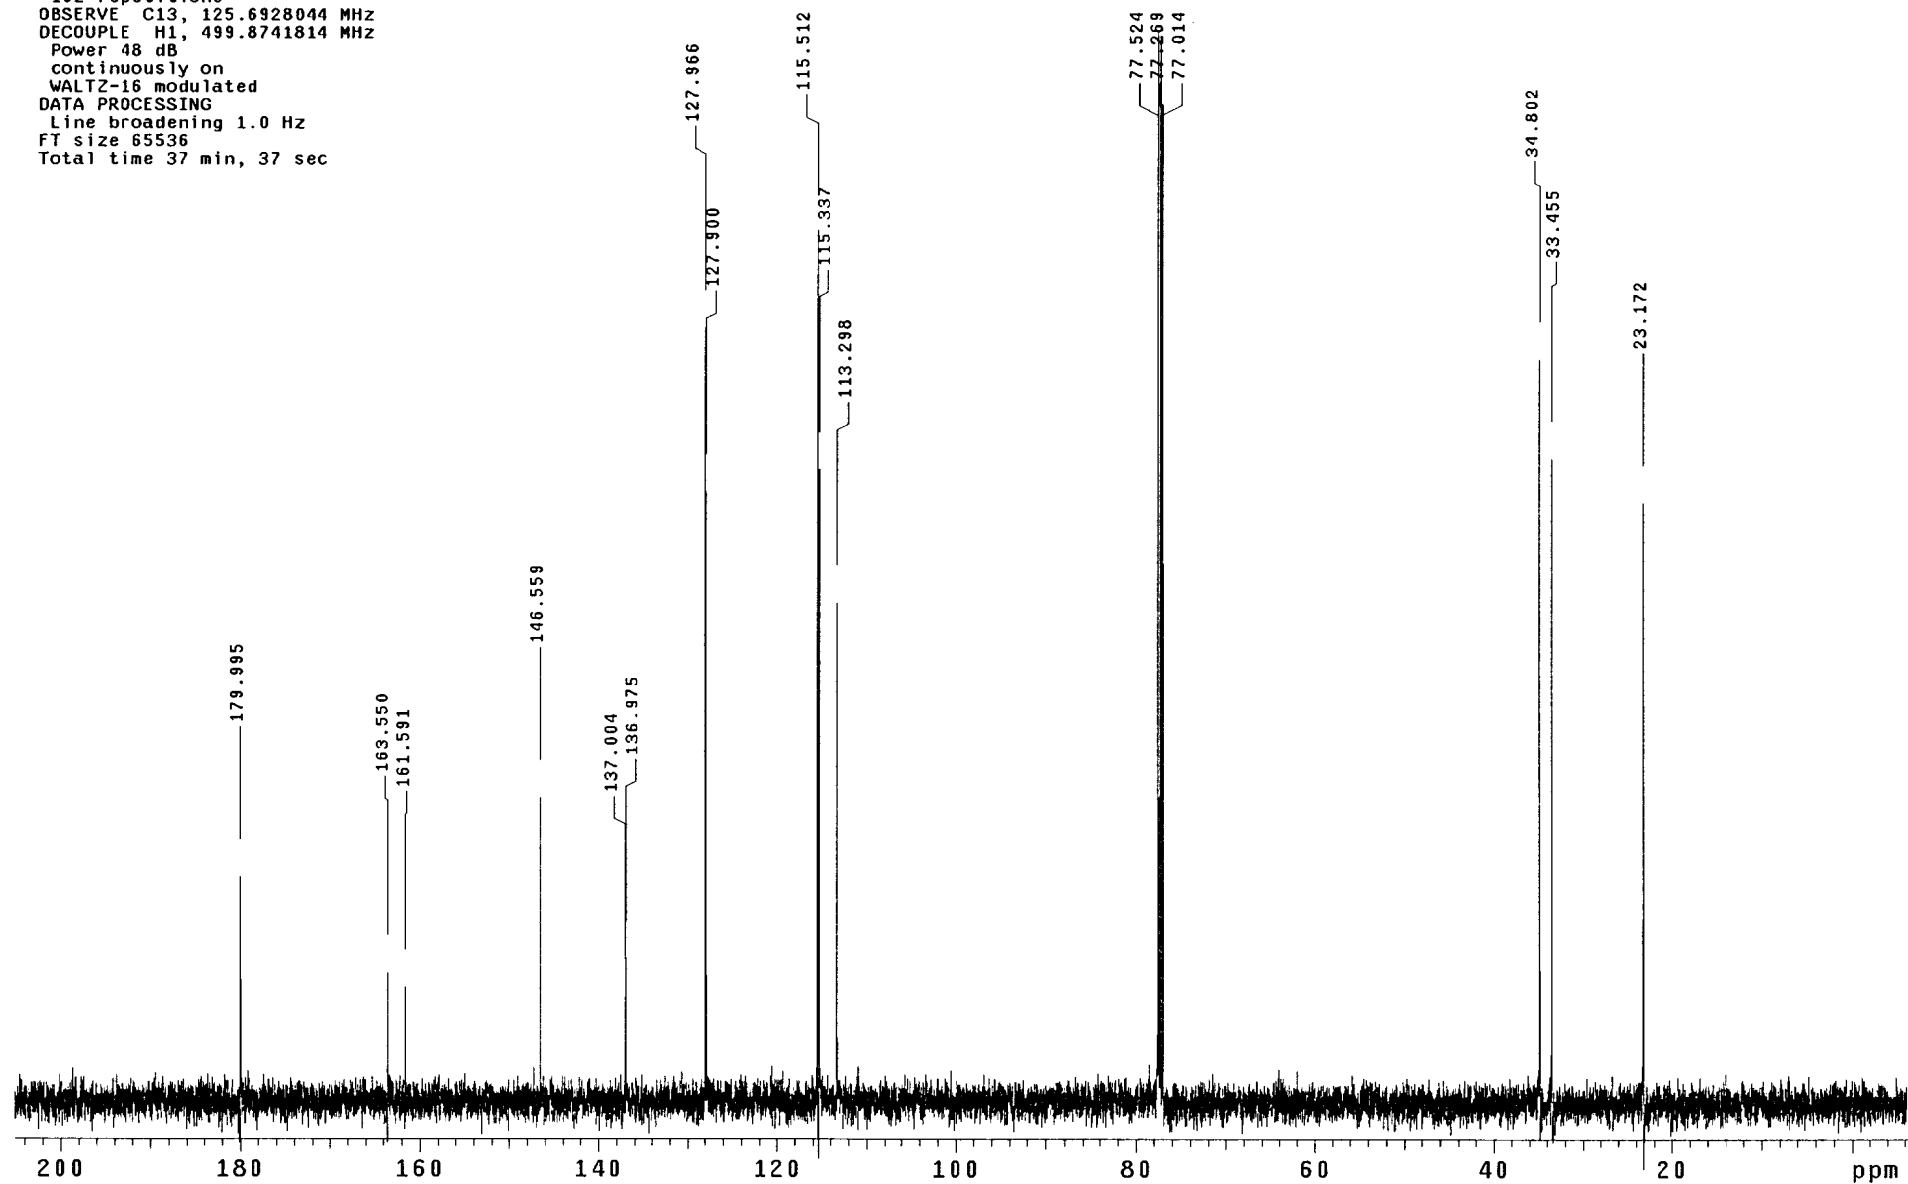

chloro

Pulse Sequence: s2pu1

Solvent: CDC13  
 Temp. 24.0 C / 297.1 K  
 INOVA-500 "inova500c"

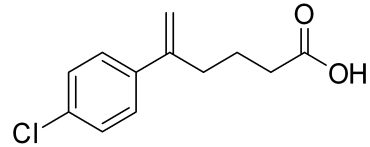

Relax. delay 10.000 sec  
 Pulse 54.0 degrees  
 Acq. time 2.184 sec  
 Width 7501.2 Hz  
 4 repetitions  
 OBSERVE H1, 499.8716820 MHz  
 DATA PROCESSING  
 Line broadening 1.1 Hz  
 FT size 32768  
 Total time 1 min, 13 sec

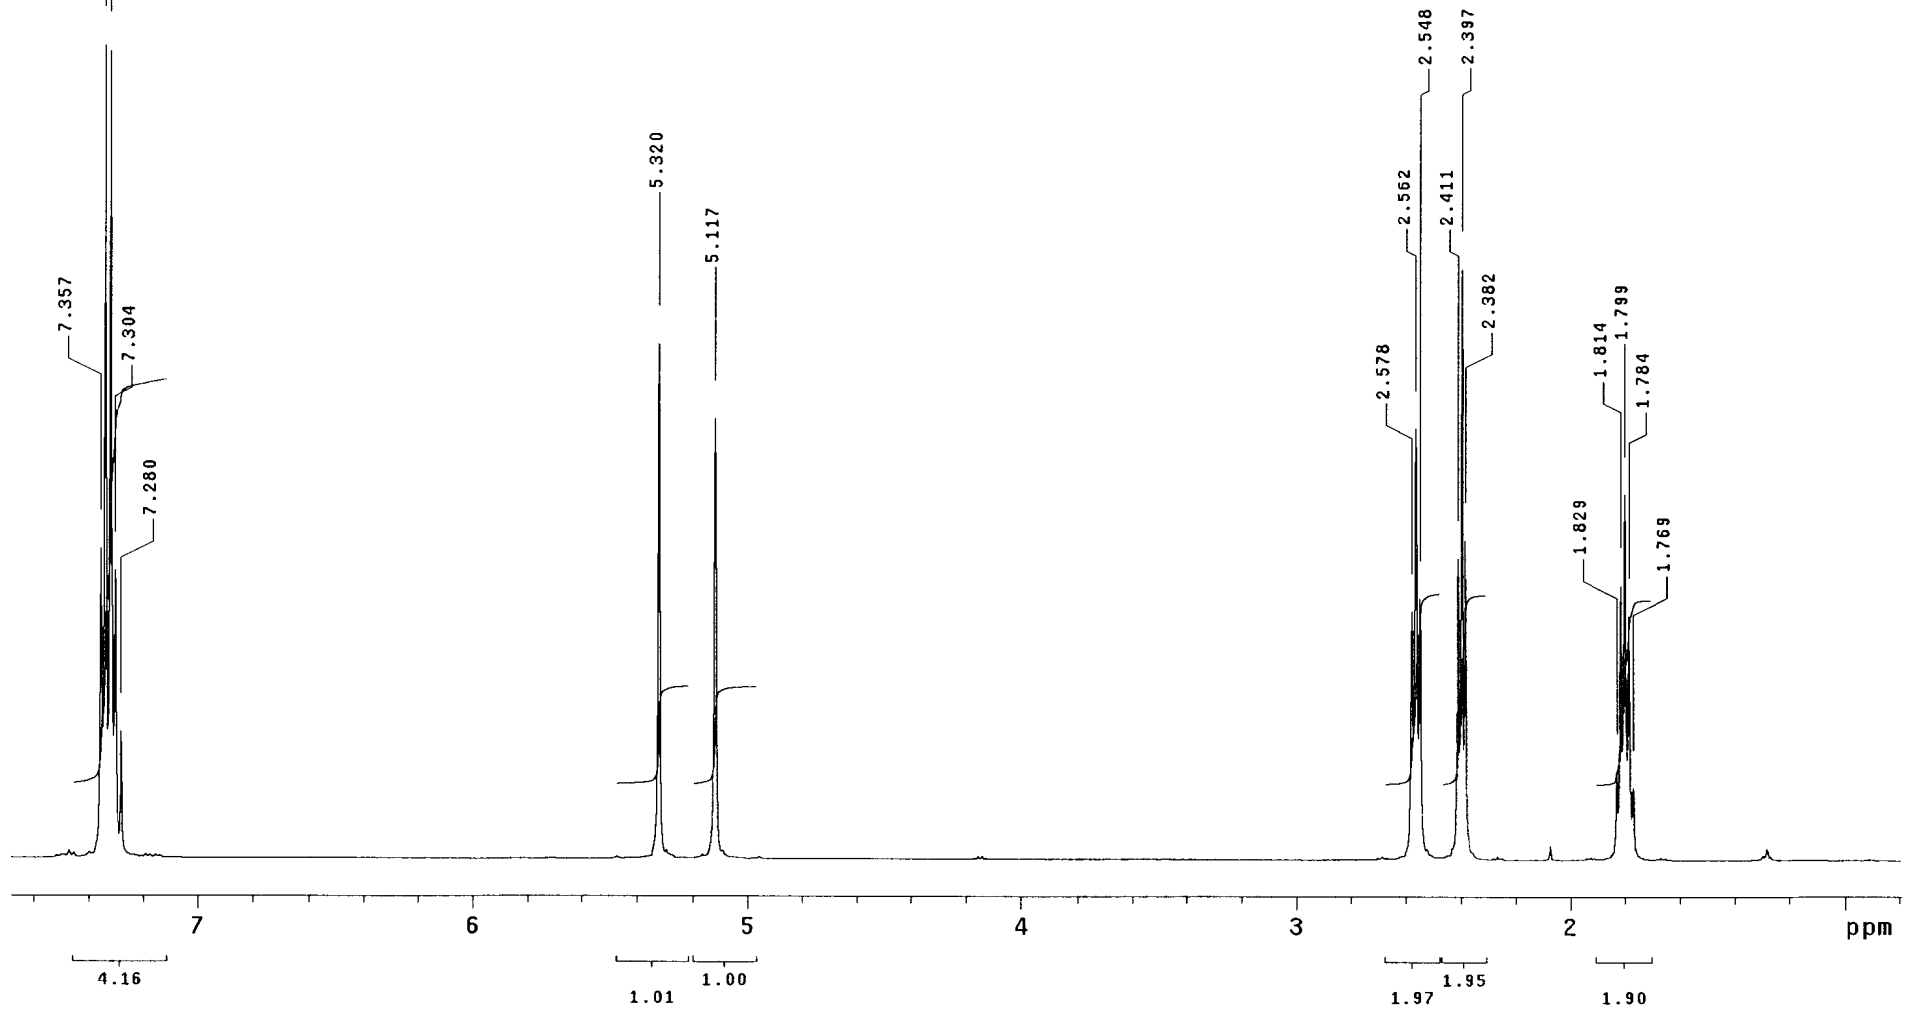

chloro

Pulse Sequence: s2pu1  
Solvent: CDC13  
Temp. 24.0 C / 297.1 K  
User: 1-14-87  
INOVA-500 "inova500c"

Pulse 30.0 degrees  
Acq. time 1.092 sec  
Width 29996.3 Hz  
320 repetitions  
OBSERVE C13, 125.6928044 MHz  
DECOUPLE H1, 499.8741814 MHz  
Power 48 dB  
continuously on  
WALTZ-16 modulated  
DATA PROCESSING  
Line broadening 1.0 Hz  
FT size 65536  
Total time 37 min, 37 sec

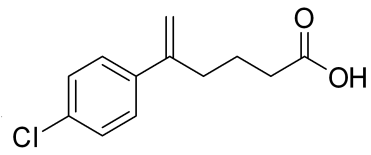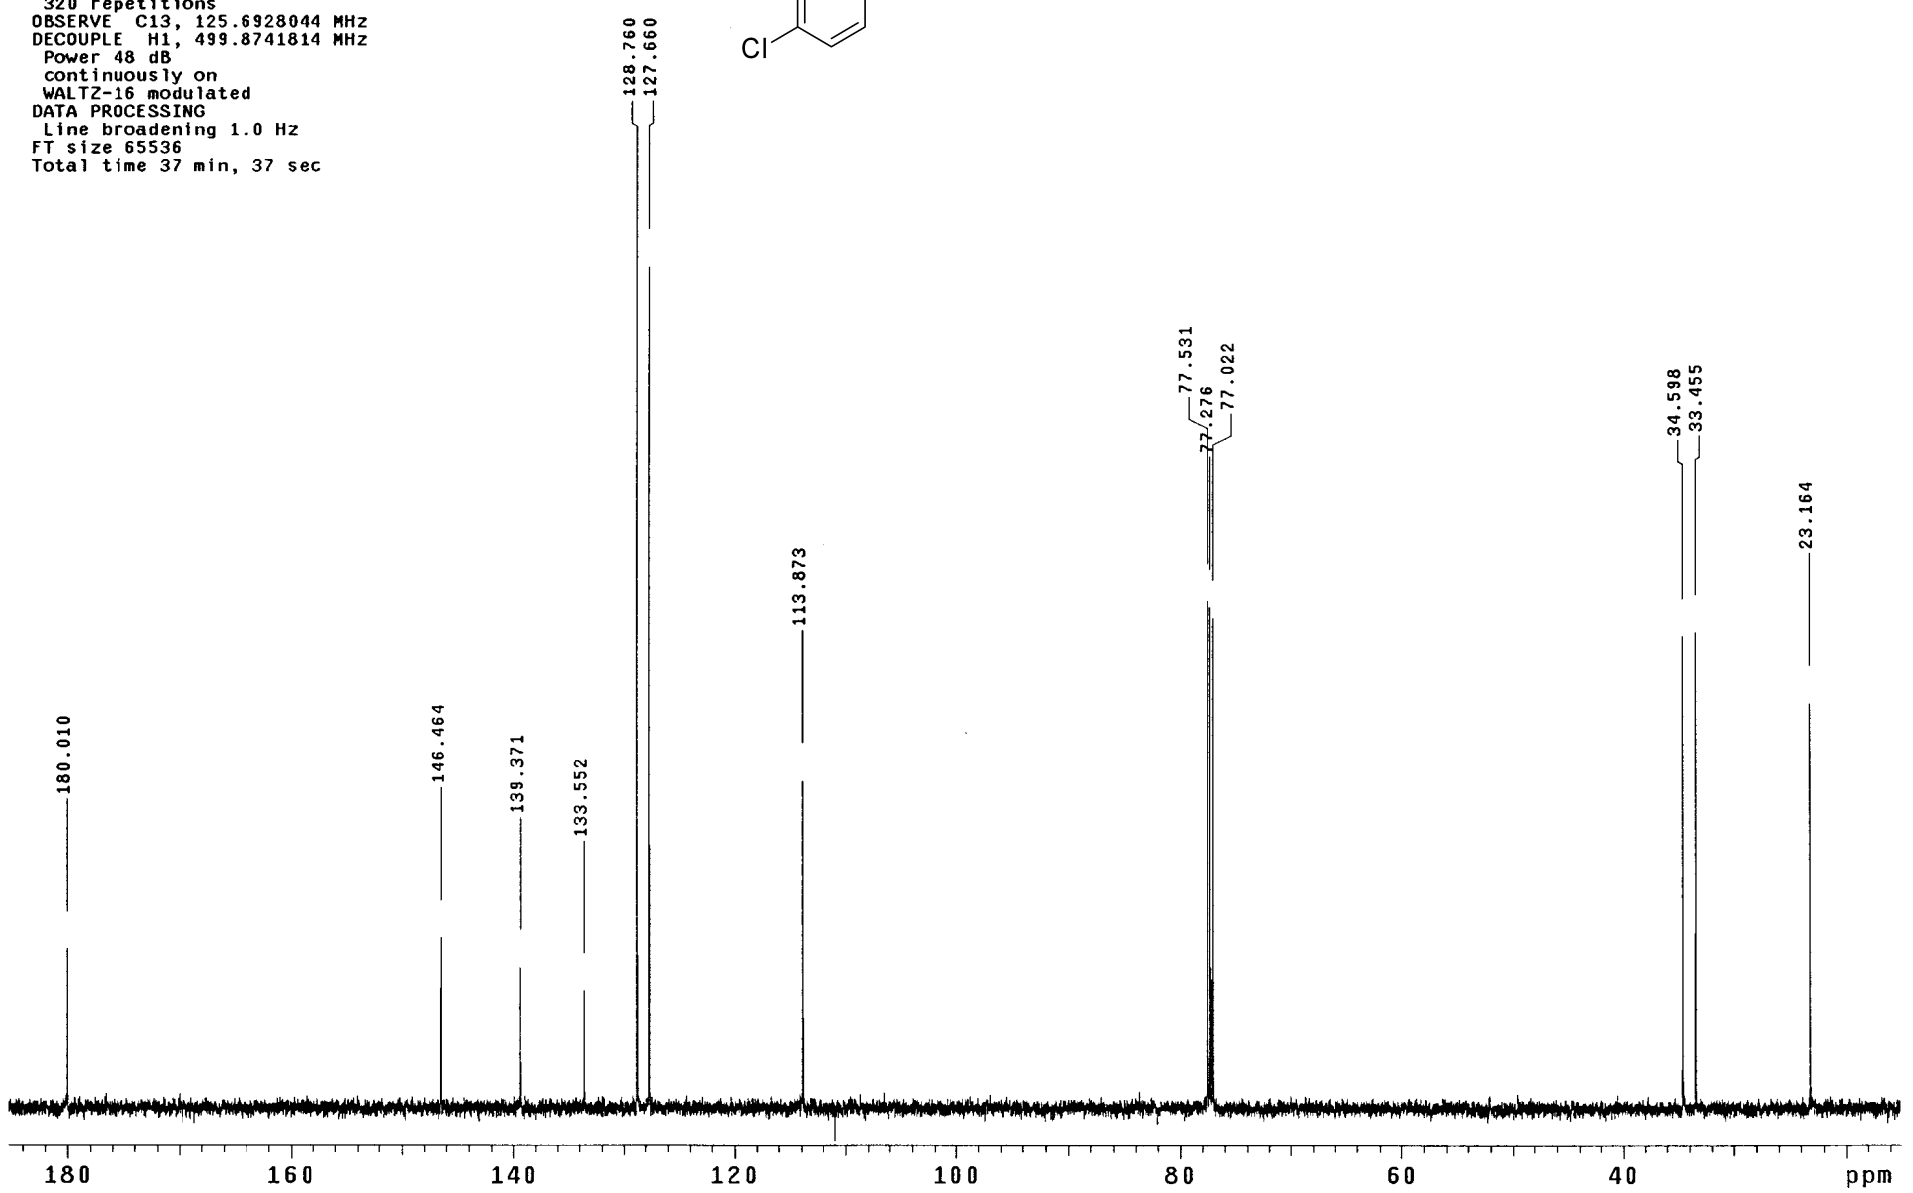



Pulse Sequence: s2pu1  
Solvent: CDC13  
Temp. 25.0 C / 298.1 K  
INOVA-500 "inova500c"

Pulse 54.0 degrees  
Acq. time 2.184 sec  
Width 7501.2 Hz  
32 repetitions  
OBSERVE H1, 499.8716820 MHz  
DATA PROCESSING  
Line broadening 1.1 Hz  
FT size 32768  
Total time 1 min, 14 sec

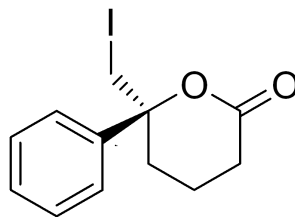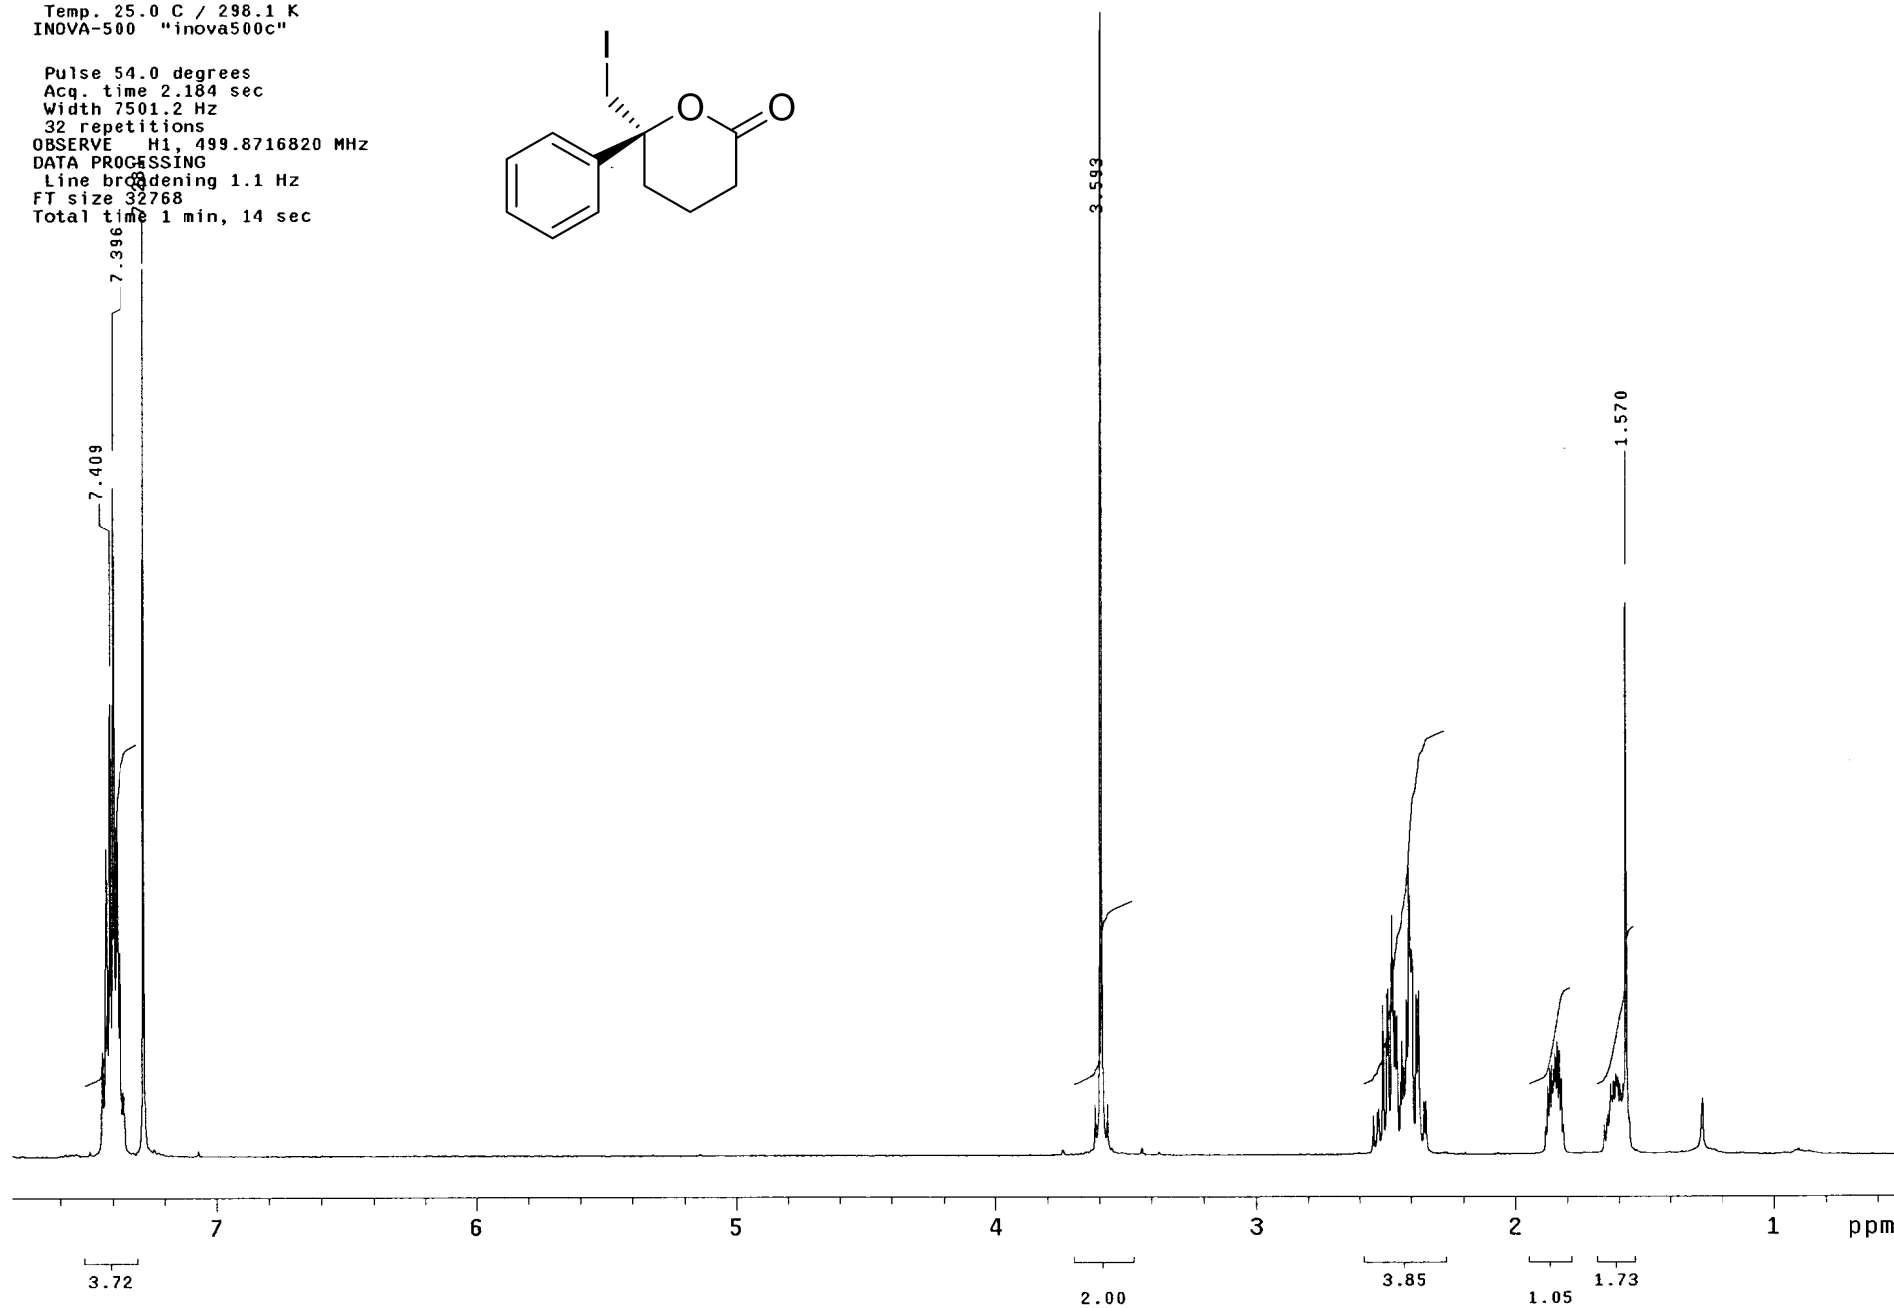

STANDARD CARBON PARAMETERS

Pulse Sequence: s2pu1

Solvent: CDC13  
Temp. 25.0 C / 298.1 K  
User: 1-14-87  
INOVA-500 "inova500c"

Pulse 30.0 degrees  
Acq. time 1.092 sec  
Width 29996.3 Hz  
1952 repetitions  
OBSERVE C13, 125.6928044 MHz  
DECOUPLE H1, 499.8741814 MHz  
Power 48 dB  
continuously on  
WALTZ-16 modulated  
DATA PROCESSING  
Line broadening 1.0 Hz  
FT size 65536  
Total time 1 hr, 15 min, 13 sec

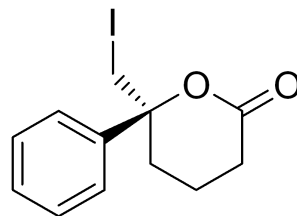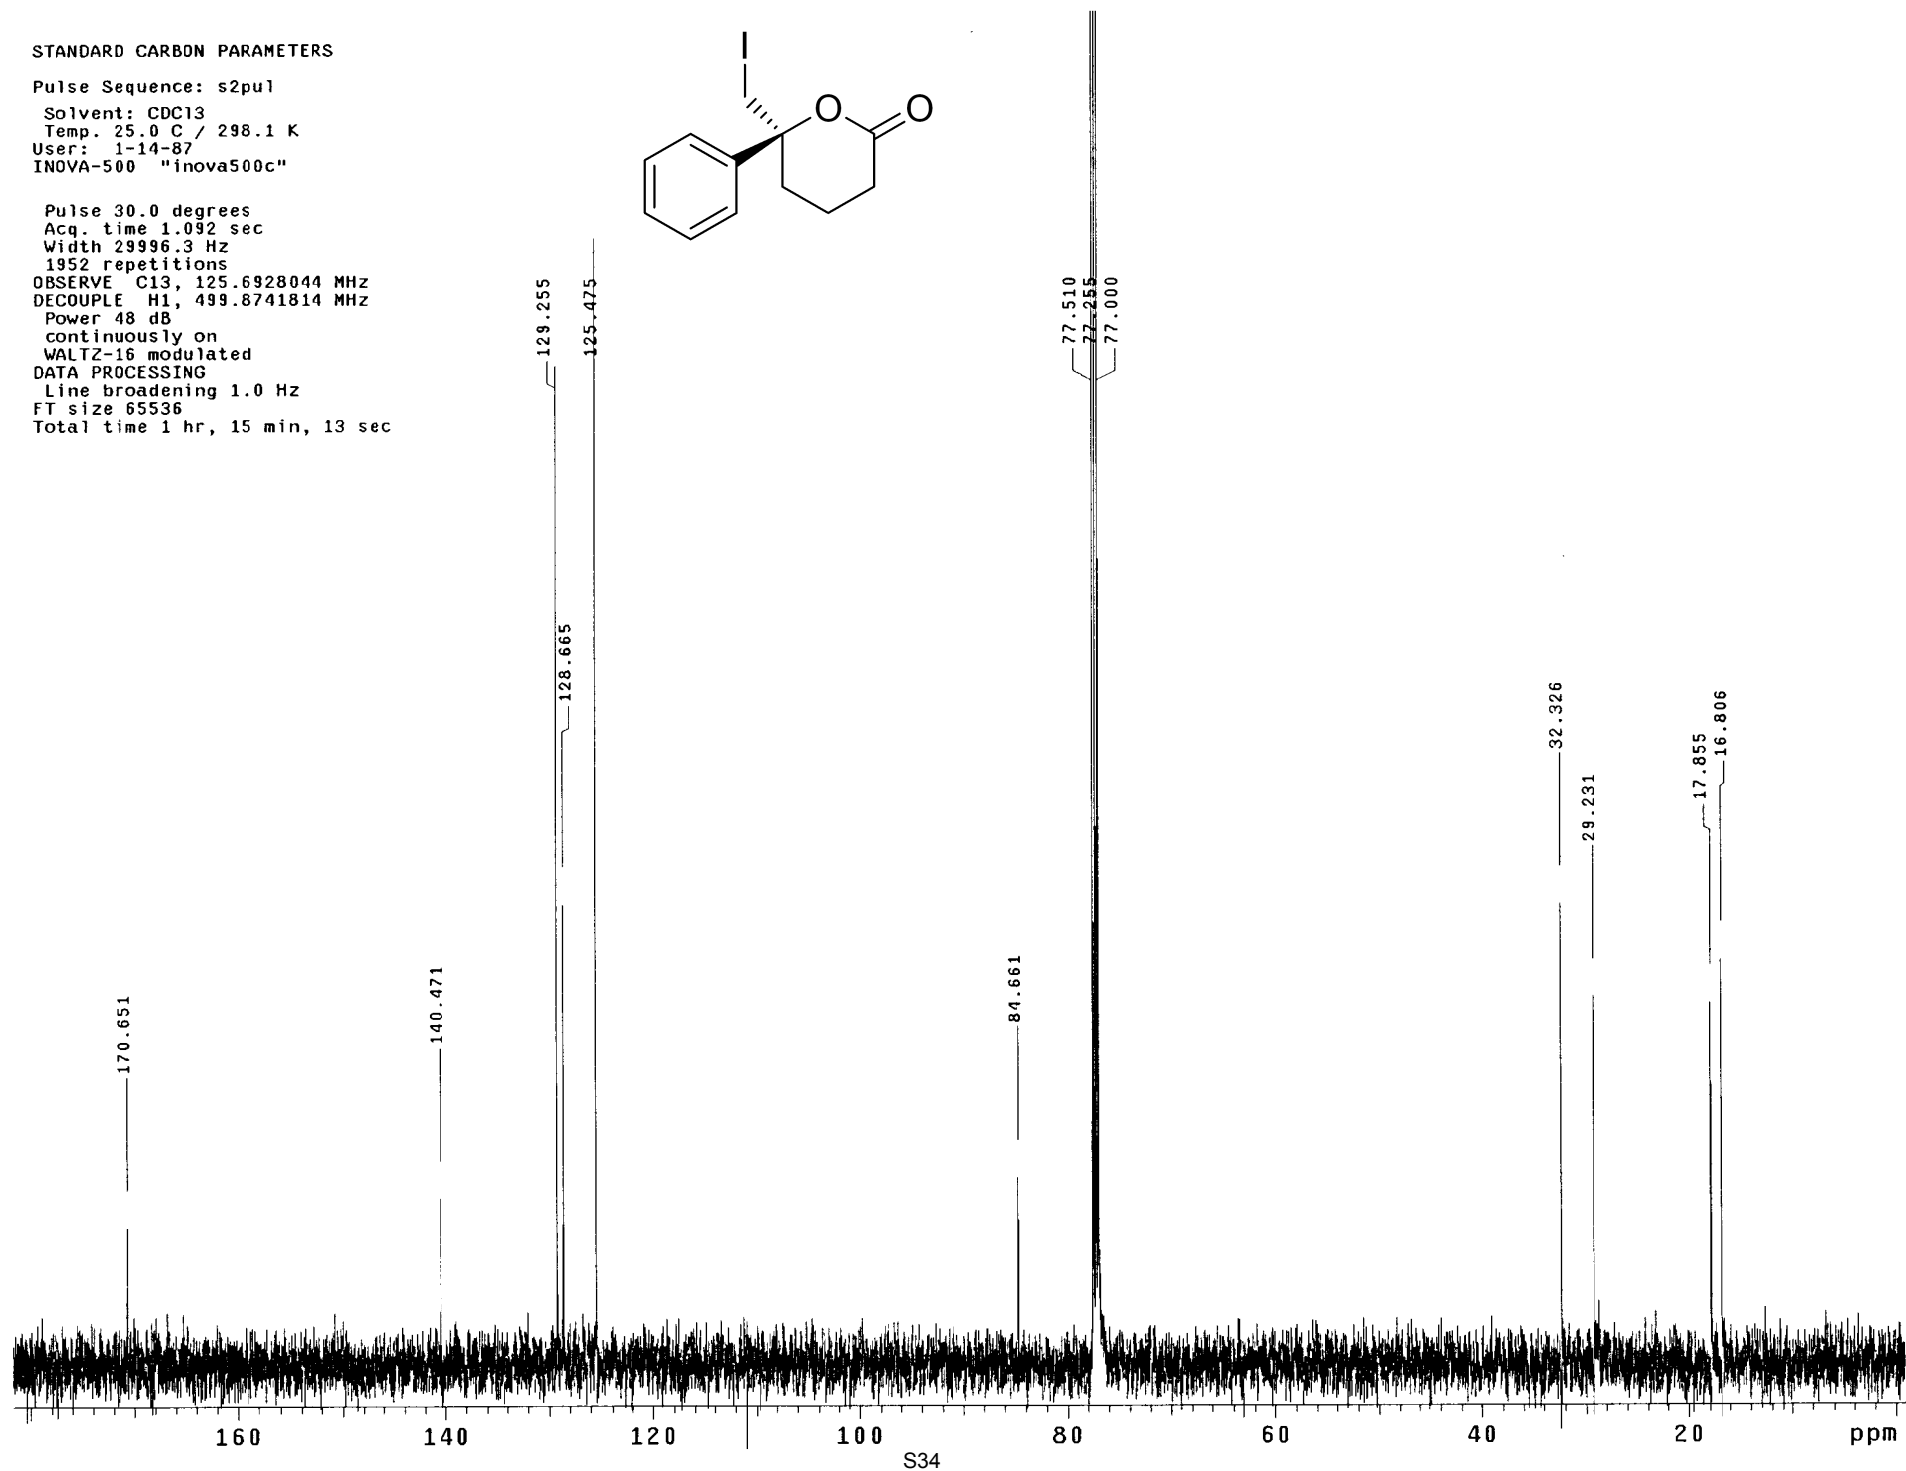

methyl

Data Collected on:  
nmrsun2-inova500  
Archive directory:  
/export/home/ds2/vnmrsys/data  
Sample directory:

File: Gev398-2protonmethylproduct

Pulse Sequence: s2pu1  
Solvent: CDC13  
Temp. 24.0 C / 297.1 K

Pulse 54.0 degrees  
Acq. time 2.184 sec  
Width 7501.2 Hz  
32 repetitions  
OBSERVE H1, 499.8716820 MHz  
DATA PROCESSING  
Line broadening 1.1 Hz  
FT size 32768  
Total time 1 min

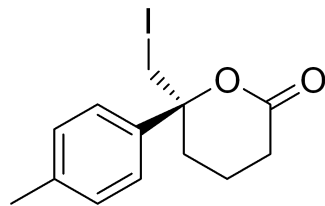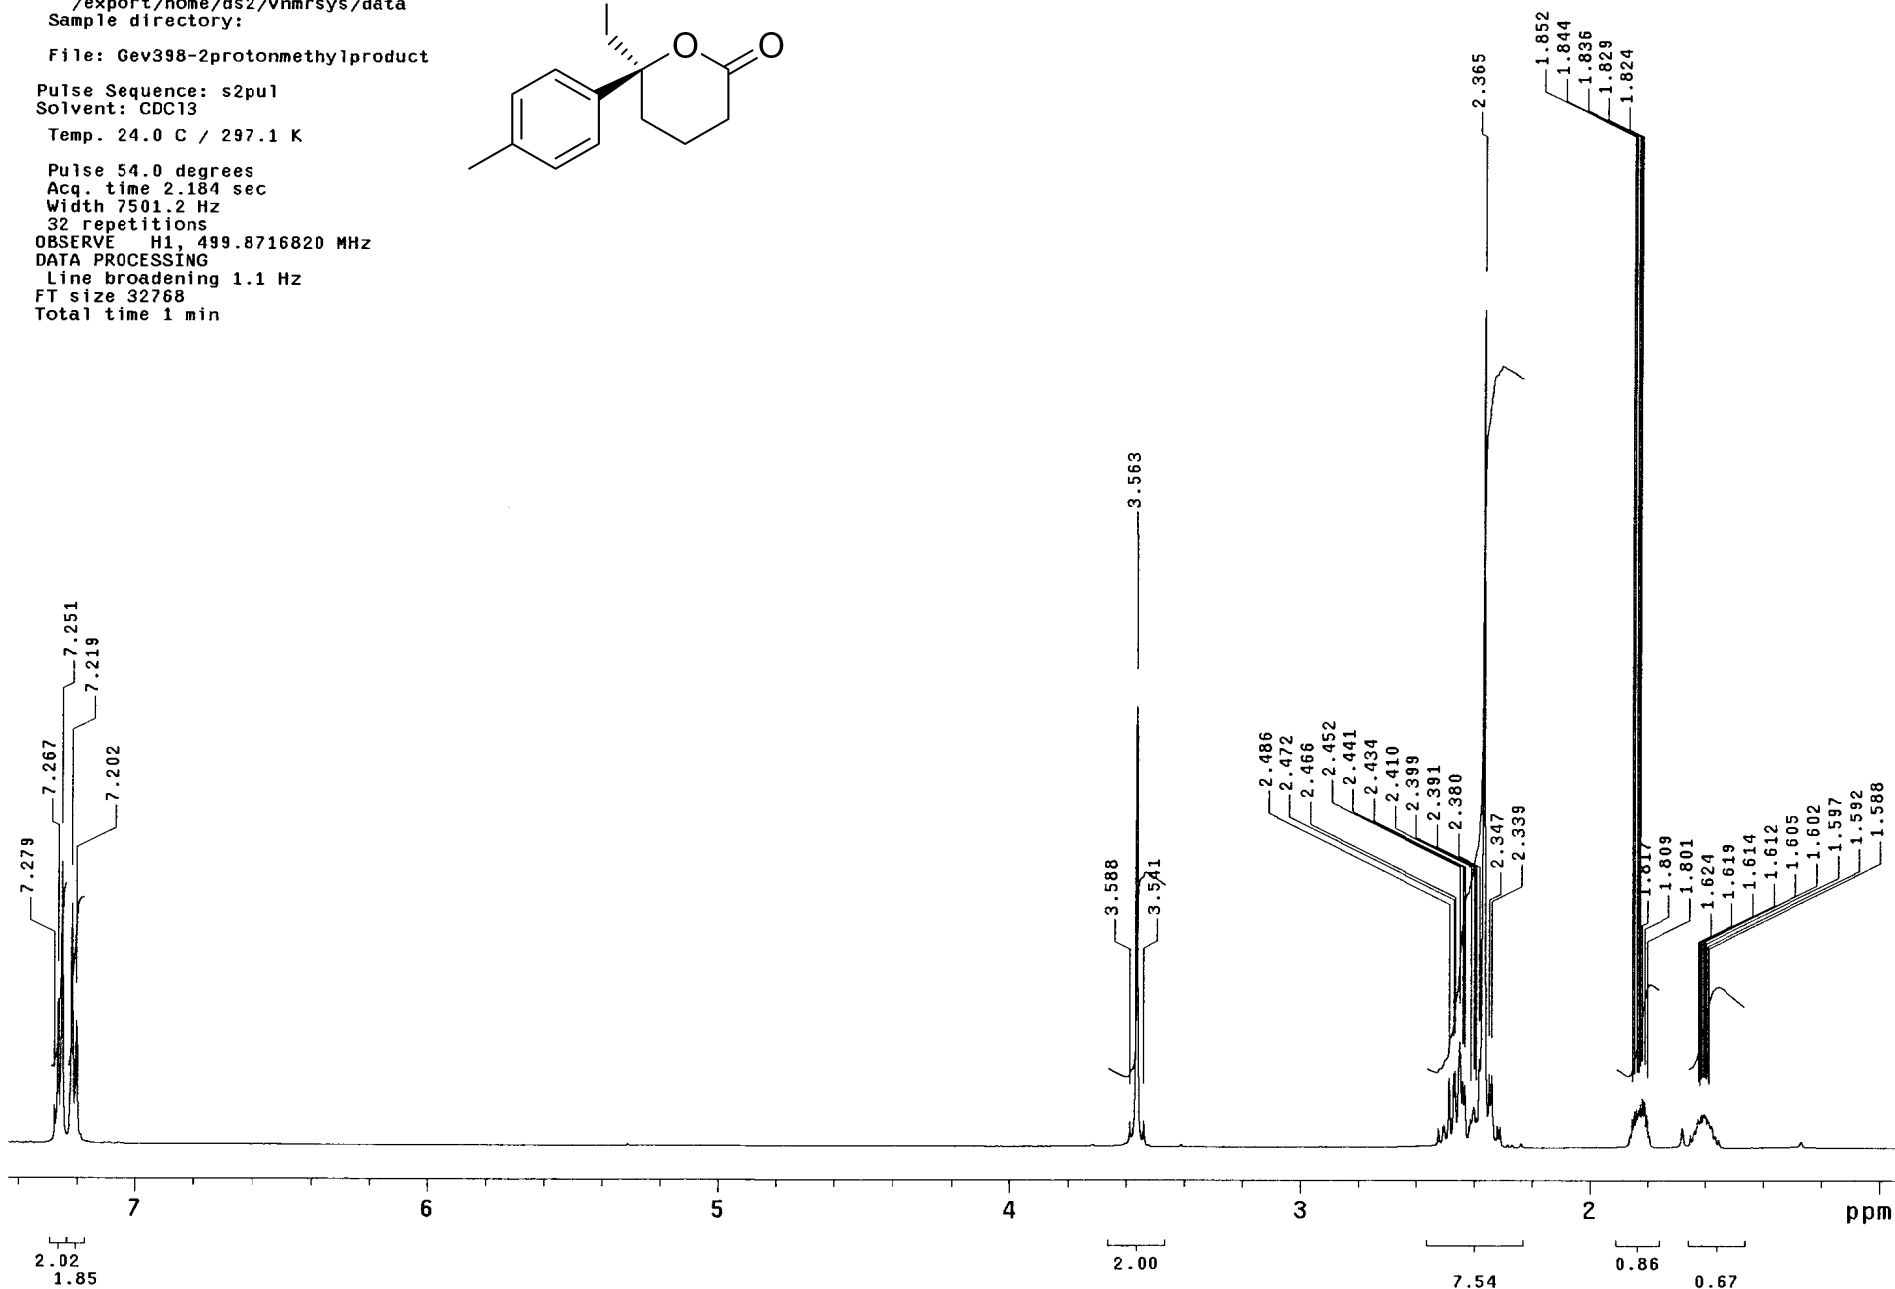

methyl

Pulse Sequence: s2pu1

Solvent: CDC13  
 Temp. 24.0 C / 297.1 K  
 User: 1-14-87  
 INOVA-500 "inova500c"

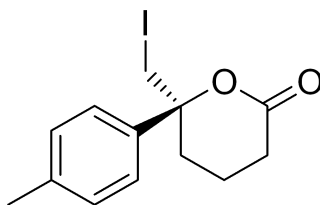

Pulse 30.0 degrees  
 Acq. time 1.092 sec  
 Width 23996.3 Hz  
 64 repetitions  
 OBSERVE C13, 125.6928044 MHz  
 DECOUPLE H1, 499.8741814 MHz  
 Power 48 dB  
 continuously on  
 WALTZ-16 modulated  
 DATA PROCESSING  
 Line broadening 1.0 Hz  
 FT size 65536  
 Total time 1 hr, 15 min, 13 sec

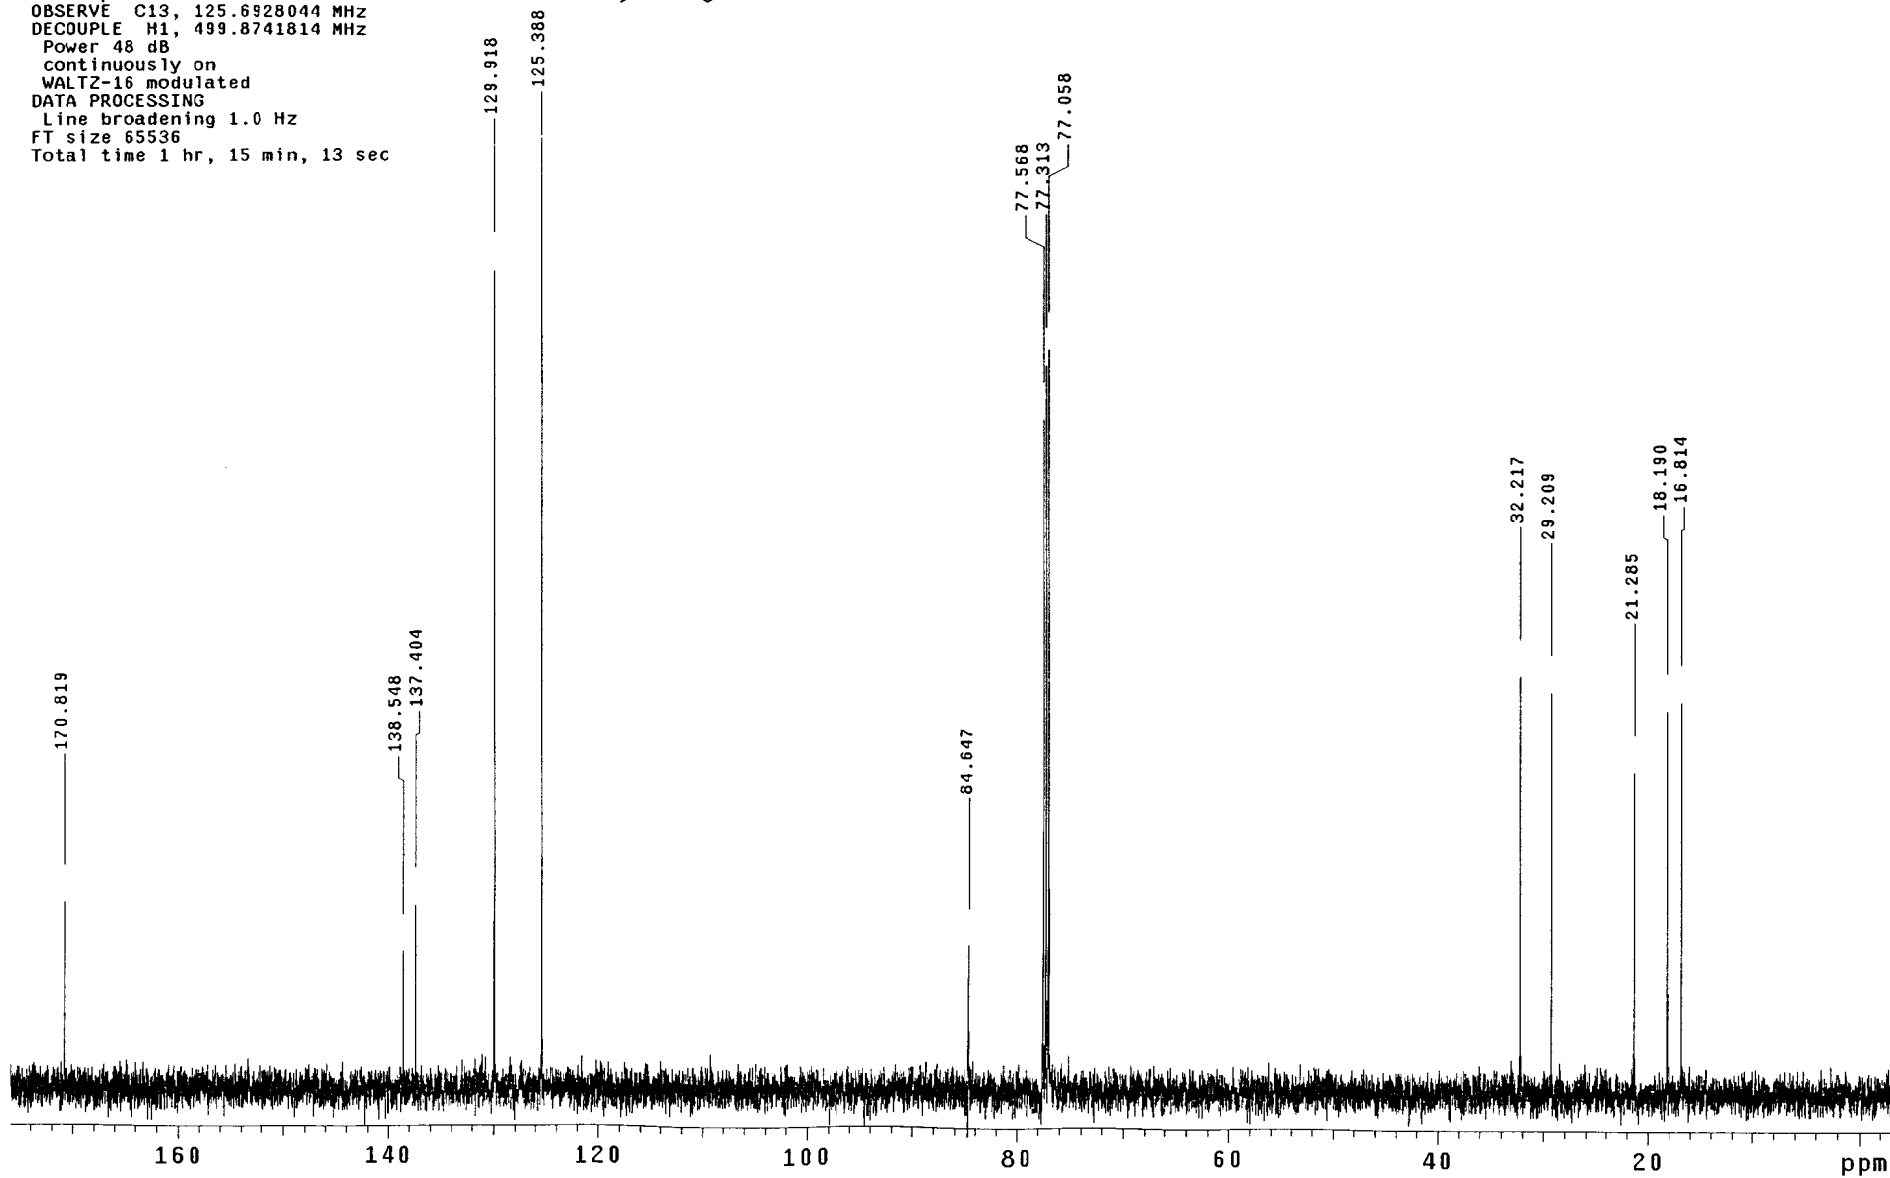

naphthyl

Data Collected on:  
nmrsun2-inova500  
Archive directory:  
/export/home/ds2/vnmrsys/data  
Sample directory:

File: Gev388-2proton

Pulse Sequence: s2pul  
Solvent: CDC13

Temp. 25.0 C / 298.1 K

Pulse 54.0 degrees  
Acq. time 2.184 sec  
Width 7501.2 Hz  
32 repetitions  
OBSERVE H1, 499.8716820 MHz  
DATA PROCESSING  
Line broadening 1.1 Hz  
FT size 32768  
Total time 1 min

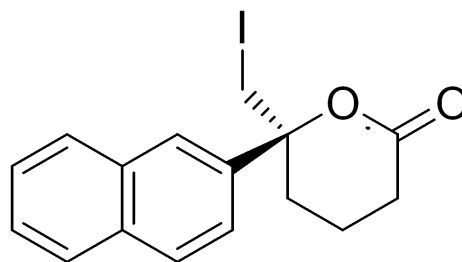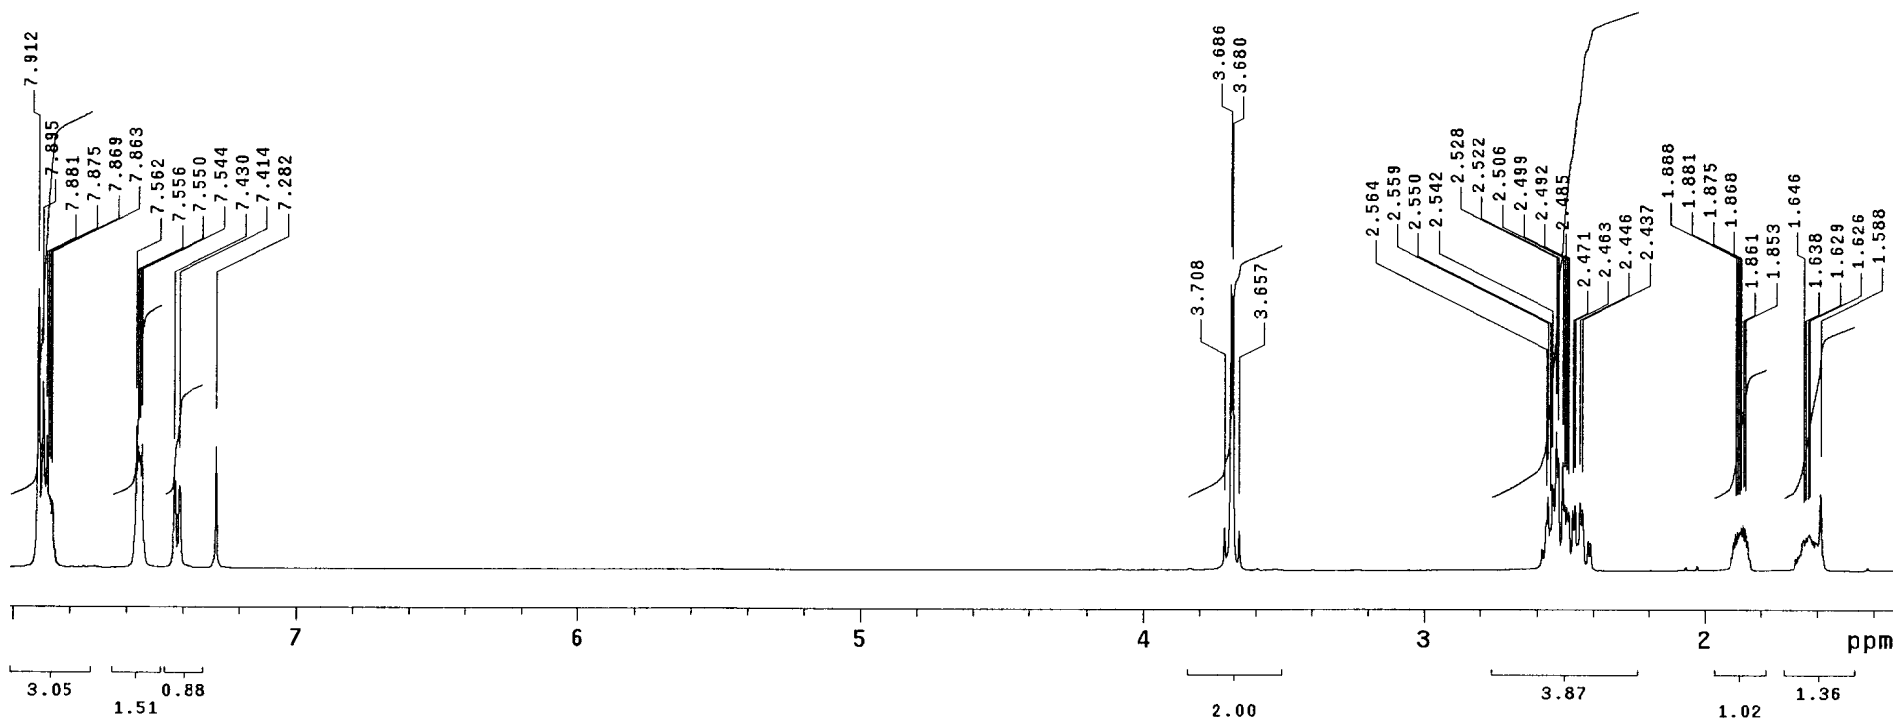

Pulse Sequence: s2pu1  
Solvent: CDC13  
Temp. 25.0 C / 298.1 K  
User: 1-14-87  
INOVA-500 "inova500c"

Pulse 30.0 degrees  
Acq. time 1.092 sec  
Width 29996.3 Hz  
1536 repetitions  
OBSERVE C13, 125.6928044 MHz  
DECOUPLE H1, 499.8741814 MHz  
Power 48 dB  
continuously on  
WALTZ-16 modulated  
DATA PROCESSING  
Line broadening 1.0 Hz  
FT size 65536  
Total time 1 hr, 15 min, 13 sec

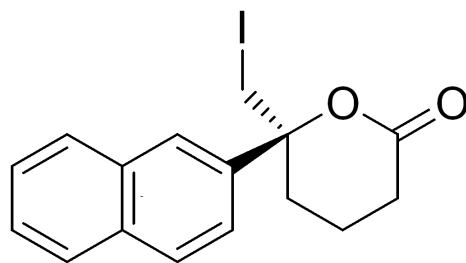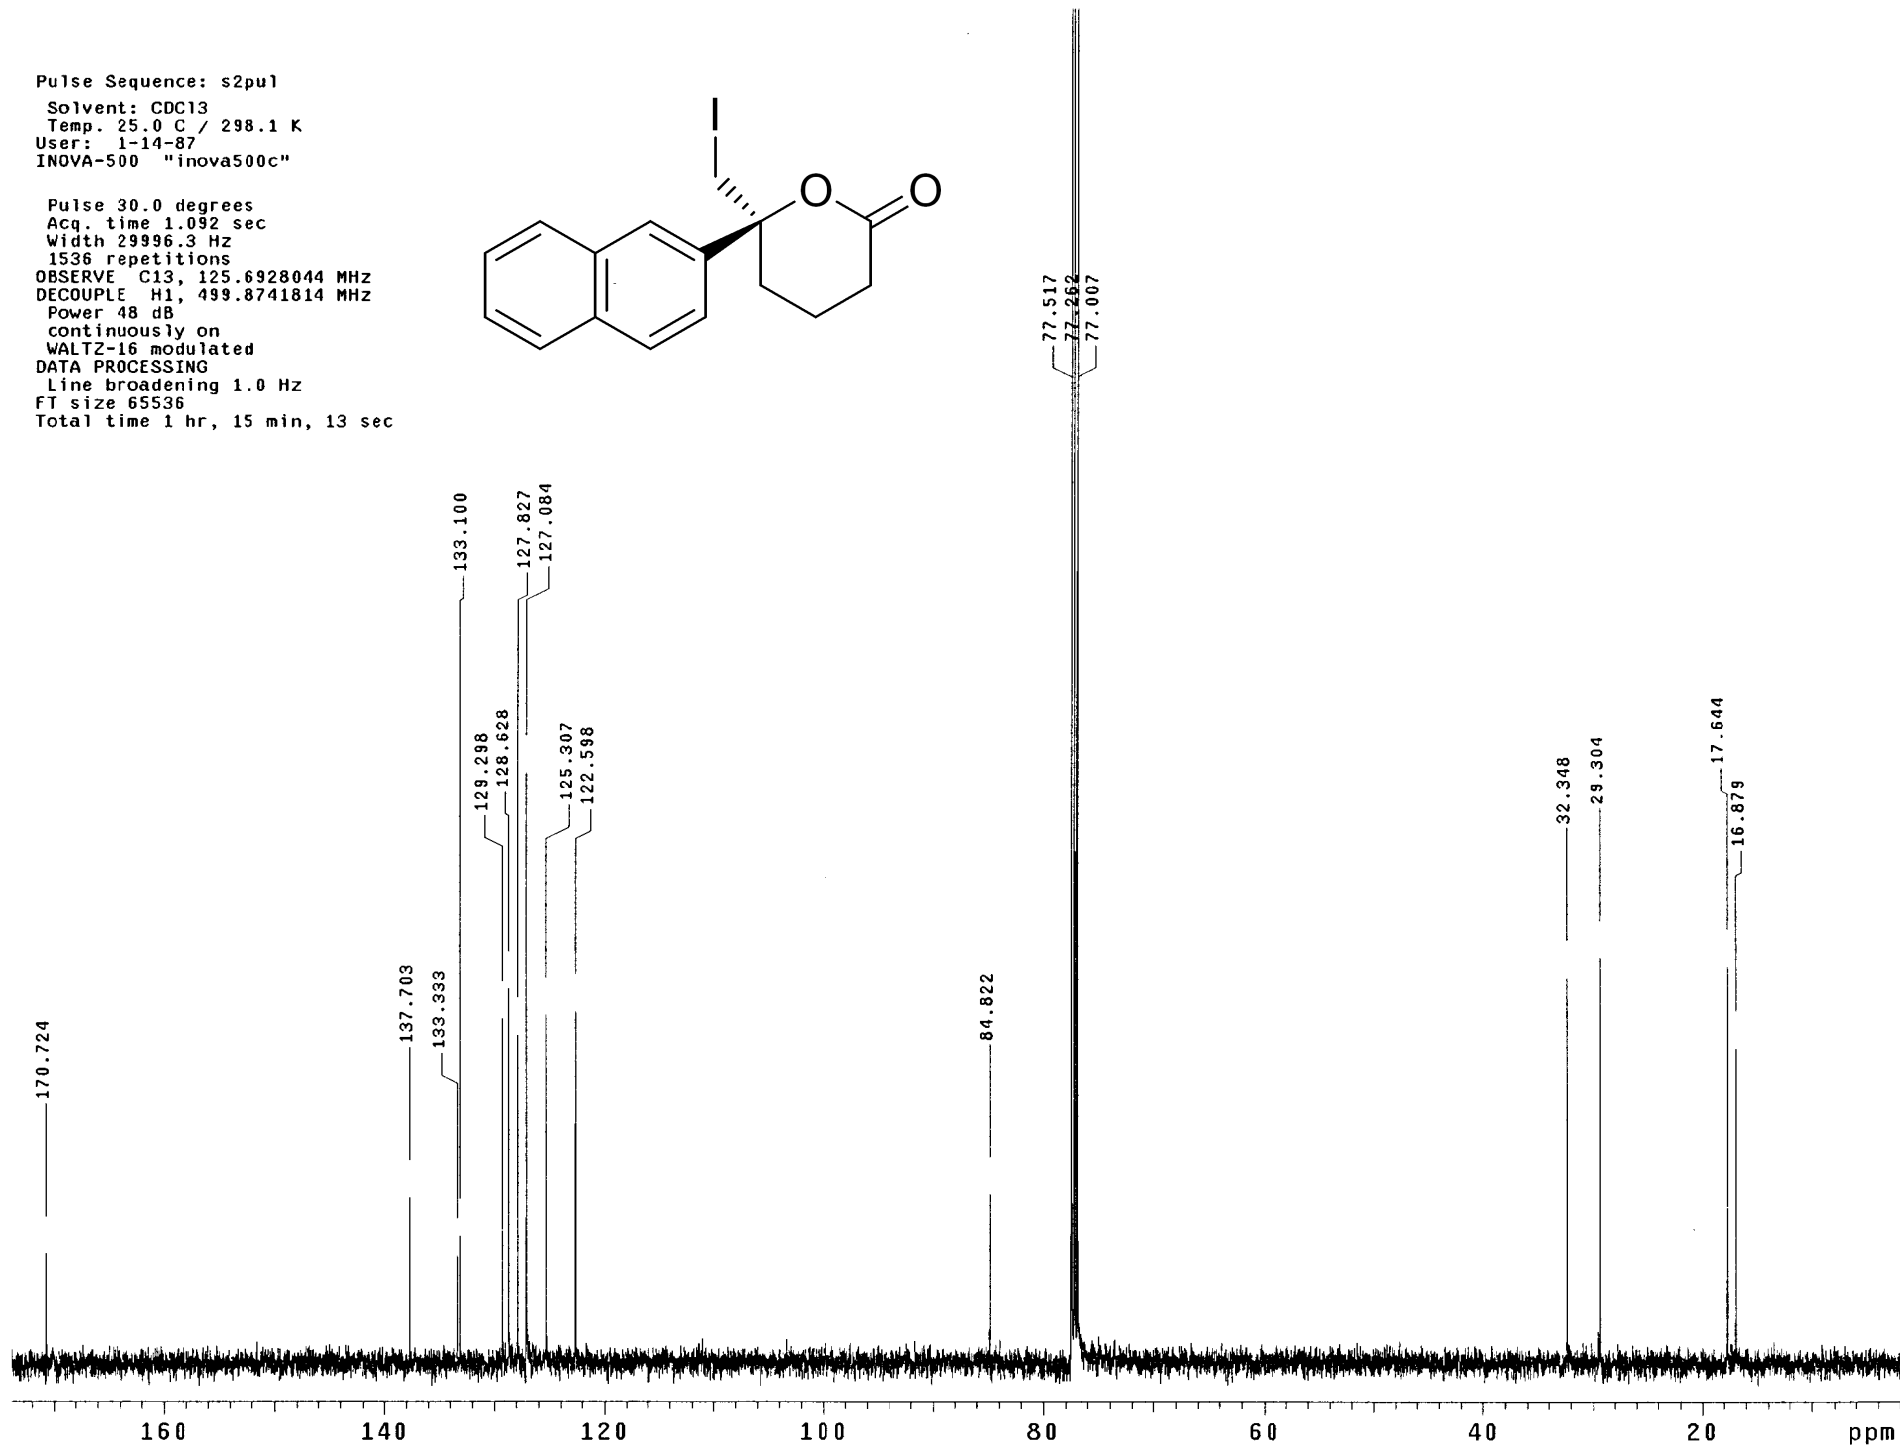

STANDARD PROTON PARAMETERS

exp1 PROTON

|             |             |            |          |
|-------------|-------------|------------|----------|
| SAMPLE      |             | SPECIAL    |          |
| date        | Jun 11 2010 | temp       | 22.0     |
| solvent     | CDC13       | gain       | 12       |
| file        | exp         | spin       | not used |
| ACQUISITION |             | hst        | 0.008    |
| sw          | 9596.9      | pw90       | 6.300    |
| at          | 3.414       | alfa       | 0        |
| np          | 65536       | FLAGS      |          |
| fb          | 5000        | il         | n        |
| bs          | 4           | in         | n        |
| ss          | 2           | dp         | y        |
| d1          | 1.000       | hs         | nn       |
| nt          | 32          | PROCESSING |          |
| ct          | 0           | lb         | 0.10     |
| TRANSMITTER |             | fn         | 131072   |
| tn          | H1          | DISPLAY    |          |
| sfrq        | 599.790     | sp         | -141.6   |
| tof         | 576.6       | wp         | 4867.1   |
| tpwr        | 60          | rfl        | 1199.7   |
| pw          | 4.200       | rfp        | 0        |
| DECOUPLER   |             | rp         | 118.6    |
| dn          | C13         | lp         | -16.8    |
| dof         | 0           | PLOT       |          |
| dm          | nnn         | wc         | 250      |
| decwave     | waltz       | sc         | 0        |
| dpwr        | 49          | vs         | 129      |
| dmf         | 14500       | th         | 7        |
|             |             | nm         | cdc ph   |

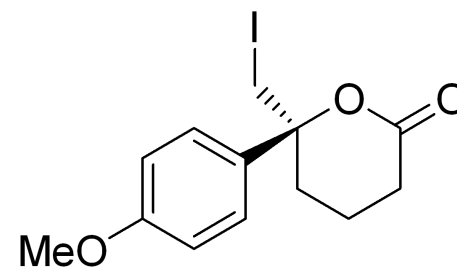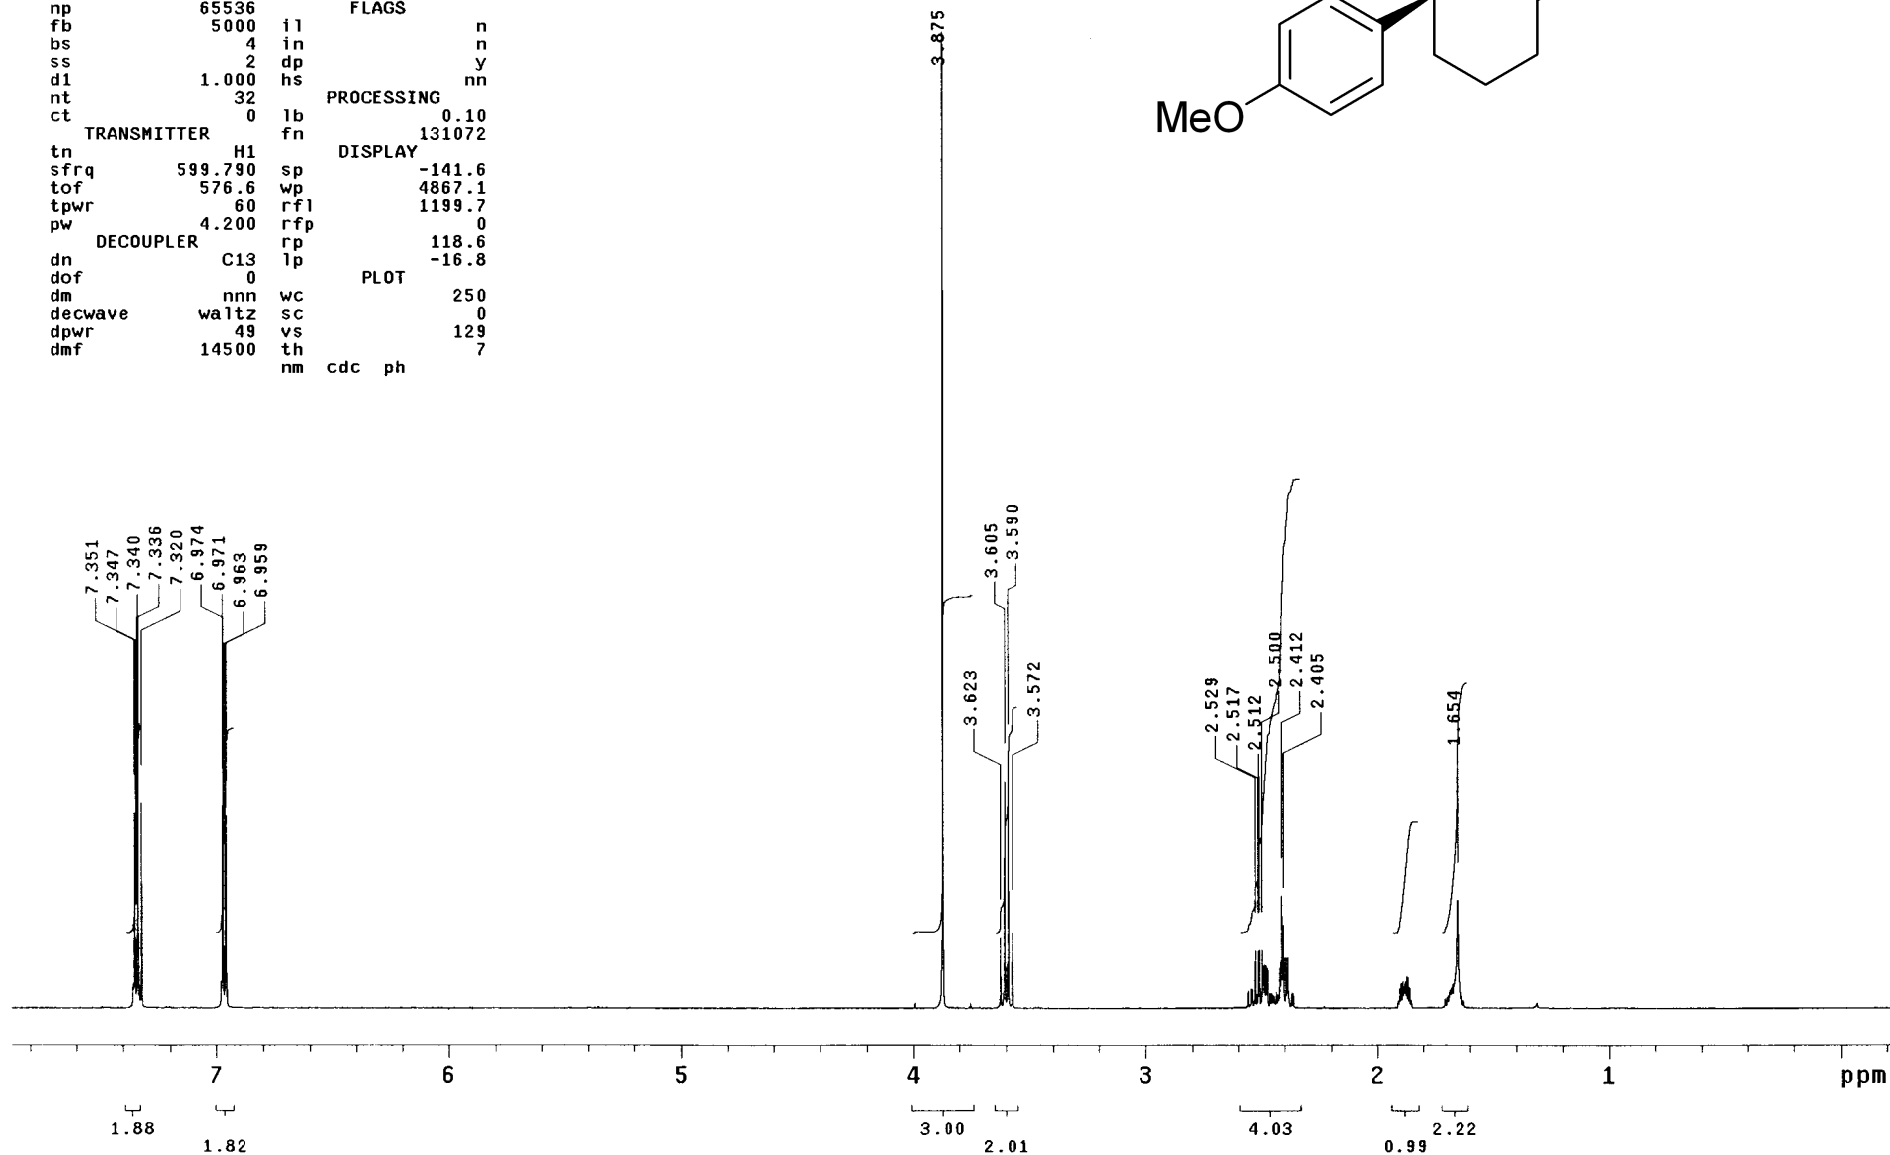

Pulse Sequence: s2pul  
Solvent: CDC13  
Temp. 25.0 C / 298.1 K  
User: 1-14-87  
INOVA-500 "inova500c"

Pulse 30.0 degrees  
Acq. time 1.092 sec  
Width 29996.3 Hz  
640 repetitions  
OBSERVE C13, 125.6928044 MHz  
DECOUPLE H1, 499.8741814 MHz  
Power 48 dB  
continuously on  
WALTZ-16 modulated  
DATA PROCESSING  
Line broadening 1.0 Hz  
FT size 65536  
Total time 1 hr, 15 min, 13 sec

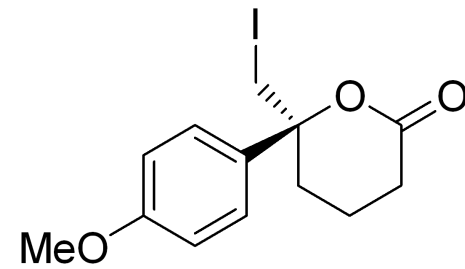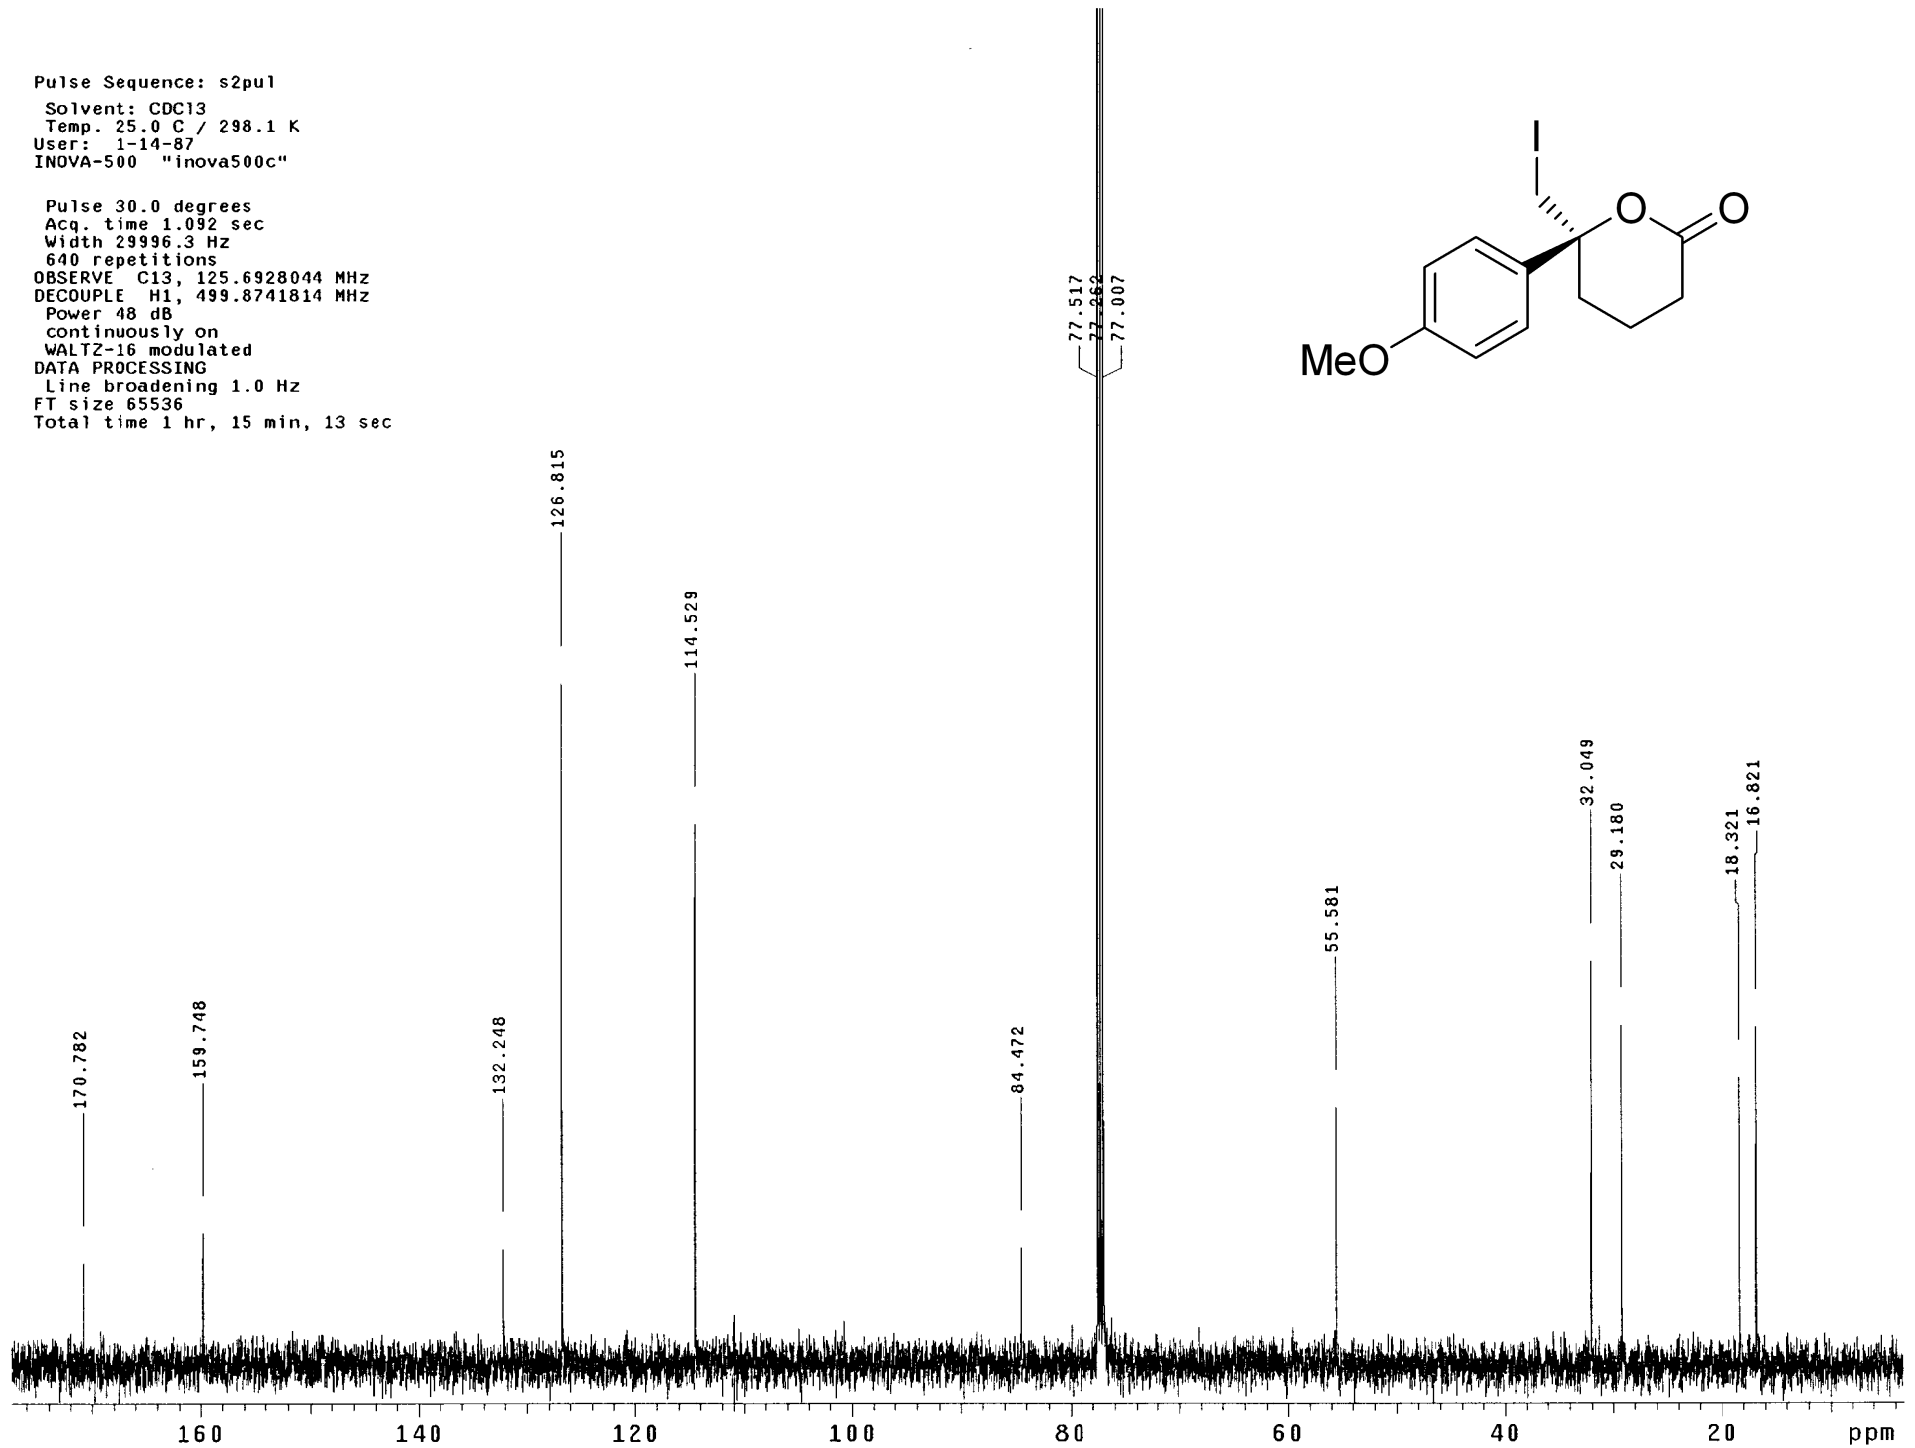



Data Collected on:  
nmrsun2-inova500  
Archive directory:  
/export/home/ds2/vnmrsys/data  
Sample directory:

File: Gev392-4proton

Pulse Sequence: s2pu1  
Solvent: CDC13

Temp. 24.0 C / 297.1 K

Pulse 54.0 degrees  
Acq. time 2.184 sec  
Width 7501.2 Hz  
32 repetitions

OBSERVE H1, 499.8716820 MHz

DATA PROCESSING

Line broadening 1.1 Hz

FT size 32768

Total time 1 min

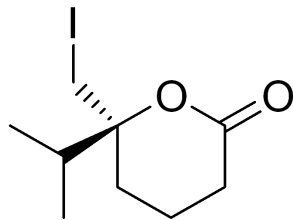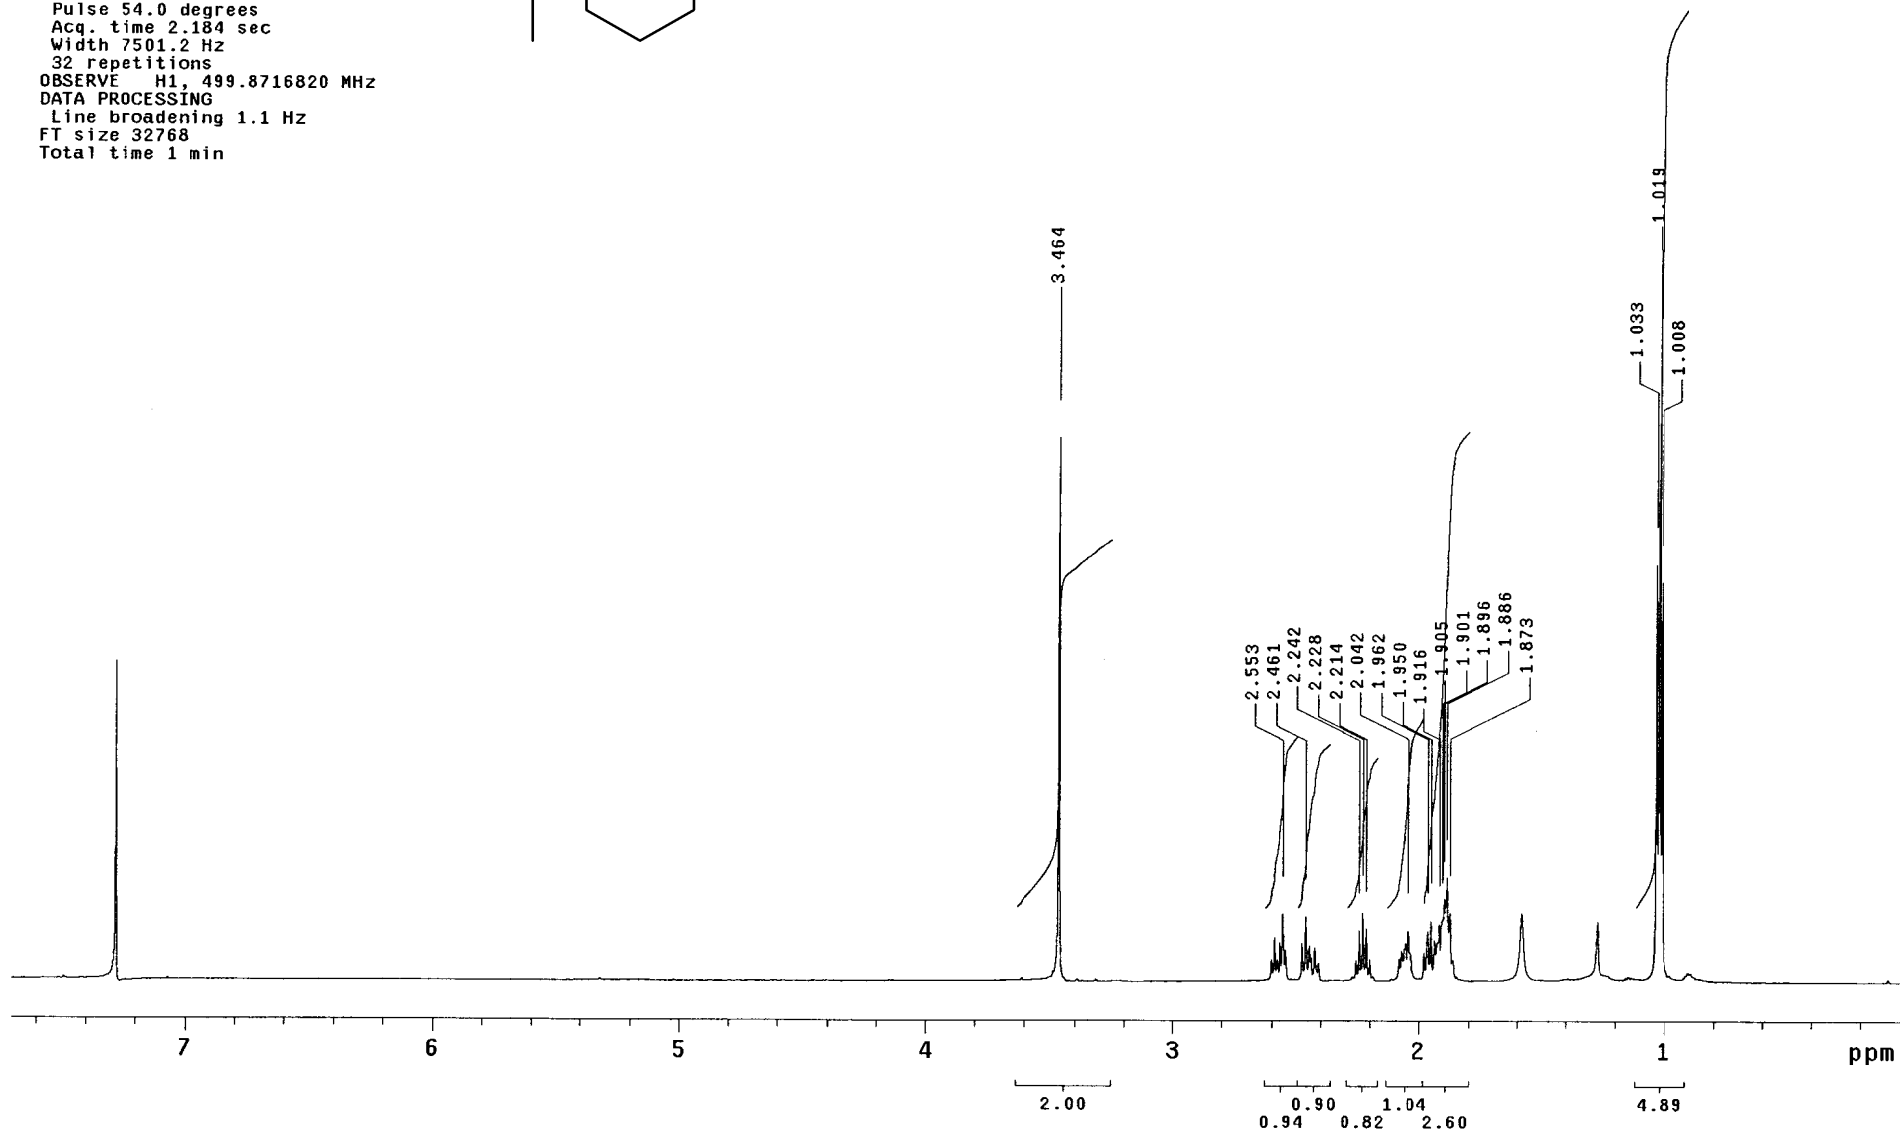

Pulse Sequence: s2pul  
 Solvent: CDC13  
 Temp. 24.0 C / 297.1 K  
 User: 1-14-87  
 INOVA-500 "inova500c"

Pulse 30.0 degrees  
 Acq. time 1.092 sec  
 Width 29996.3 Hz  
 1344 repetitions  
 OBSERVE C13, 125.6928044 MHz  
 DECOUPLE H1, 499.8741814 MHz  
 Power 48 dB  
 continuously on  
 WALTZ-16 modulated  
 DATA PROCESSING  
 Line broadening 1.0 Hz  
 FT size 65536  
 Total time 1 hr, 15 min, 13 sec

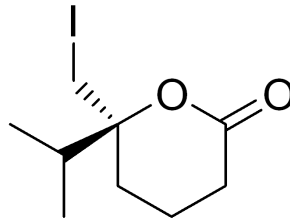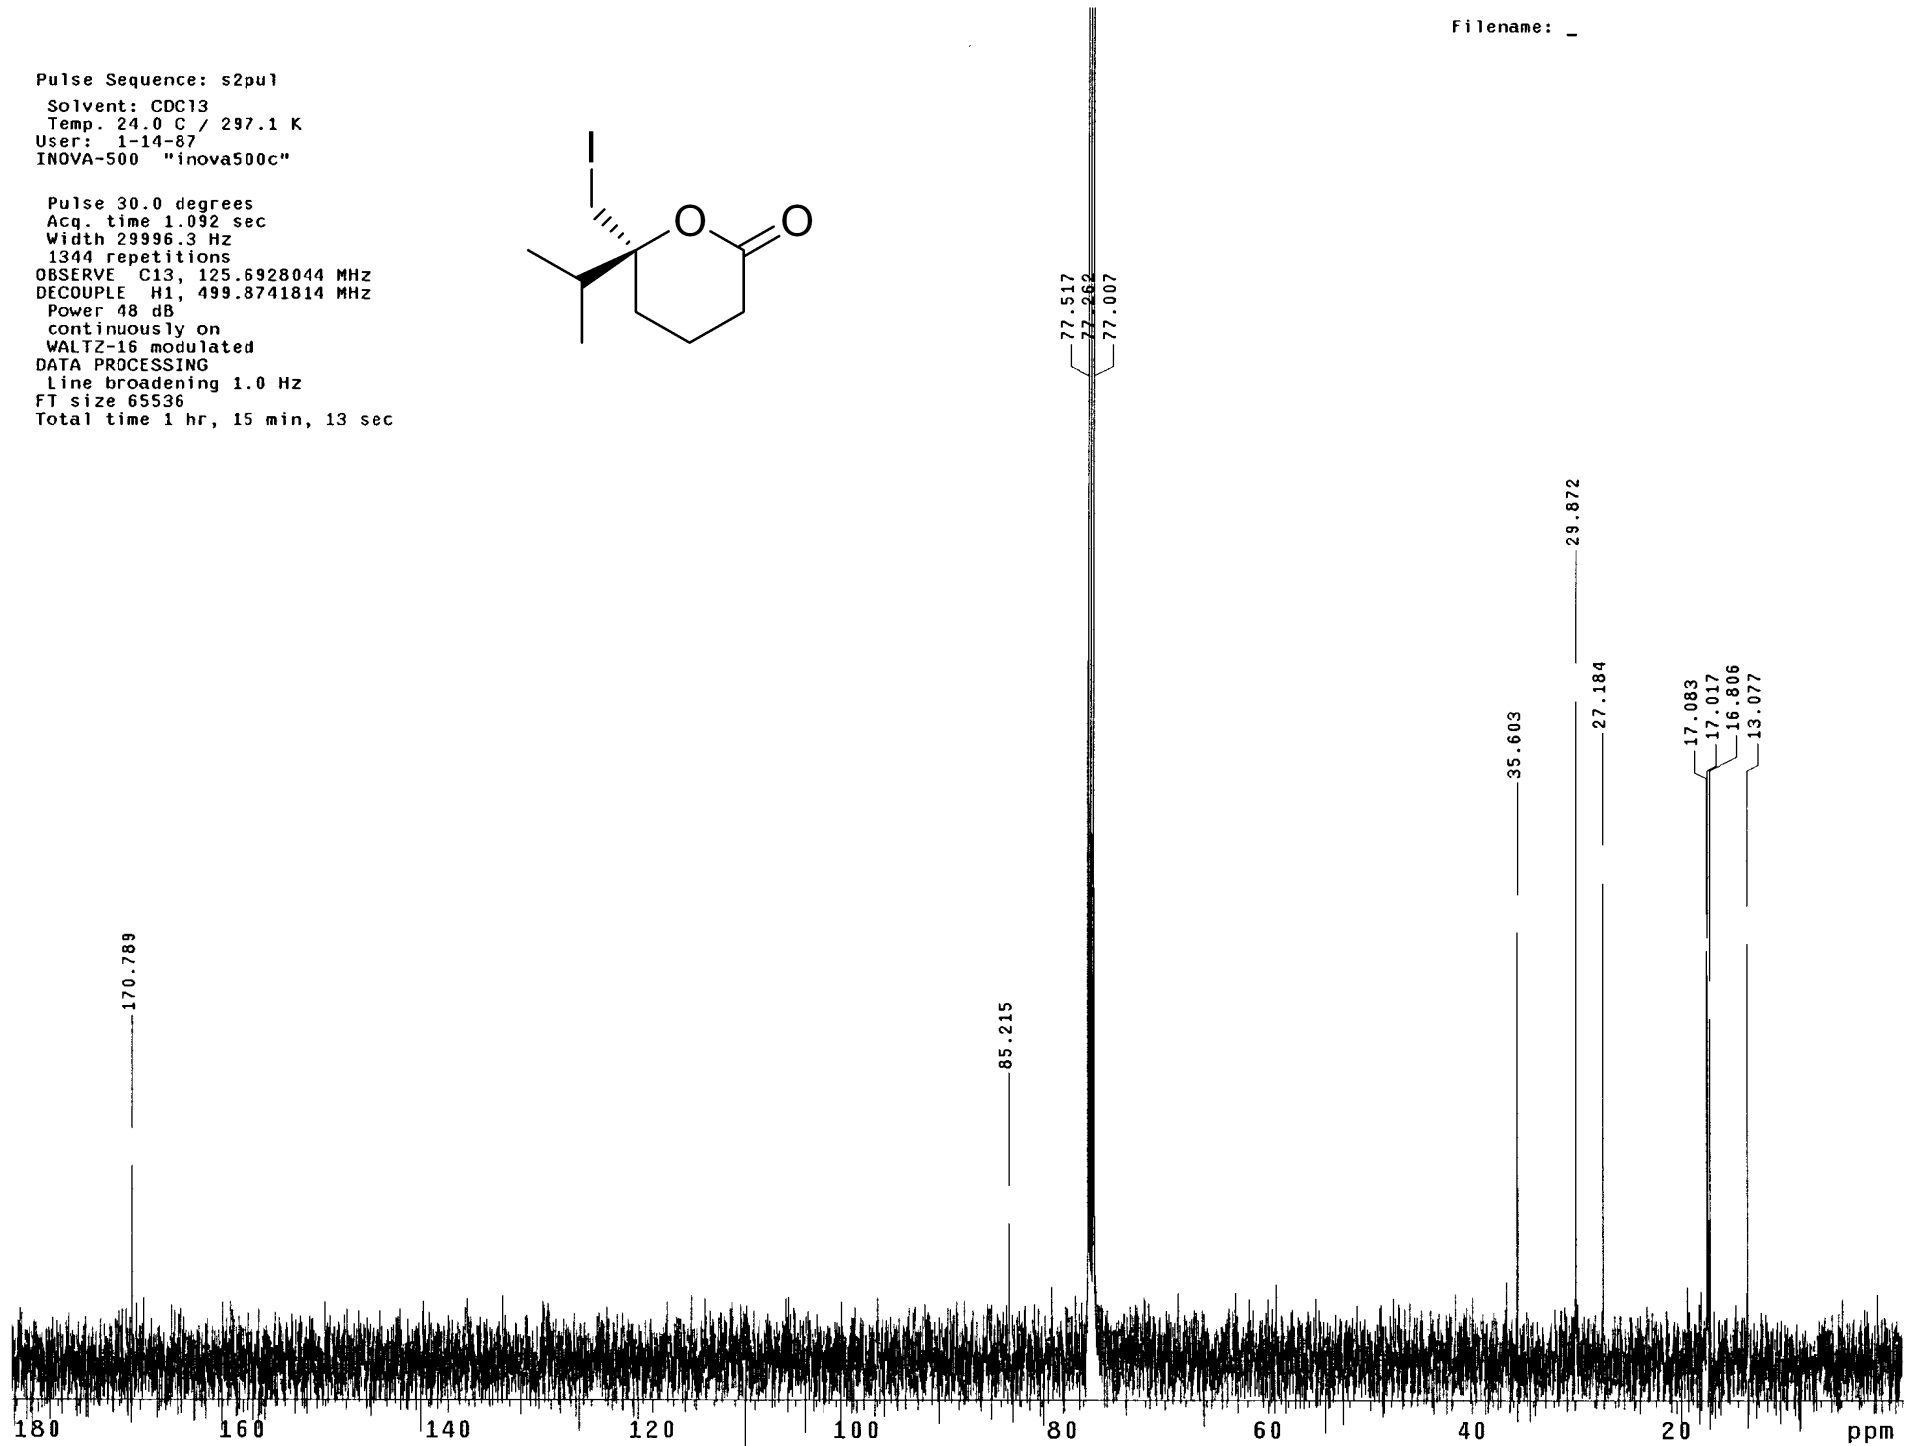

gemdimethyl

Pulse Sequence: s2pu1

Solvent: CDC13  
Temp. 24.0 C / 297.1 K  
INOVA-500 "inova500c"

Pulse 54.0 degrees  
Acq. time 2.184 sec  
Width 7501.2 Hz  
32 repetitions  
OBSERVE H1, 499.8716820 MHz  
DATA PROCESSING  
Line broadening 1.1 Hz  
FT size 32768  
Total time 1 min, 14 sec

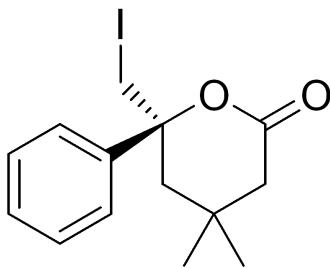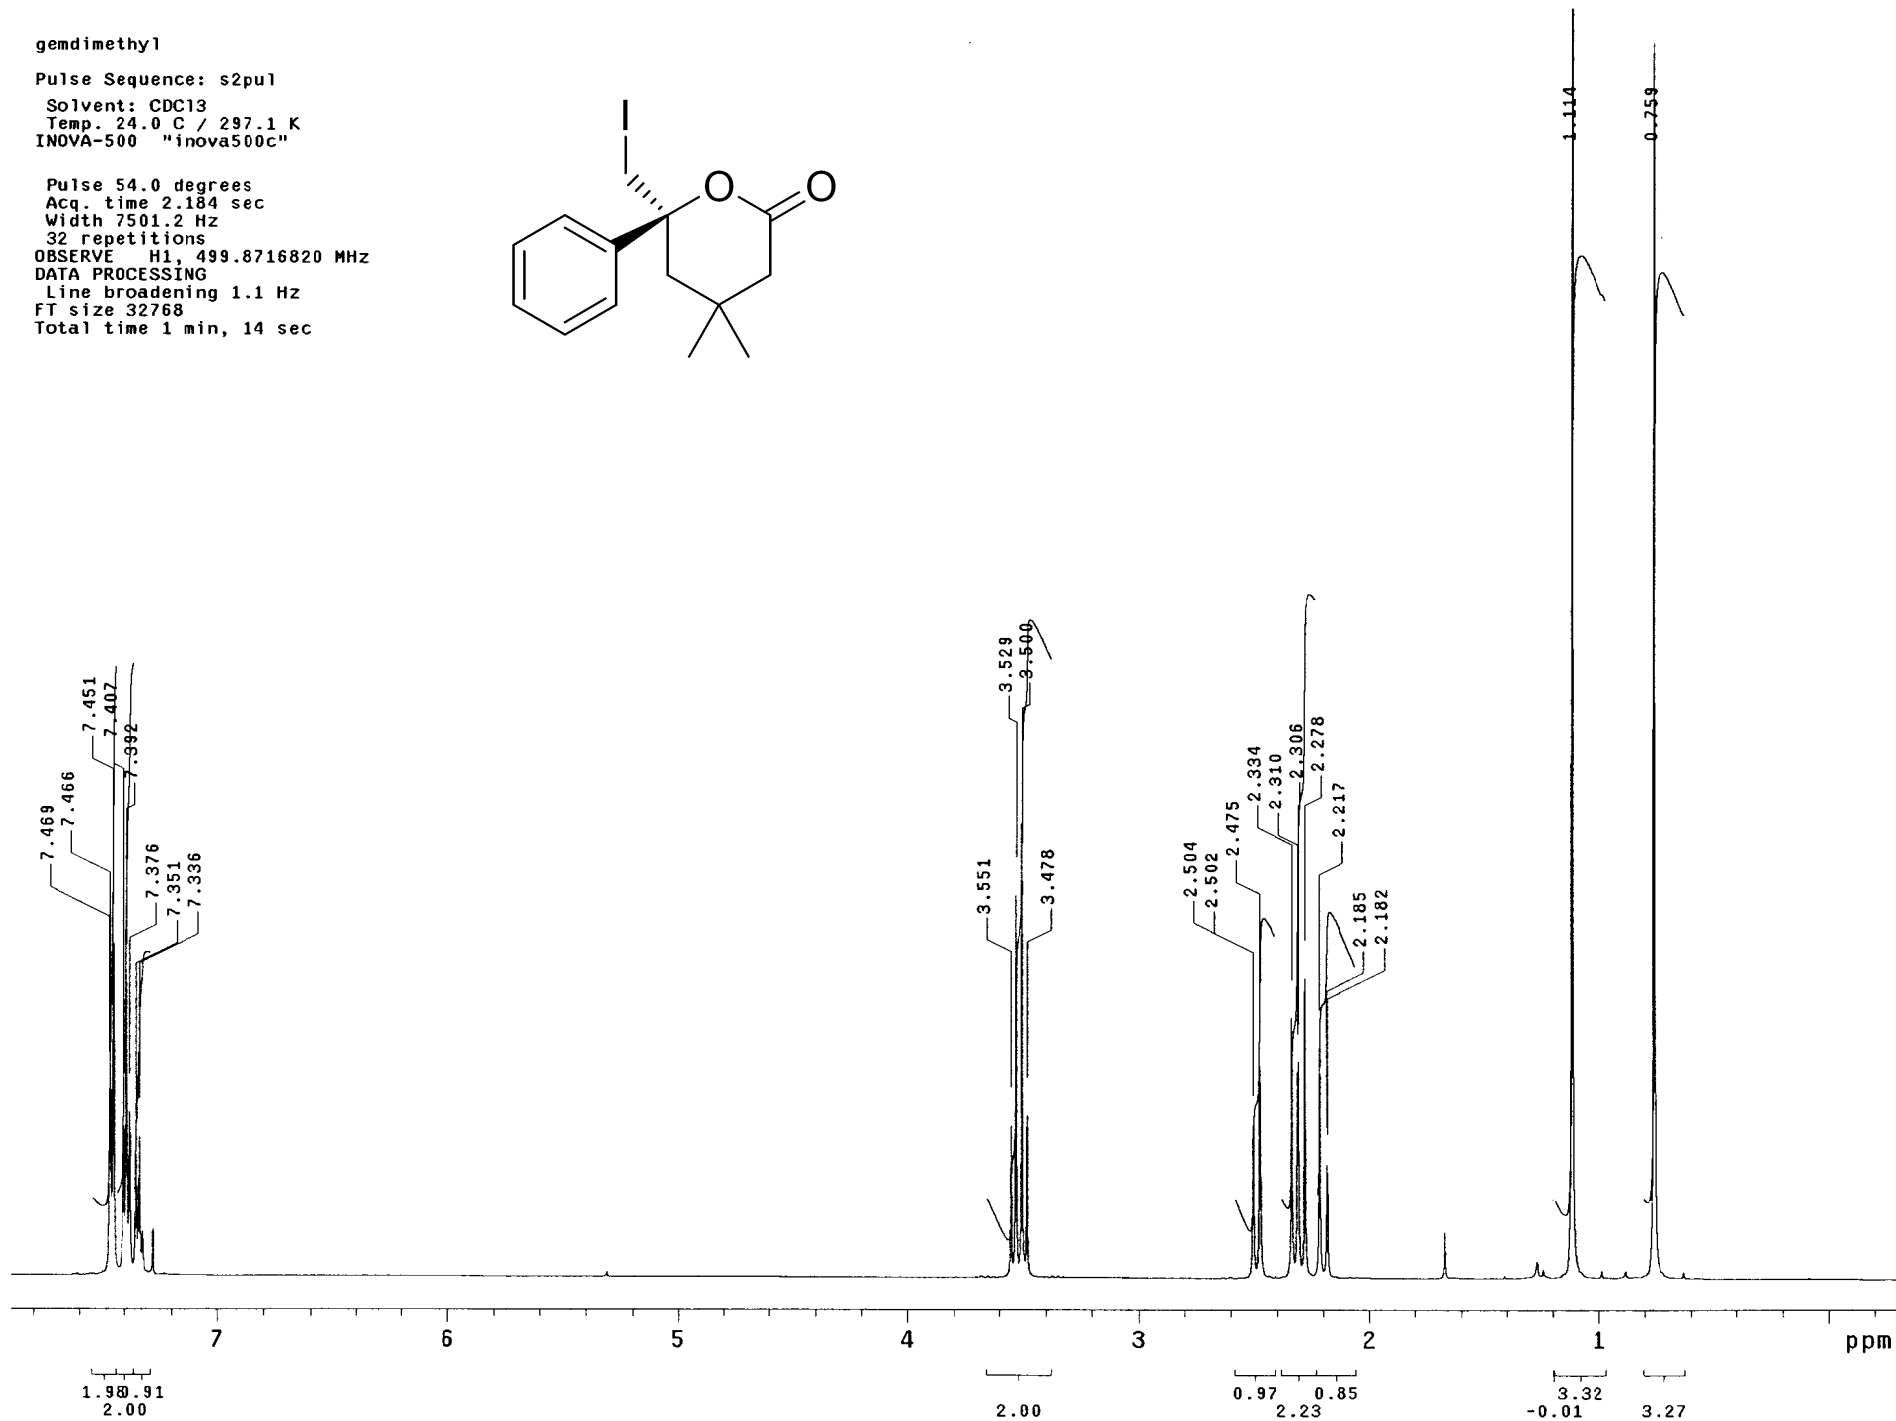

gemdimethyl

Pulse Sequence: s2pu1

Solvent: CDC13  
Temp. 24.0 C / 297.1 K  
User: 1-14-87  
INOVA-500 "inova500c"

Pulse 30.0 degrees  
Acq. time 1.092 sec  
Width 29996.3 Hz  
192 repetitions  
OBSERVE C13, 125.6928044 MHz  
DECOUPLE H1, 499.8741814 MHz  
Power 48 dB  
continuously on  
WALTZ-16 modulated  
DATA PROCESSING  
Line broadening 1.0 Hz  
FT size 65536  
Total time 1 hr, 15 min, 13 sec

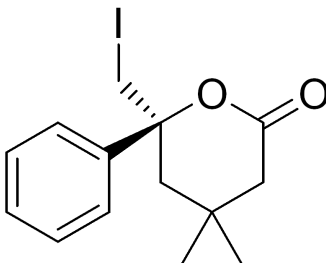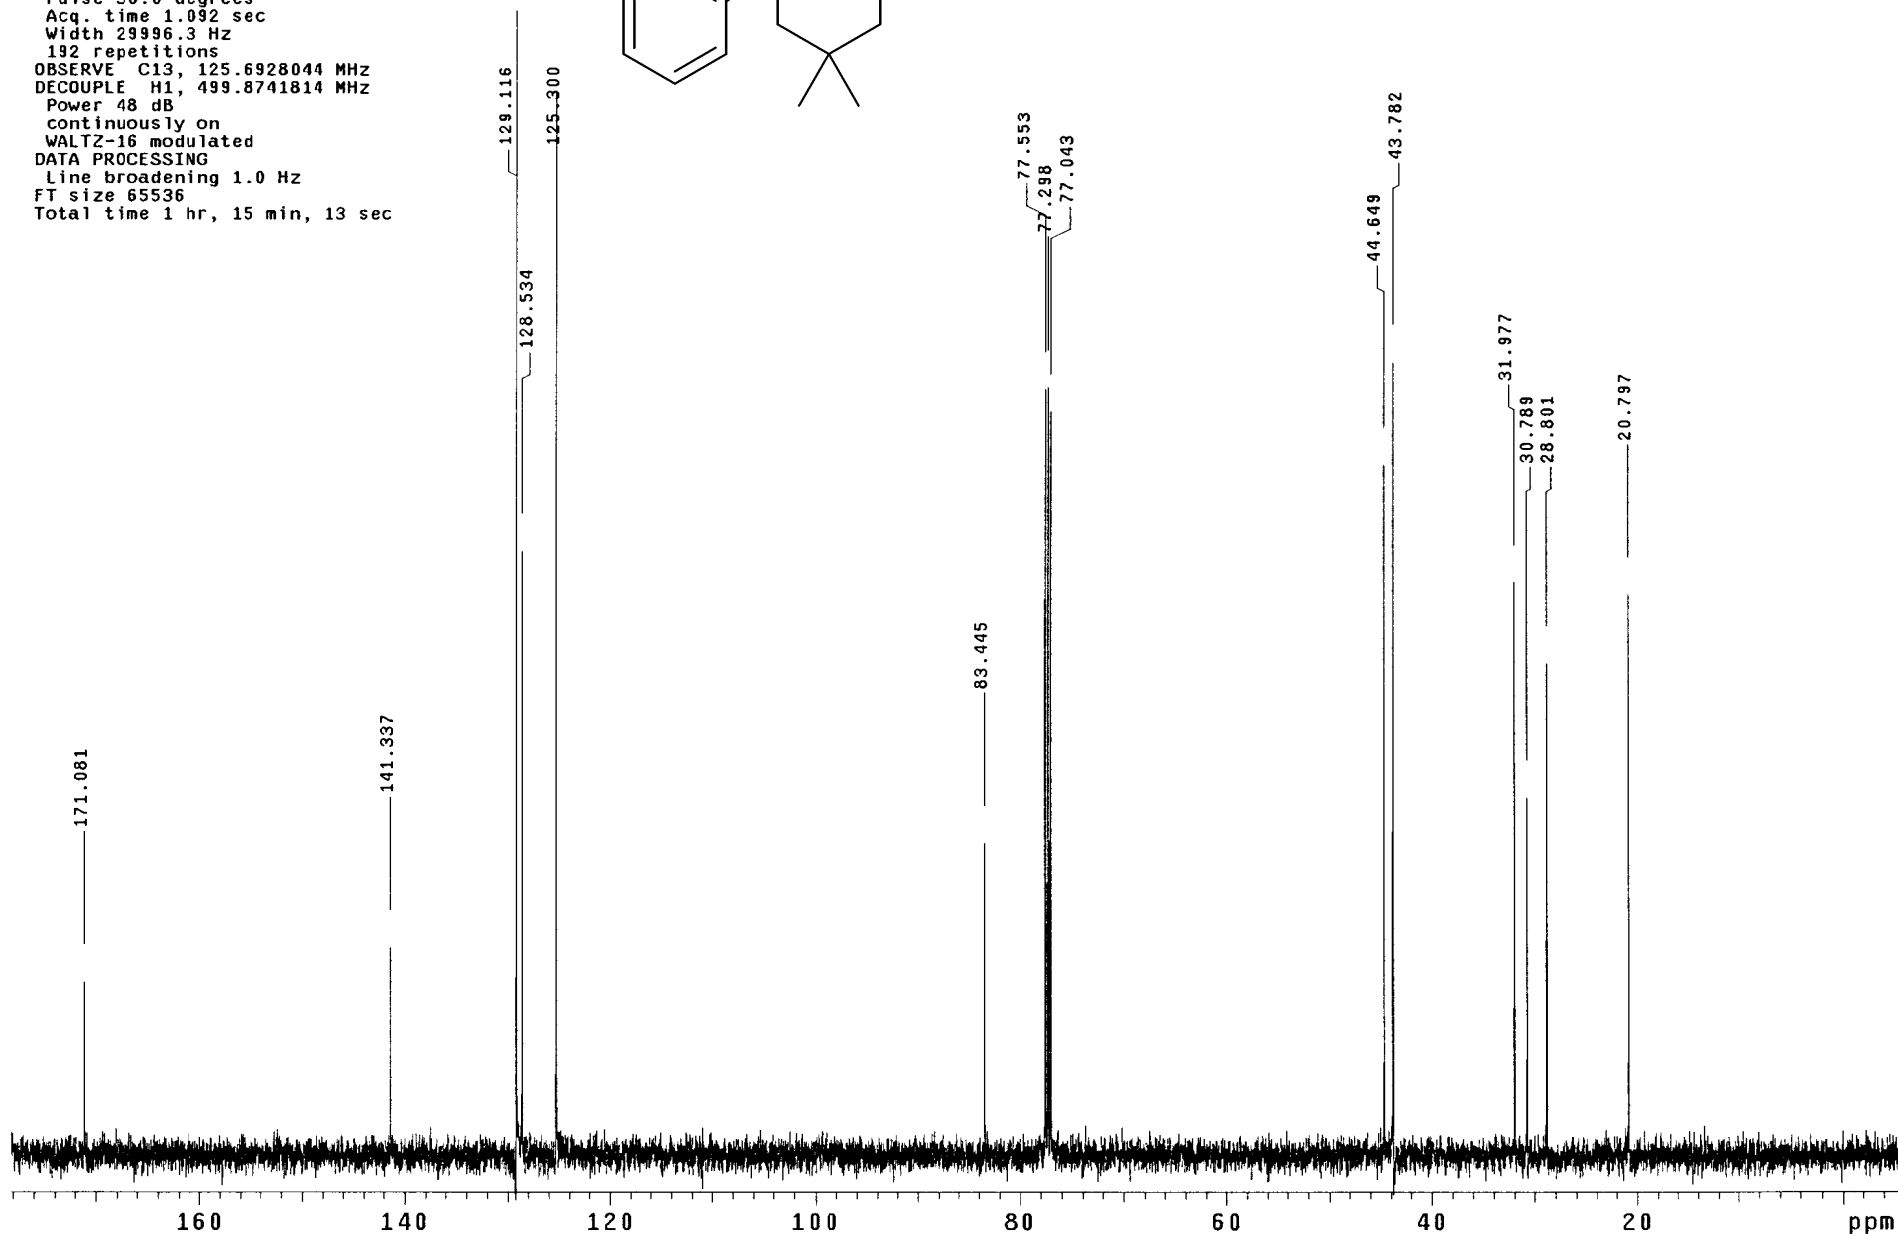

bromo

Pulse Sequence: s2pu1

Solvent: CDC13  
 Temp. 25.0 C / 298.1 K  
 INOVA-500 "inova500c"

Pulse 54.0 degrees  
 Acq. time 2.184 sec  
 Width 7501.2 Hz  
 64 repetitions  
 OBSERVE H1, 499.8716820 MHz  
 DATA PROCESSING  
 Line Broadening 1.1 Hz  
 FT size 32768  
 Total time 2 min, 24 sec

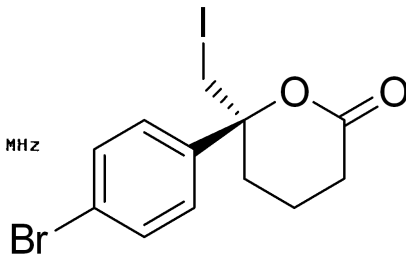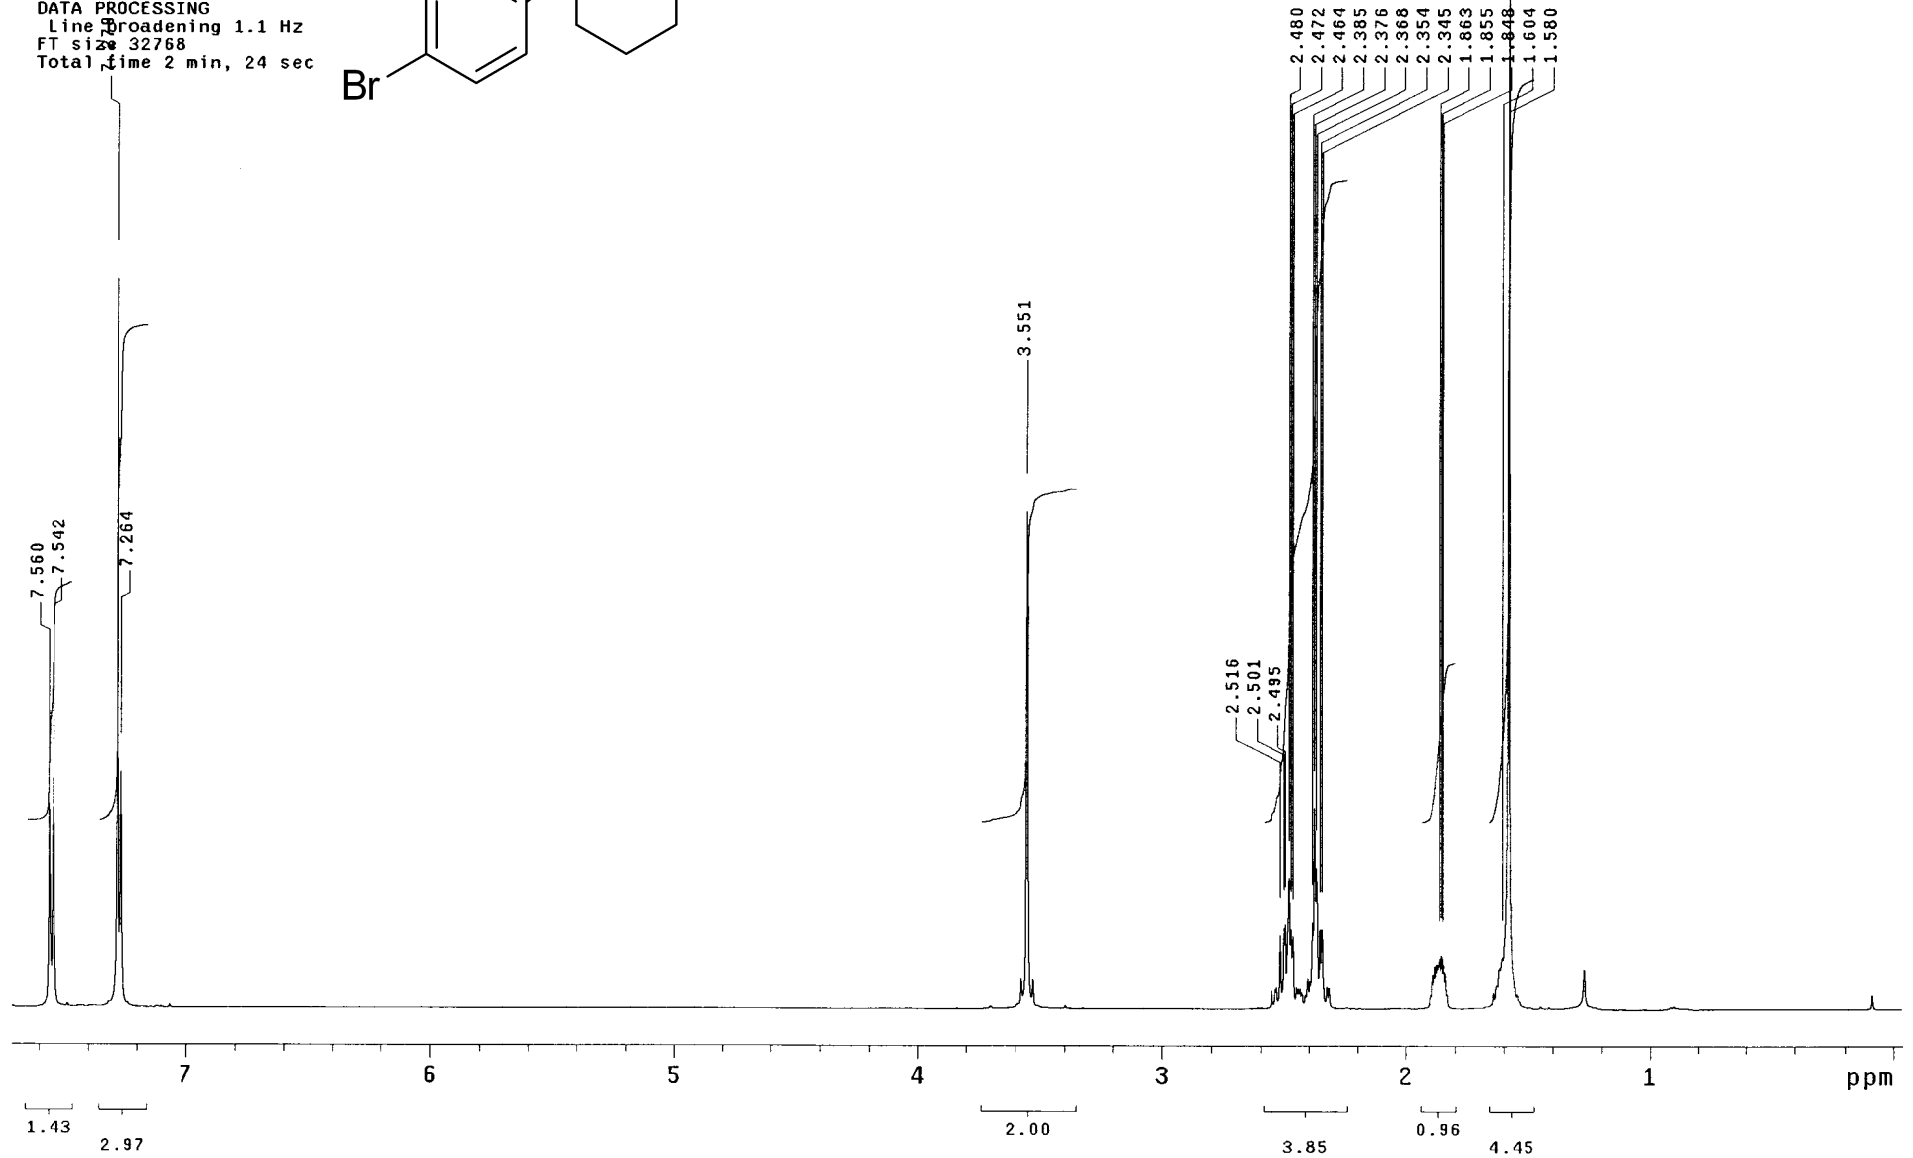

Pulse Sequence: s2pu1  
Solvent: CDCl3  
Temp. 25.0 C / 298.1 K  
User: 1-14-87  
INOVA-500 "inova500c"

Pulse 30.0 degrees  
Acq. time 1.092 sec  
Width 29996.3 Hz  
1792 repetitions  
OBSERVE C13, 125.6928044 MHz  
DECOUPLE H1, 499.8741814 MHz  
Power 48 dB  
continuously on  
WALTZ-16 modulated  
DATA PROCESSING  
Line broadening 1.0 Hz  
FT size 65536  
Total time 1 hr, 15 min, 13 sec

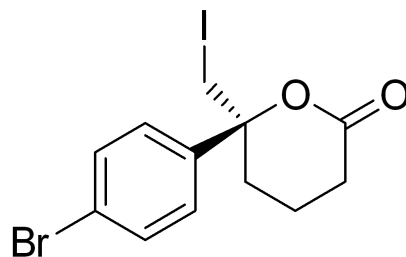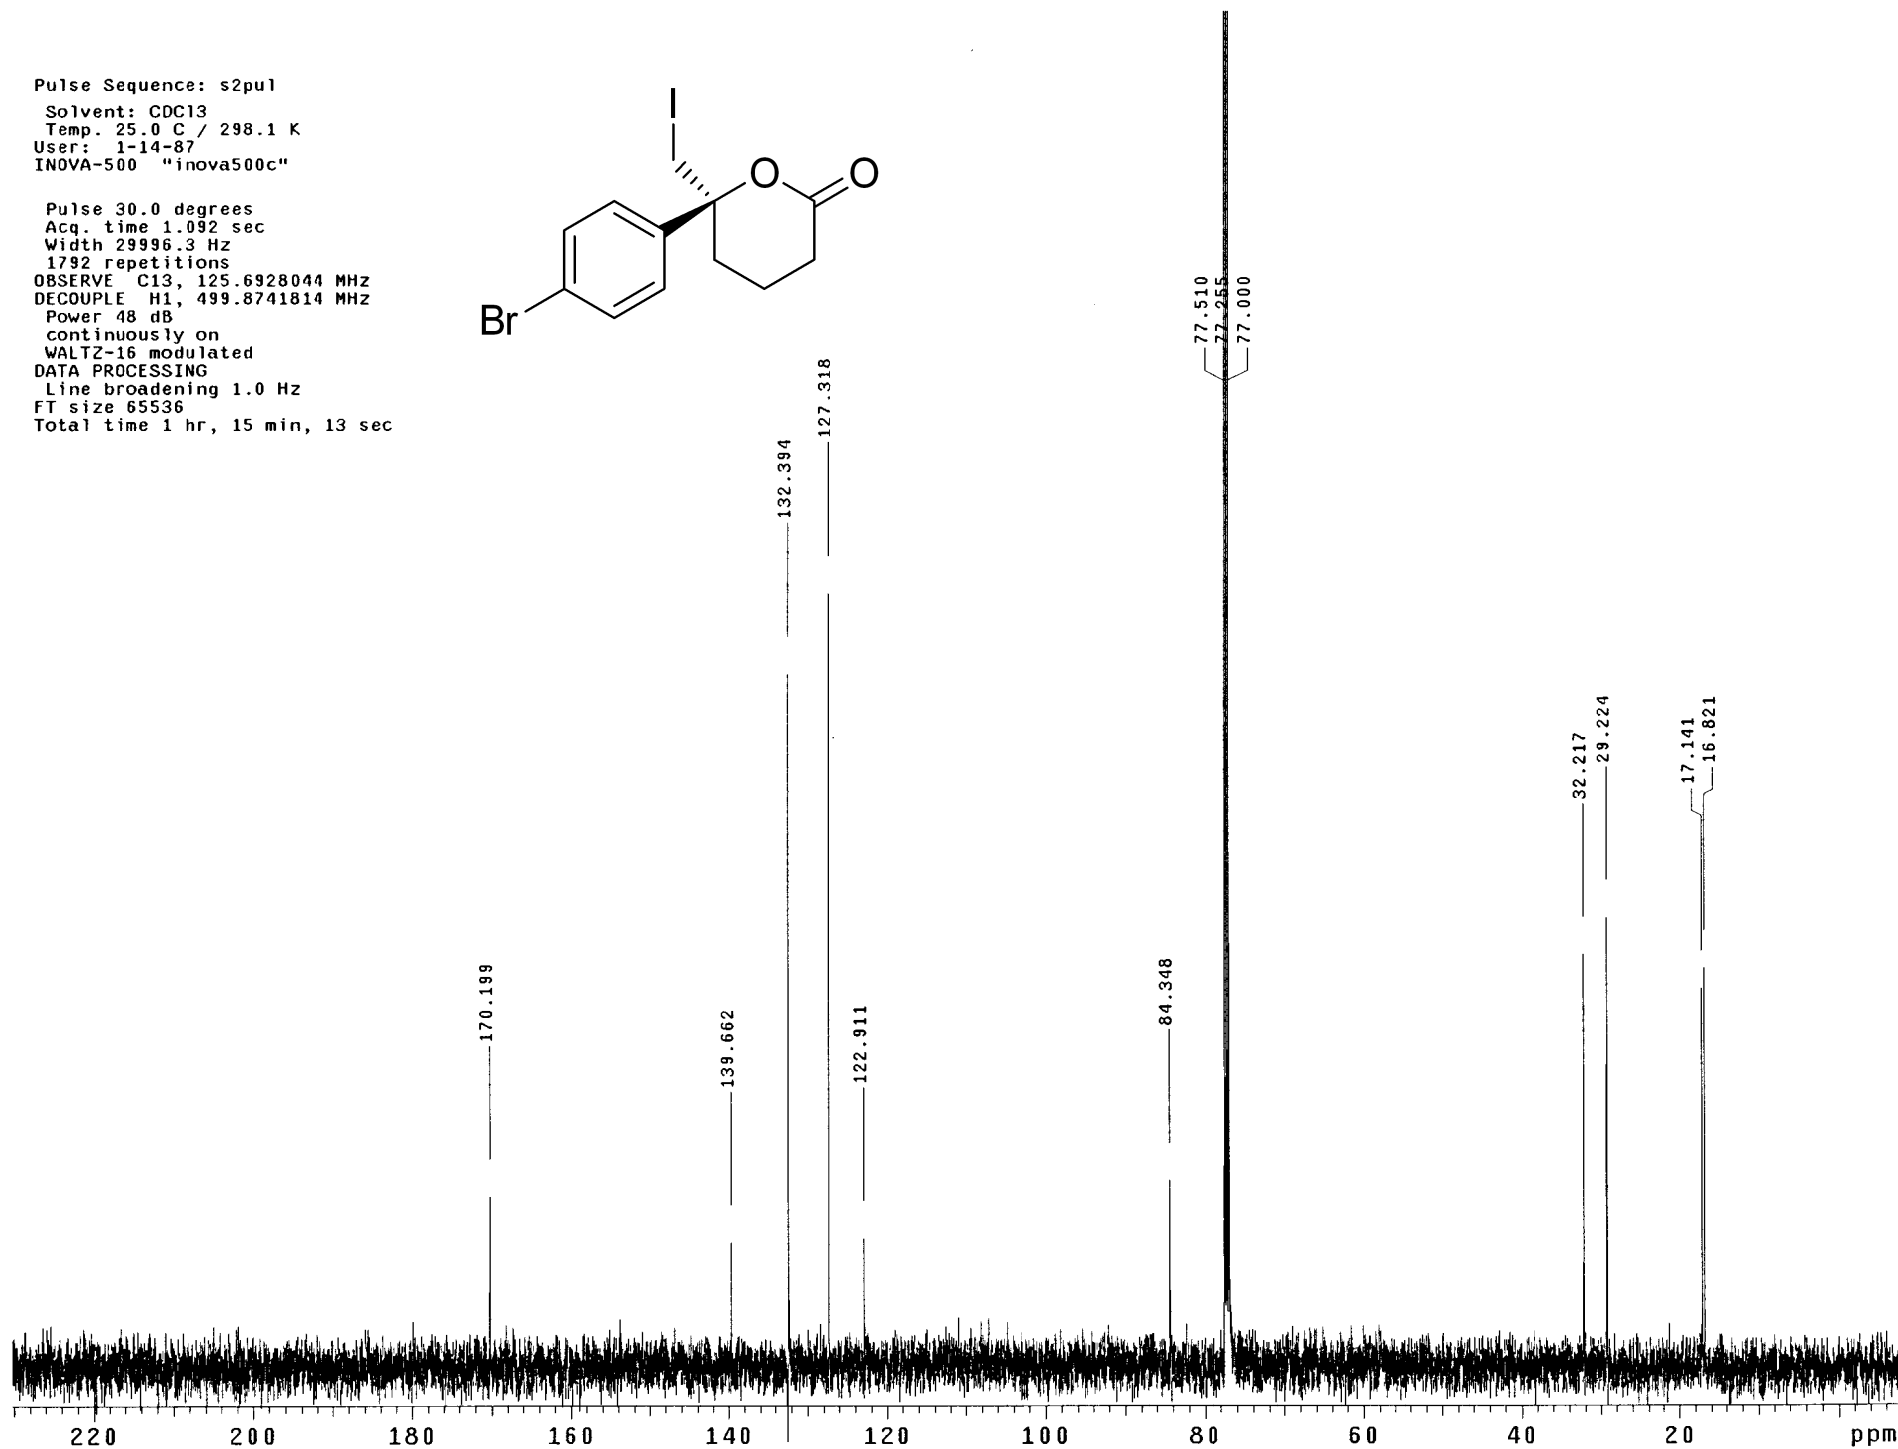

```

fluoro
exp 7.262
exp 7.262pul
SAMPLE
date Jun 23 2010 dfrq 500.176
solvent CDC13 dn H1
file exp dpwr 32
ACQUISITION dof 0
sfrq 500.176 dm nnn
tn H1 dmm c
at 2.048 dmf 8770
np 32768 dseq
sw 8000.0 dres 1.0
fb 4000 homo n
bs 8 temp 23.0
ss 2
tpwr 58 lb 0.10
pw 5.0 wtfile
d1 0 proc ft
tof 0 fn not used
nt 128 math f
ct 0
alock n werr
gain 20 wexp
FLAGS wbs
il n wnt
in n
dp y
hs nn
DISPLAY
sp 316.4
vp 3446.8
vs 439
sc 0
wc 250
hzmm 13.79
is 29855.69
rfi 1499.0
rfp 0
th 7
ins 2.000
nm

```

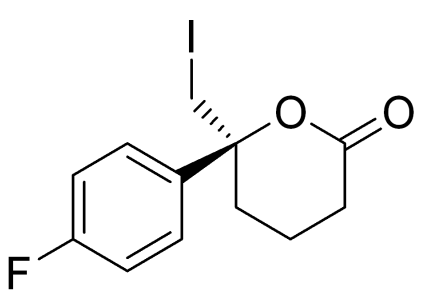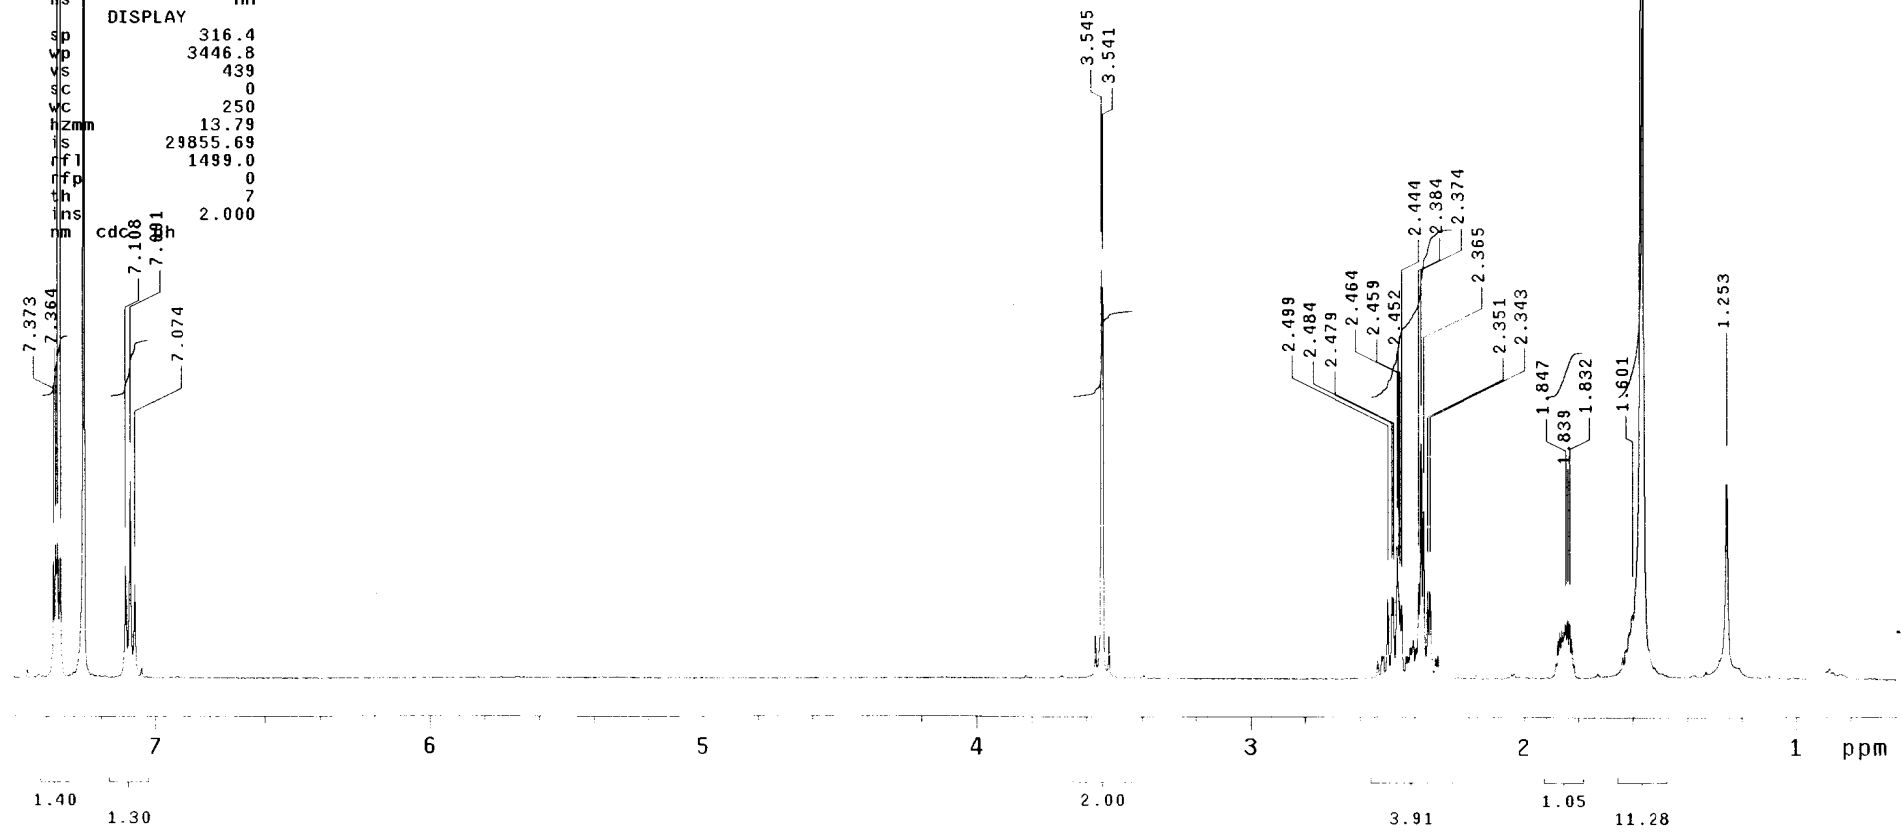

Pulse Sequence: s2pu1  
 Solvent: CDC13  
 Temp. 24.0 C / 297.1 K  
 User: 1-14-87  
 INOVA-500 "inova500c"

Pulse 30.0 degrees  
 Acq. time 1.092 sec  
 Width 29996.3 Hz  
 7744 repetitions  
 OBSERVE C13, 125.6928044 MHz  
 DECOUPLE H1, 499.8741814 MHz  
 Power 48 dB  
 continuously on  
 WALTZ-16 modulated  
 DATA PROCESSING  
 Line broadening 1.0 Hz  
 FT size 65536  
 Total time 3 hr, 45 min, 35 sec

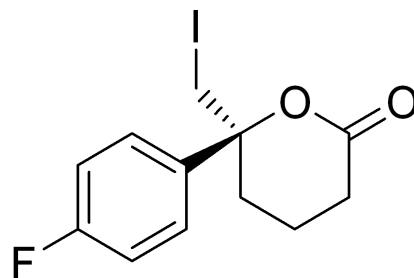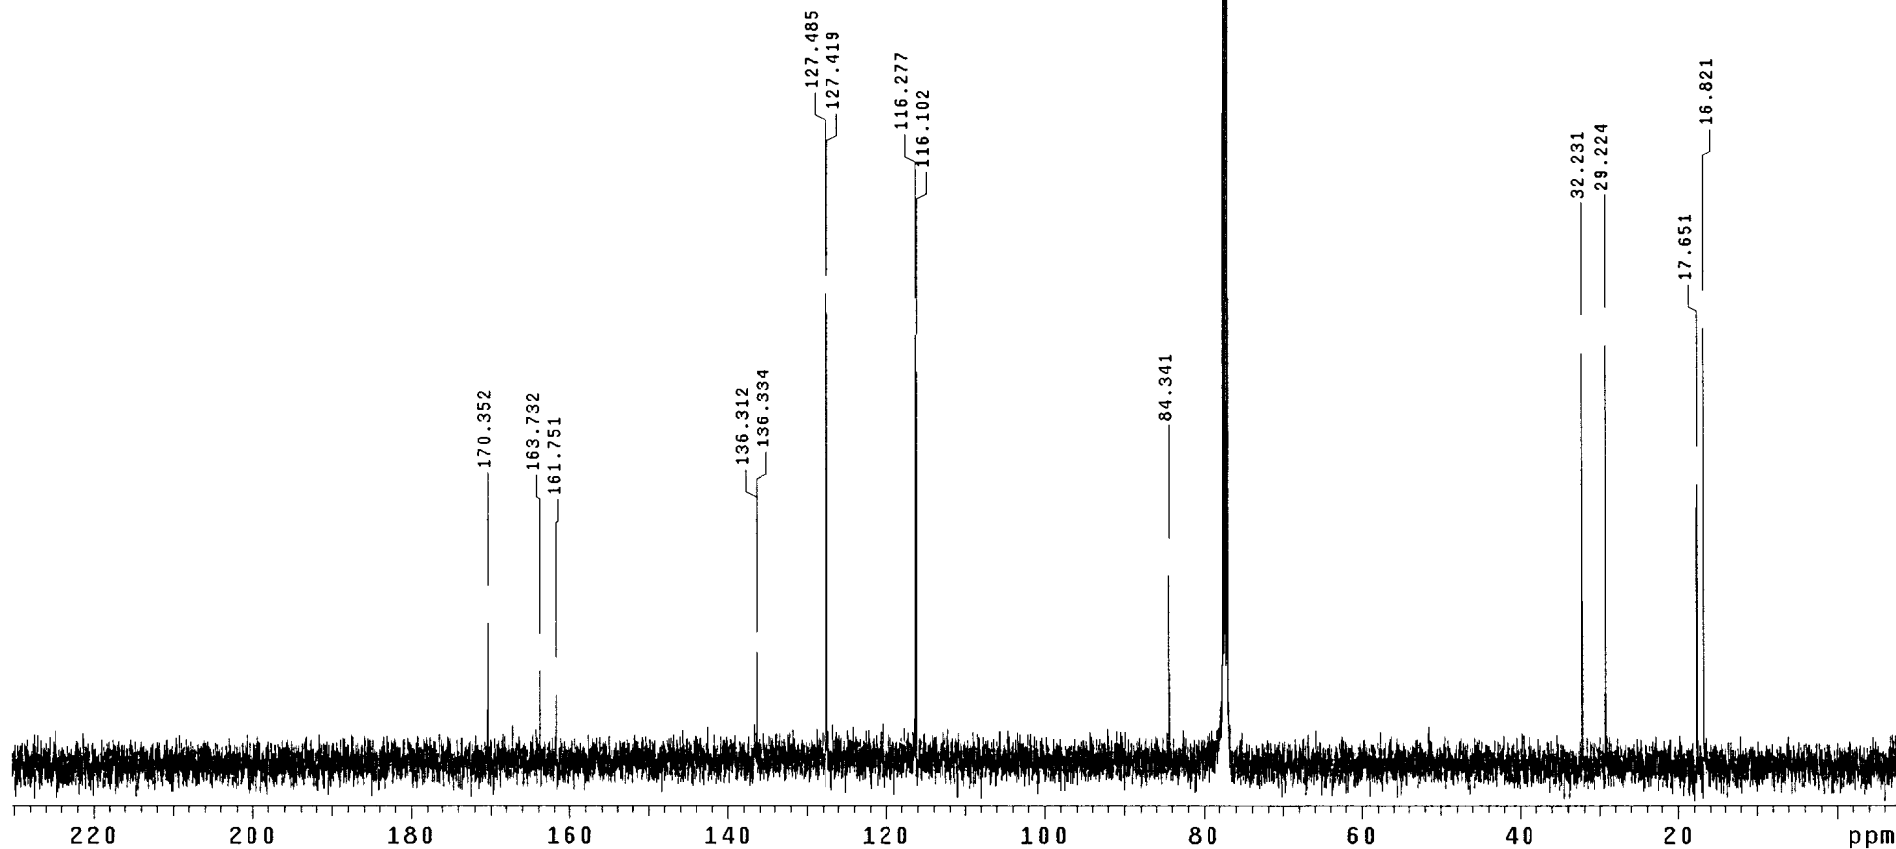



chloro

Pulse Sequence: s2pu1

Solvent: CDC13  
 Temp. 25.0 C / 298.1 K  
 INOVA-500 "inova500c"

Pulse 54.0 degrees  
 Acq. time 2.184 sec  
 Width 7501.2 Hz  
 32 repetitions  
 OBSERVE H1, 499.8716820 MHz  
 DATA PROCESSING  
 Line broadening 1.1 Hz  
 FT size 32768  
 Total time 1 min, 14 sec

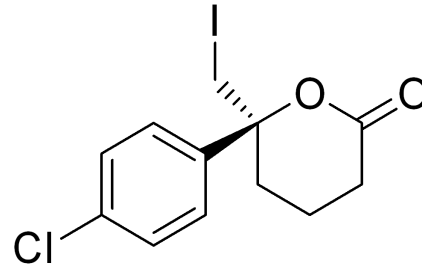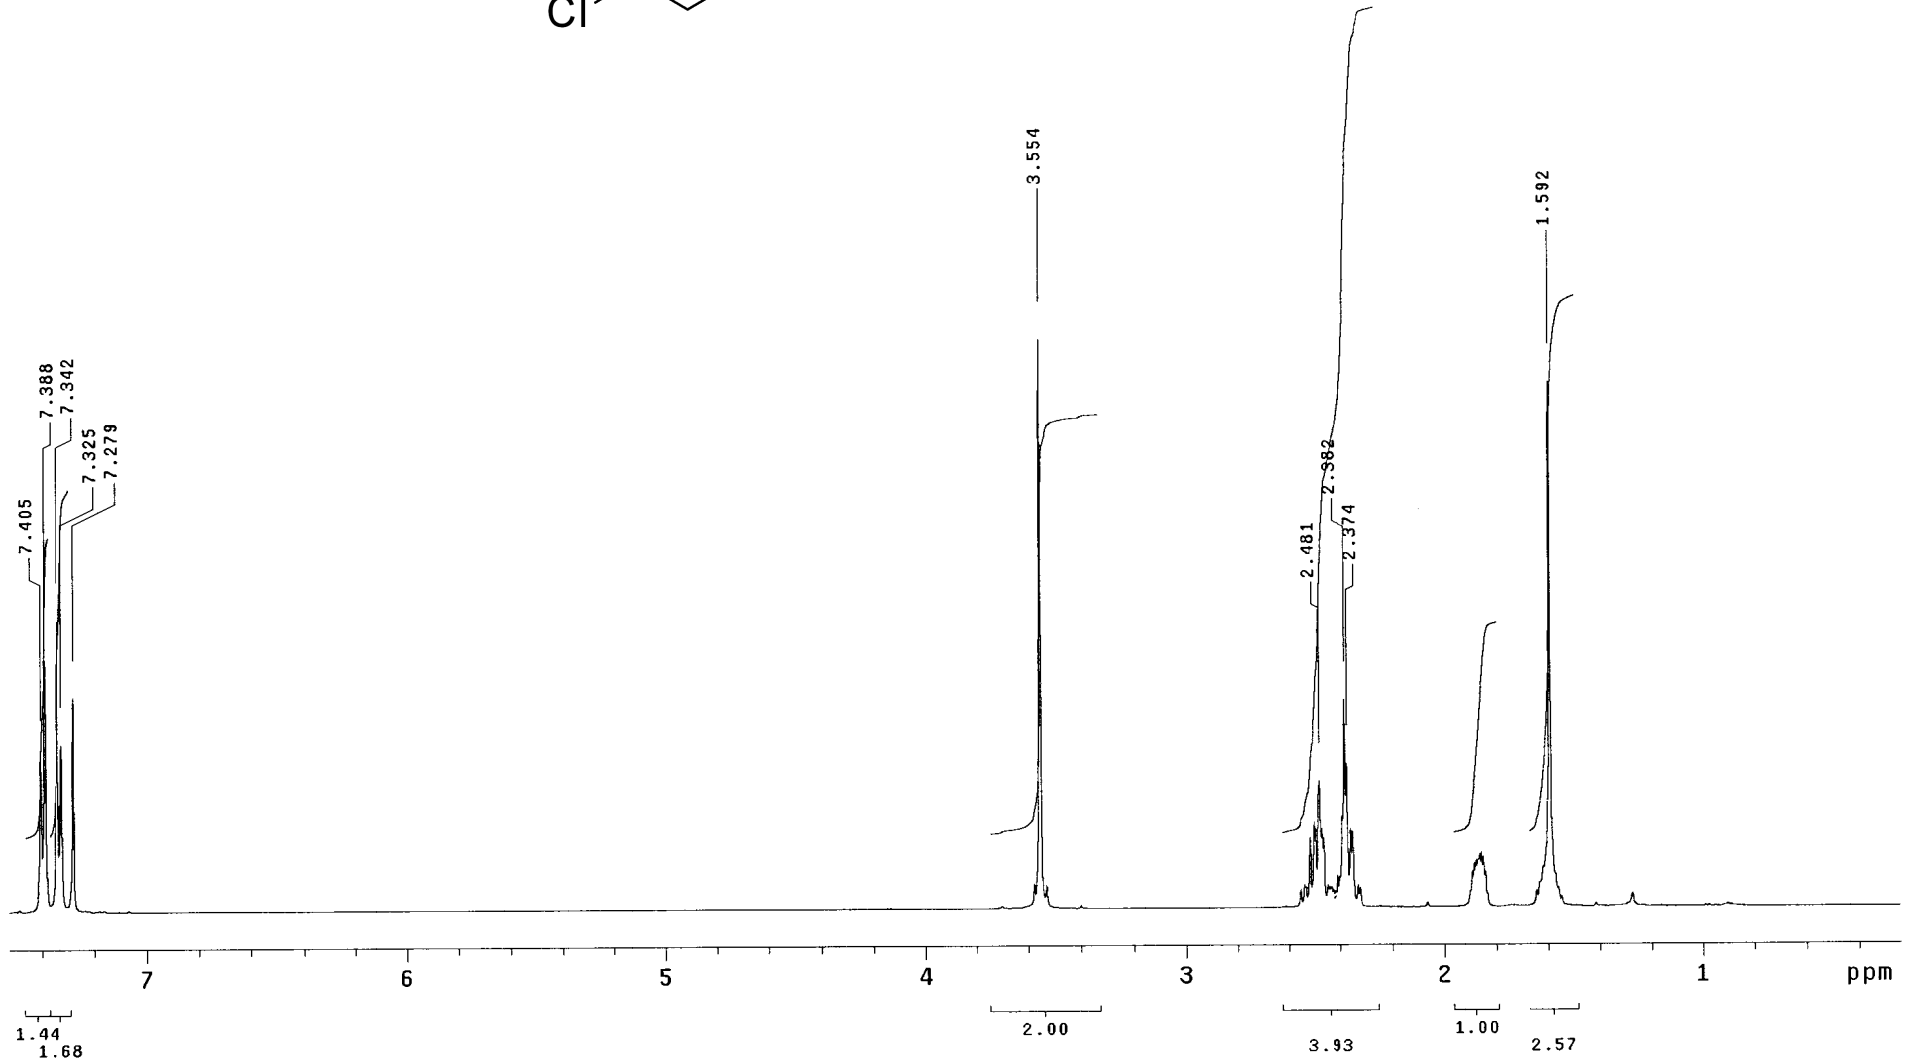

Filename: \_

STANDARD CARBON PARAMETERS

Pulse Sequence: s2pu1  
Solvent: CDC13  
Temp. 25.0 C / 298.1 K  
User: 1-14-87  
INOVA-500 "inova500c"

Pulse 30.0 degrees  
Acq. time 1.092 sec  
Width 29996.3 Hz  
640 repetitions  
OBSERVE C13, 125.6928044 MHZ  
DECOUPLE H1, 499.8741814 MHZ  
Power 48 dB  
continuously on  
WALTZ-16 modulated  
DATA PROCESSING  
Line broadening 1.0 Hz  
FT size 65536  
Total time 1 hr, 15 min, 13 sec

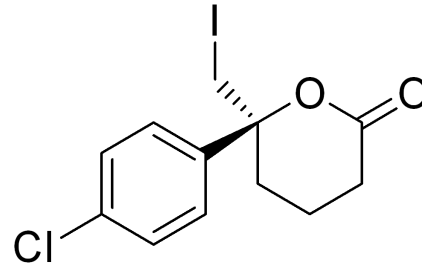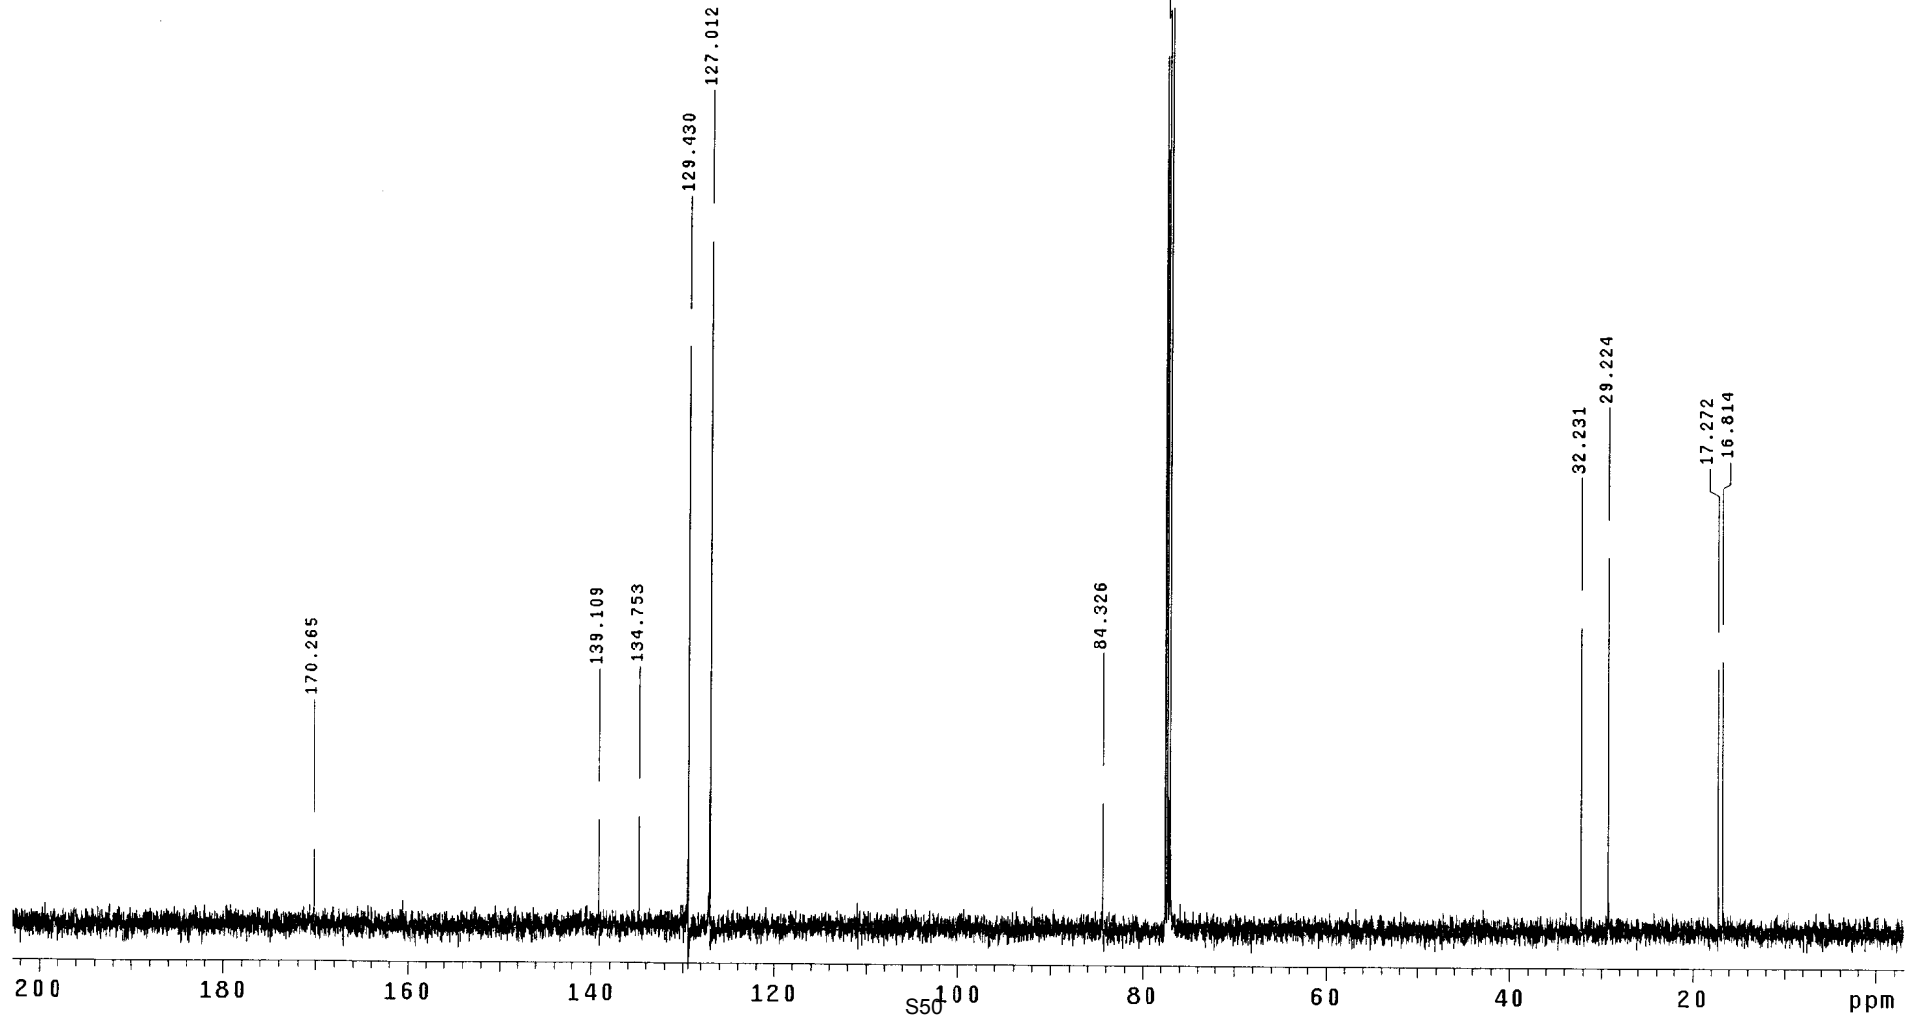

phenyl5ring  
Pulse Sequence: s2pu1  
Solvent: CDC13  
Temp. 25.0 C / 298.1 K  
INOVA-500 "inova500c"

Pulse 54.0 degrees  
Acq. time 2.184 sec  
Width 7501.2 Hz  
32 repetitions  
OBSERVE H1, 499.8716820 MHz  
DATA PROCESSING  
Spectral broadening 1.1 Hz  
F1 size 32768  
Total time 1 min, 14 sec

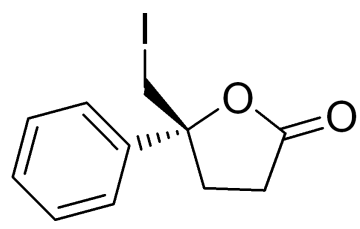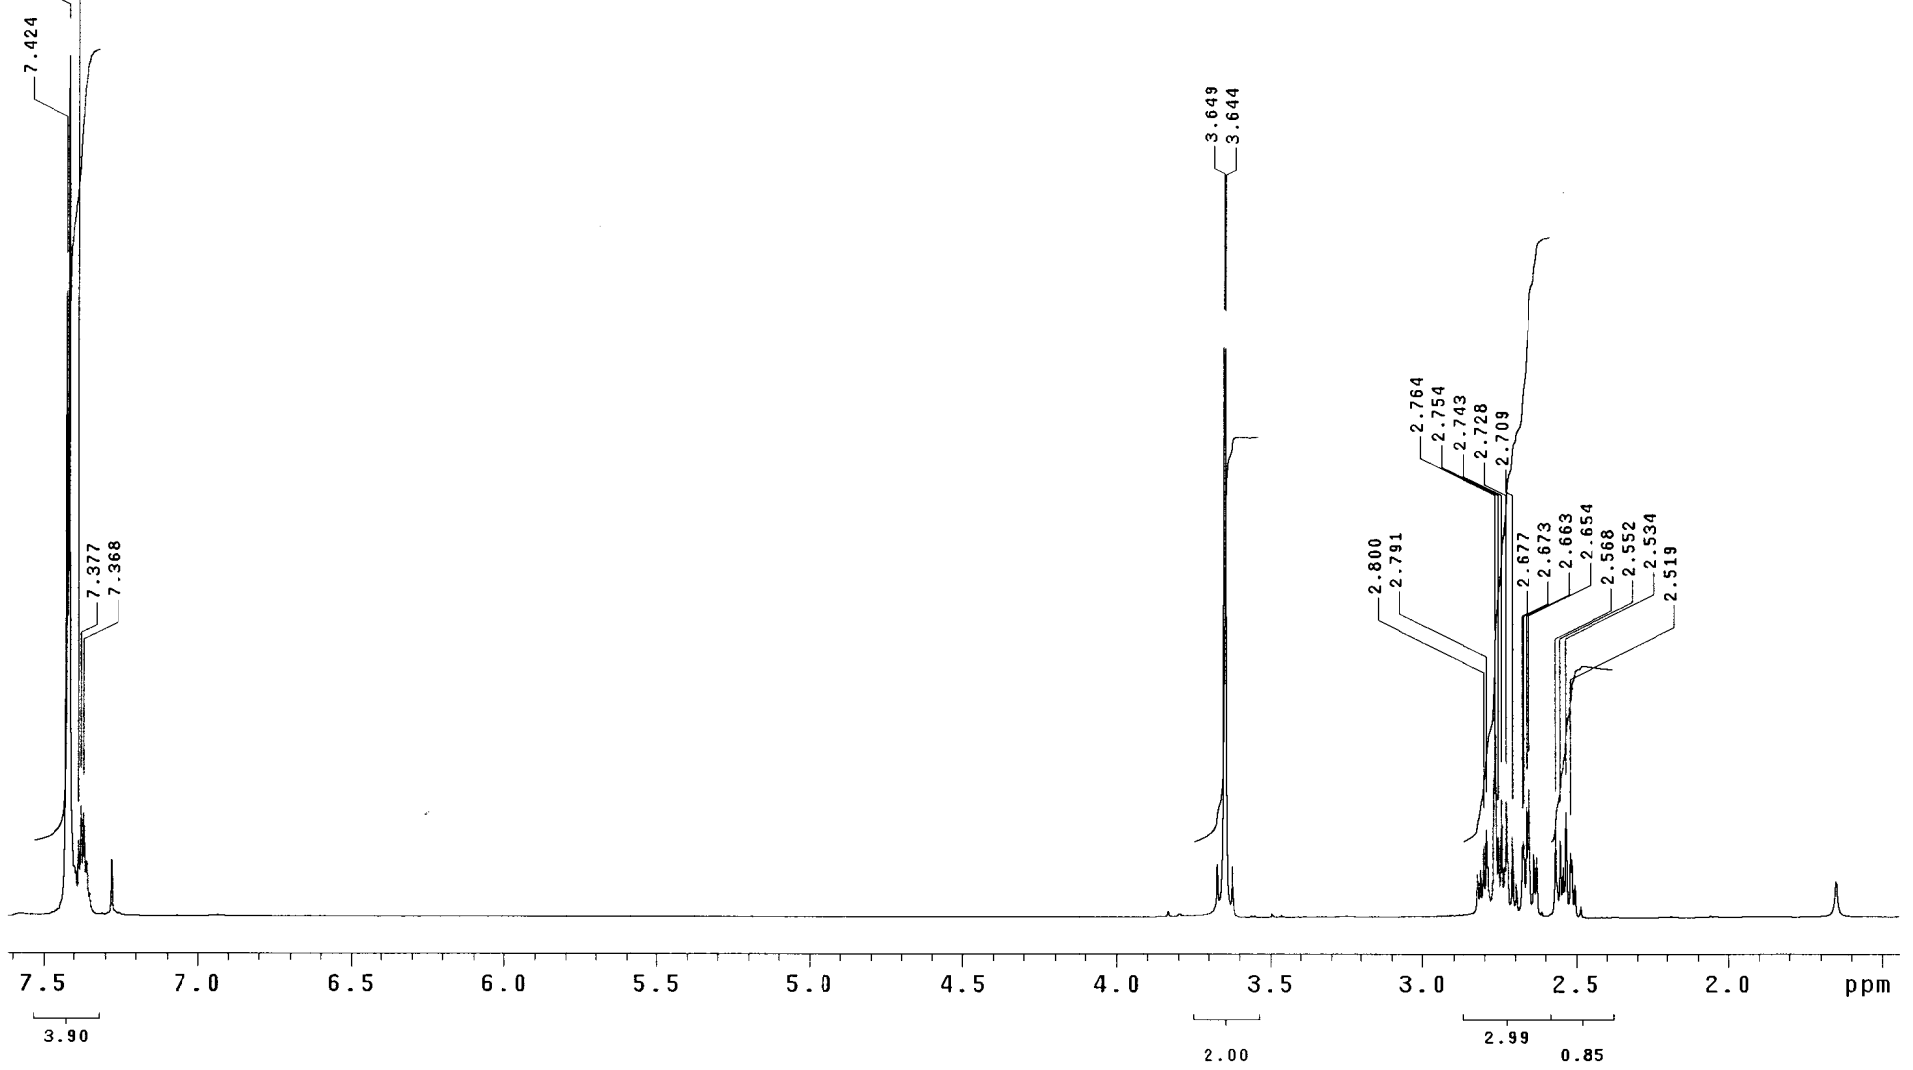

pheny;15ring

Pulse Sequence: s2pul

Solvent: CDCl3  
 Temp. 25.0 C / 298.1 K  
 User: 1-14-87  
 INOVA-500 "inova500c"

Pulse 30.0 degrees  
 Acq. time 1.092 sec  
 Width 29996.3 Hz  
 160 repetitions  
 OBSERVE C13, 125.6928044 MHz  
 DECOUPLE H1, 499.8741814 MHz  
 Power 48 dB  
 continuously on  
 WALTZ-16 modulated  
 DATA PROCESSING  
 Line broadening 1.0 Hz  
 FT size 65536  
 Total time 1 hr, 15 min, 15 sec

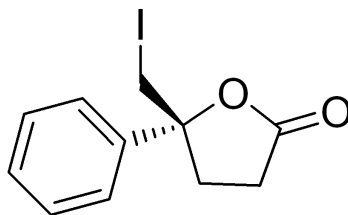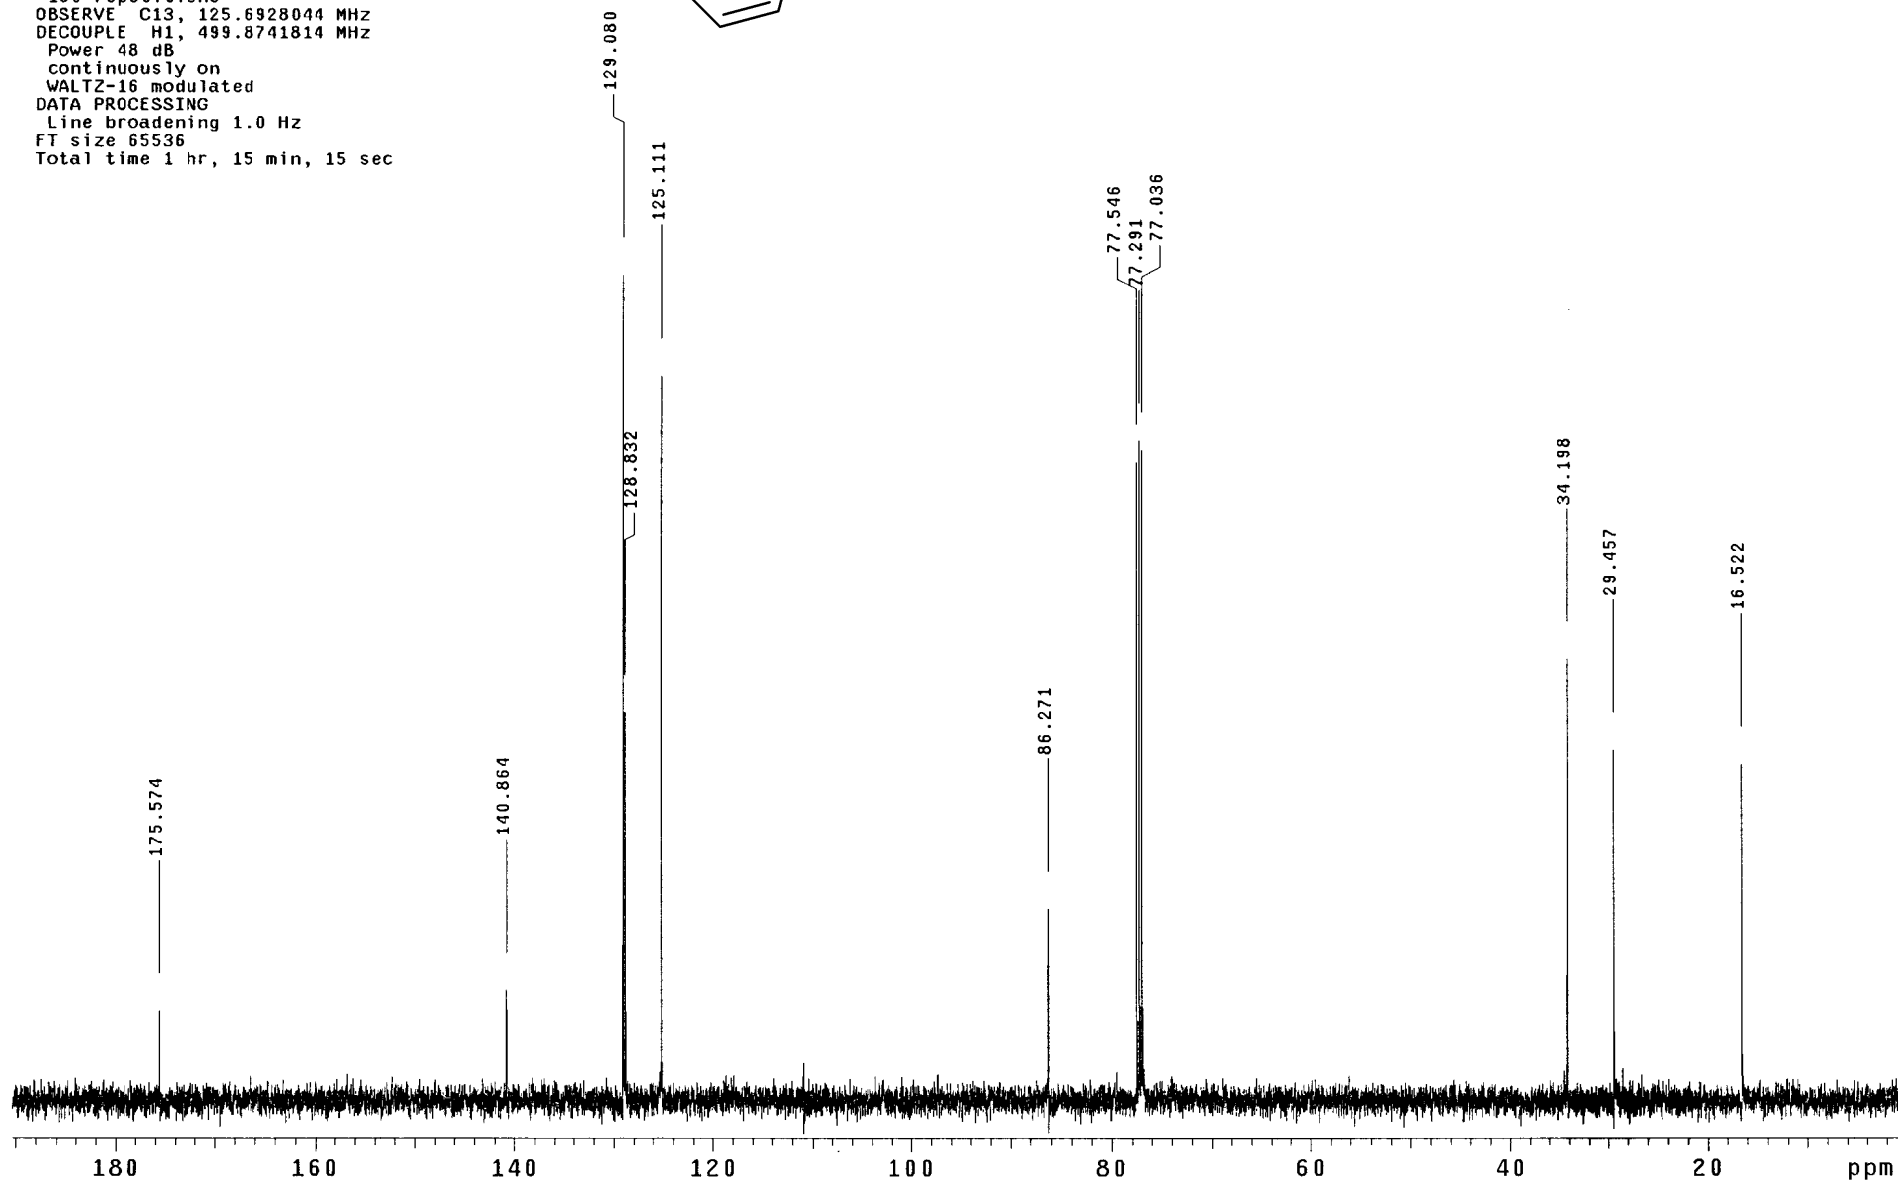

Racemic 3a

==== Shimadzu LCsolution Analysis Report ====

C:\LabSolutions\Data\Data\gev\Gev345rac6ringadh.lcd

Acquired by : Admin  
 Sample Name : run  
 Sample ID :  
 Data File Name : Gev345rac6ringadh.lcd  
 Method File Name : Col2\_60min\_02%C\_1ml\_min.lcm  
 Batch File Name : Gev345rac6ringo.lcb  
 Data Acquired : 3/14/2010 7:11:22 PM

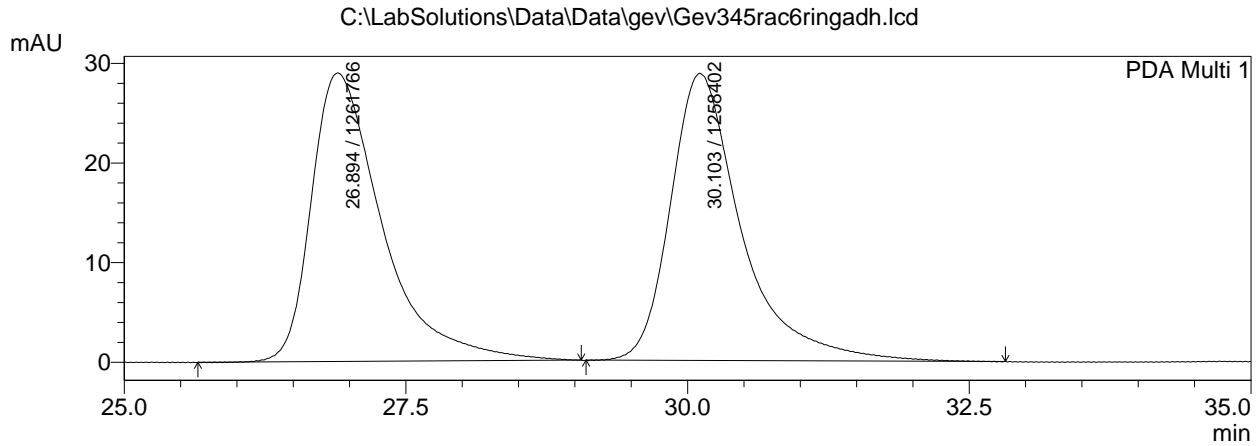

PeakTable

PDA Ch1 254nm 4nm

| Peak# | Ret. Time | Area    | Height | Area %  | Height % |
|-------|-----------|---------|--------|---------|----------|
| 1     | 26.894    | 1261766 | 28995  | 50.067  | 50.144   |
| 2     | 30.103    | 1258402 | 28829  | 49.933  | 49.856   |
| Total |           | 2520168 | 57823  | 100.000 | 100.000  |

PeakTable

PDA Ch2

Enantioenriched 3a

## ==== Shimadzu LCsolution Analysis Report ====

C:\LabSolutions\Data\Data\gev\Gev397-1R.lcd

Acquired by : Admin  
 Sample Name : run  
 Sample ID :  
 Data File Name : Gev397-1R.lcd  
 Method File Name : Col2\_60min\_02%C\_1ml\_min.lcm  
 Batch File Name : gev397and398.lcb  
 Data Acquired : 5/26/2010 1:20:01 PM

C:\LabSolutions\Data\Data\gev\Gev397-1R.lcd

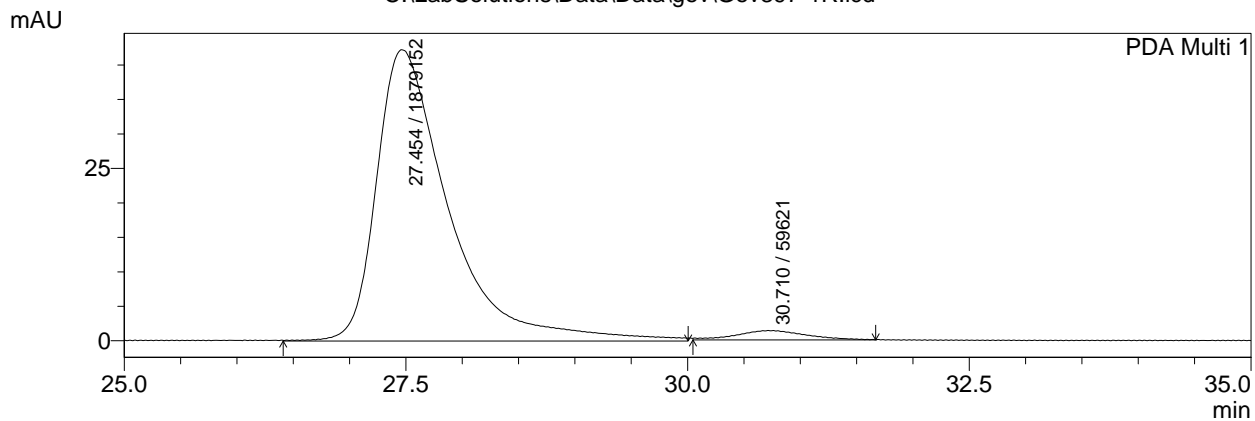

1 PDA Multi 1/254nm 4nm

PeakTable

PDA Ch1 254nm 4nm

| Peak# | Ret. Time | Area    | Height | Area %  | Height % |
|-------|-----------|---------|--------|---------|----------|
| 1     | 27.454    | 1879152 | 42279  | 96.925  | 96.869   |
| 2     | 30.710    | 59621   | 1367   | 3.075   | 3.131    |
| Total |           | 1938774 | 43646  | 100.000 | 100.000  |

PeakTable

PDA Ch2

Racemic 3b

## ==== Shimadzu LCsolution Analysis Report ====

C:\LabSolutions\Data\Data\gev\Gev376-2.lcd

Acquired by : Admin  
 Sample Name : run  
 Sample ID :  
 Data File Name : Gev376-2.lcd  
 Method File Name : Col2\_60min\_02%C\_1ml\_min.lcm  
 Batch File Name : Gev376.lcb  
 Data Acquired : 4/27/2010 4:48:50 PM

C:\LabSolutions\Data\Data\gev\Gev376-2.lcd

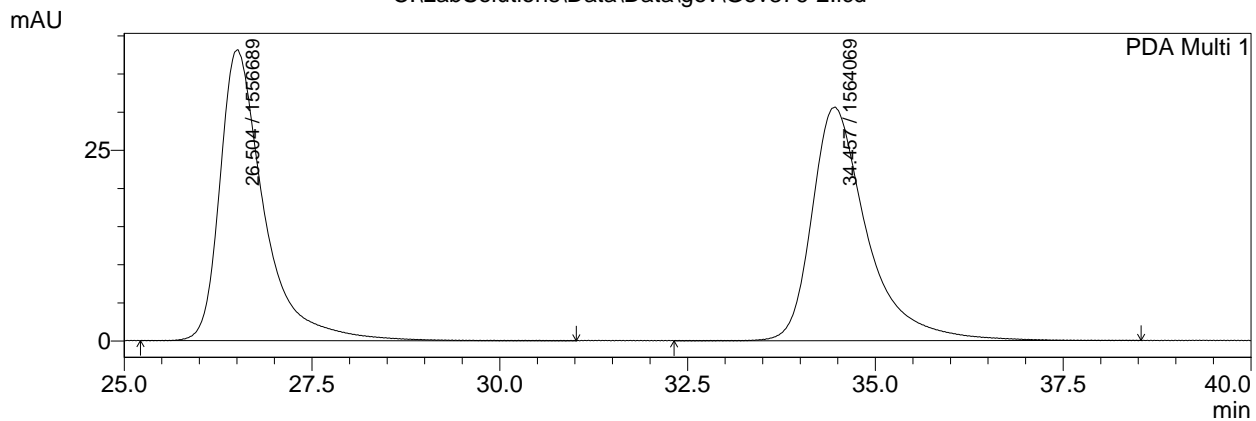

1 PDA Multi 1/254nm 4nm

PeakTable

PDA Ch1 254nm 4nm

| Peak# | Ret. Time | Area    | Height | Area %  | Height % |
|-------|-----------|---------|--------|---------|----------|
| 1     | 26.504    | 1556689 | 38123  | 49.882  | 55.442   |
| 2     | 34.457    | 1564069 | 30639  | 50.118  | 44.558   |
| Total |           | 3120757 | 68762  | 100.000 | 100.000  |

PeakTable

PDA Ch2

Enantioenriched 3b

## ==== Shimadzu LCsolution Analysis Report ====

C:\LabSolutions\Data\Data\gev\Gev398-2.lcd

Acquired by : Admin  
 Sample Name : run  
 Sample ID :  
 Data File Name : Gev398-2.lcd  
 Method File Name : Col2\_60min\_02%C\_1ml\_min.lcm  
 Batch File Name : gev397and398.lcb  
 Data Acquired : 5/26/2010 11:15:51 AM

C:\LabSolutions\Data\Data\gev\Gev398-2.lcd

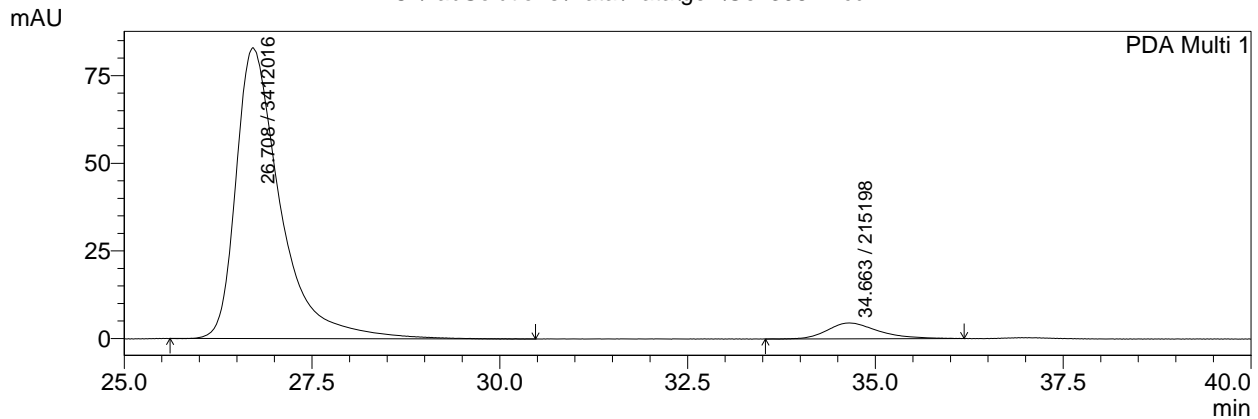

1 PDA Multi 1/254nm 4nm

PeakTable

PDA Ch1 254nm 4nm

| Peak# | Ret. Time | Area    | Height | Area %  | Height % |
|-------|-----------|---------|--------|---------|----------|
| 1     | 26.708    | 3412016 | 83011  | 94.067  | 94.799   |
| 2     | 34.663    | 215198  | 4554   | 5.933   | 5.201    |
| Total |           | 3627214 | 87565  | 100.000 | 100.000  |

PeakTable

PDA Ch2



Racemic 3c

## ==== Shimadzu LCsolution Analysis Report ====

C:\LabSolutions\Data\Data\gev\Gev388-2odh.lcd

Acquired by : Admin  
 Sample Name : run  
 Sample ID :  
 Data File Name : Gev388-2odh.lcd  
 Method File Name : Col3\_60min\_10%C\_1ml\_min.lcm  
 Batch File Name : Gev388odh.lcb  
 Data Acquired : 5/9/2010 11:06:20 PM

C:\LabSolutions\Data\Data\gev\Gev388-2odh.lcd

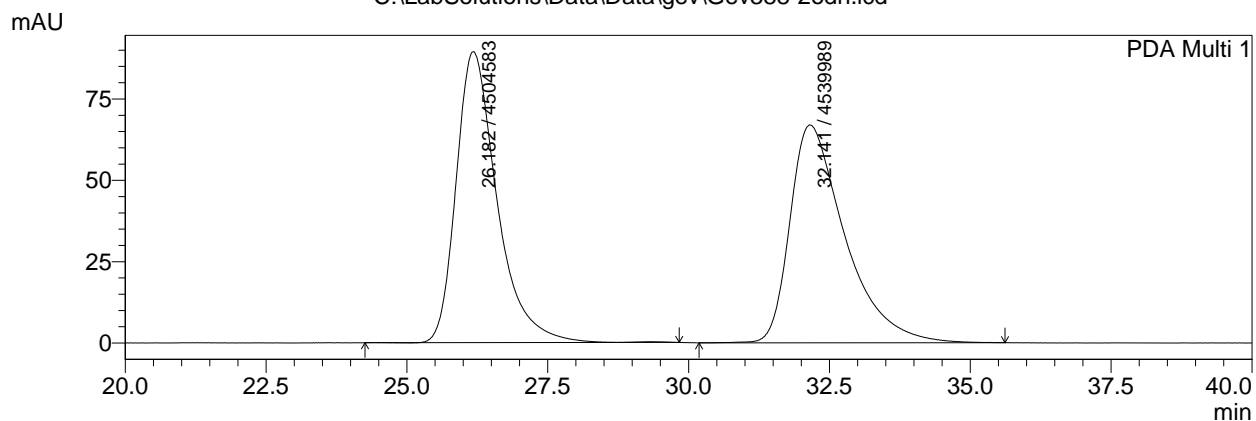

1 PDA Multi 1/254nm 4nm

PeakTable

PDA Ch1 254nm 4nm

| Peak# | Ret. Time | Area    | Height | Area %  | Height % |
|-------|-----------|---------|--------|---------|----------|
| 1     | 26.182    | 4504583 | 89417  | 49.804  | 57.167   |
| 2     | 32.141    | 4539989 | 66997  | 50.196  | 42.833   |
| Total |           | 9044572 | 156414 | 100.000 | 100.000  |

PeakTable

PDA Ch2

Enantioenriched 3c

## ==== Shimadzu LCsolution Analysis Report ====

C:\LabSolutions\Data\Data\gev\Gev404-1odh.lcd

Acquired by : Admin  
 Sample Name : run  
 Sample ID :  
 Data File Name : Gev404-1odh.lcd  
 Method File Name : Col3\_60min\_10%C\_1ml\_min.lcm  
 Batch File Name : Gev404-1odh.lcb  
 Data Acquired : 6/2/2010 12:20:16 PM

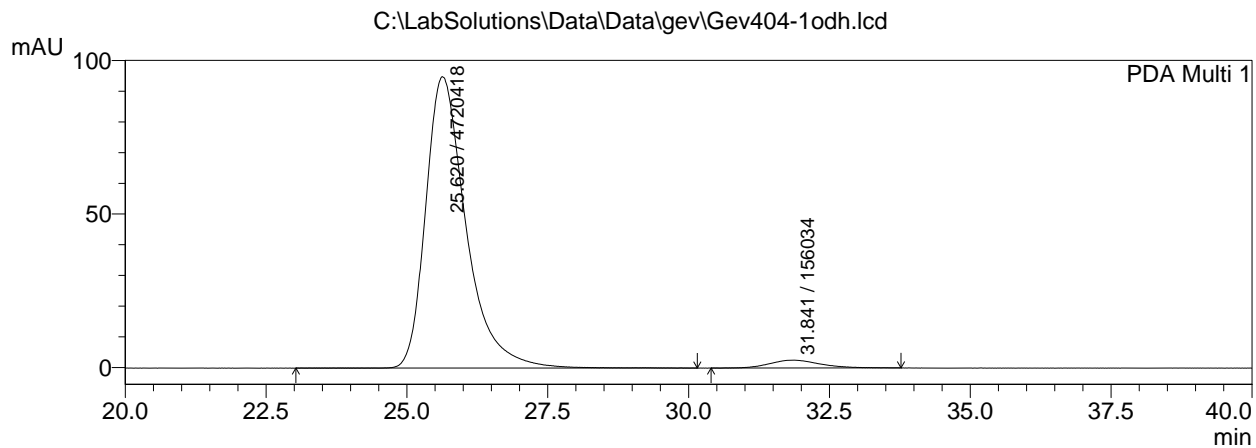

PeakTable

PDA Ch1 254nm 4nm

| Peak# | Ret. Time | Area    | Height | Area %  | Height % |
|-------|-----------|---------|--------|---------|----------|
| 1     | 25.620    | 4720418 | 94946  | 96.800  | 97.375   |
| 2     | 31.841    | 156034  | 2559   | 3.200   | 2.625    |
| Total |           | 4876452 | 97505  | 100.000 | 100.000  |

PeakTable

PDA Ch2

Racemic 3d

## ==== Shimadzu LCsolution Analysis Report ====

C:\LabSolutions\Data\Data\gev\Gev388-3adh.lcd

Acquired by : Admin  
 Sample Name : run  
 Sample ID :  
 Data File Name : Gev388-3adh.lcd  
 Method File Name : Col2\_60min\_02%C\_1ml\_min.lcm  
 Batch File Name : Gev388adh.lcb  
 Data Acquired : 5/9/2010 8:01:43 PM

C:\LabSolutions\Data\Data\gev\Gev388-3adh.lcd

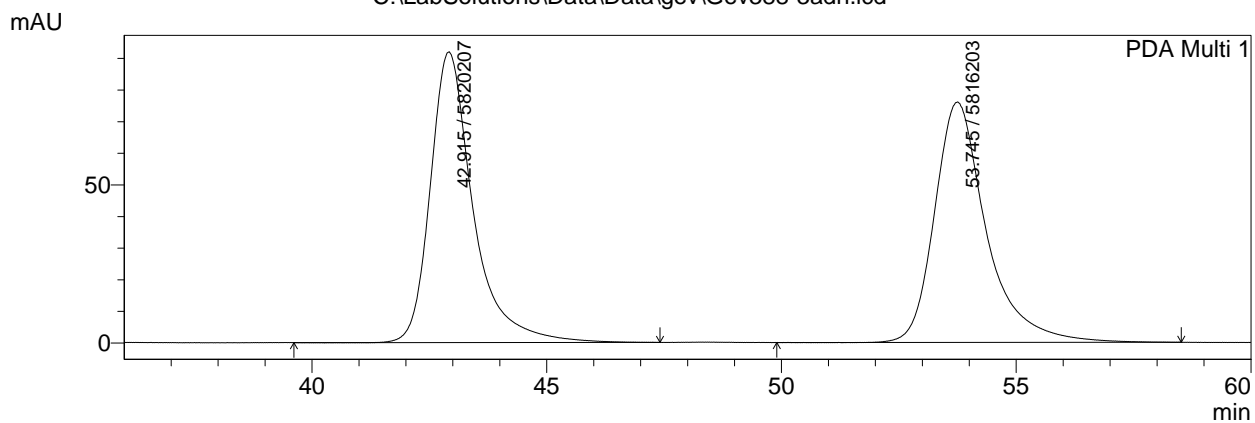

1 PDA Multi 1/254nm 4nm

PeakTable

PDA Ch1 254nm 4nm

| Peak# | Ret. Time | Area     | Height | Area %  | Height % |
|-------|-----------|----------|--------|---------|----------|
| 1     | 42.915    | 5820207  | 92013  | 50.017  | 54.743   |
| 2     | 53.745    | 5816203  | 76070  | 49.983  | 45.257   |
| Total |           | 11636410 | 168084 | 100.000 | 100.000  |

PeakTable

PDA Ch2

Enantioenriched 3d

## ==== Shimadzu LCsolution Analysis Report ====

C:\LabSolutions\Data\Data\gev\Gev400-2.lcd

Acquired by : Admin  
 Sample Name : run  
 Sample ID :  
 Data File Name : Gev400-2.lcd  
 Method File Name : Col2\_60min\_02%C\_1ml\_min.lcm  
 Batch File Name : Gev400.lcb  
 Data Acquired : 6/1/2010 3:12:33 PM

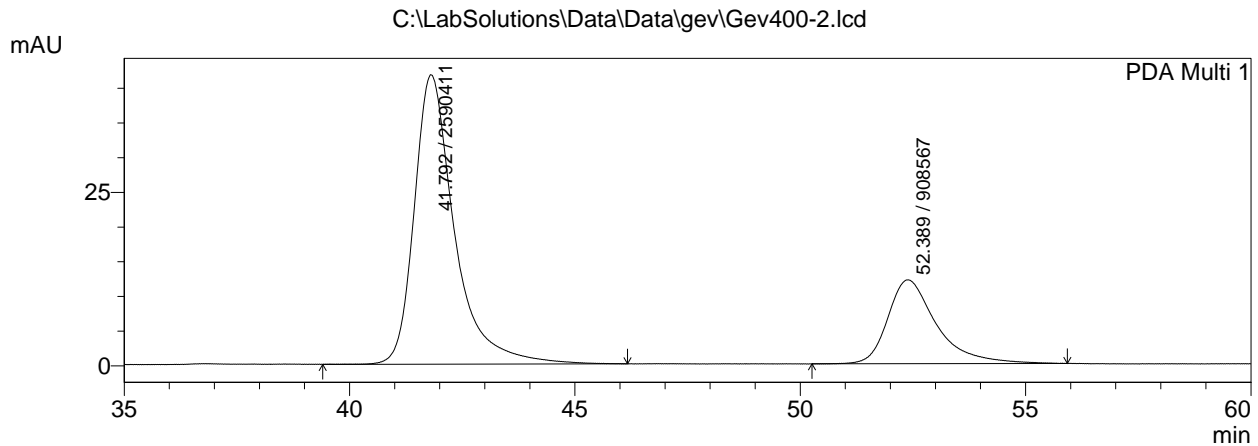

1 PDA Multi 1/254nm 4nm

PeakTable

PDA Ch1 254nm 4nm

| Peak# | Ret. Time | Area    | Height | Area %  | Height % |
|-------|-----------|---------|--------|---------|----------|
| 1     | 41.792    | 2590411 | 41736  | 74.033  | 77.528   |
| 2     | 52.389    | 908567  | 12097  | 25.967  | 22.472   |
| Total |           | 3498979 | 53834  | 100.000 | 100.000  |

PeakTable

PDA Ch2

```

=====
Acq. Operator   : gev                               Seq. Line :    2
Acq. Instrument : Instrument 2                       Location  : Vial 1
Injection Date  : 5/15/2010 7:11:07 PM             Inj       :    1
                                                    Inj Volume: 1 µl

Acq. Method     : C:\CHEM32\2\METHODS\GEV-DUAL150ISO120_7PSI.M
Last changed    : 5/15/2010 6:34:38 PM by ARB
Analysis Method : C:\CHEM32\2\METHODS\ARB-DUAL040ISO_7PSI.M
Last changed    : 6/5/2010 3:34:25 PM by CU
                  (modified after loading)

Method Info     : standard FID test at install DUAL INJECTION
=====

```

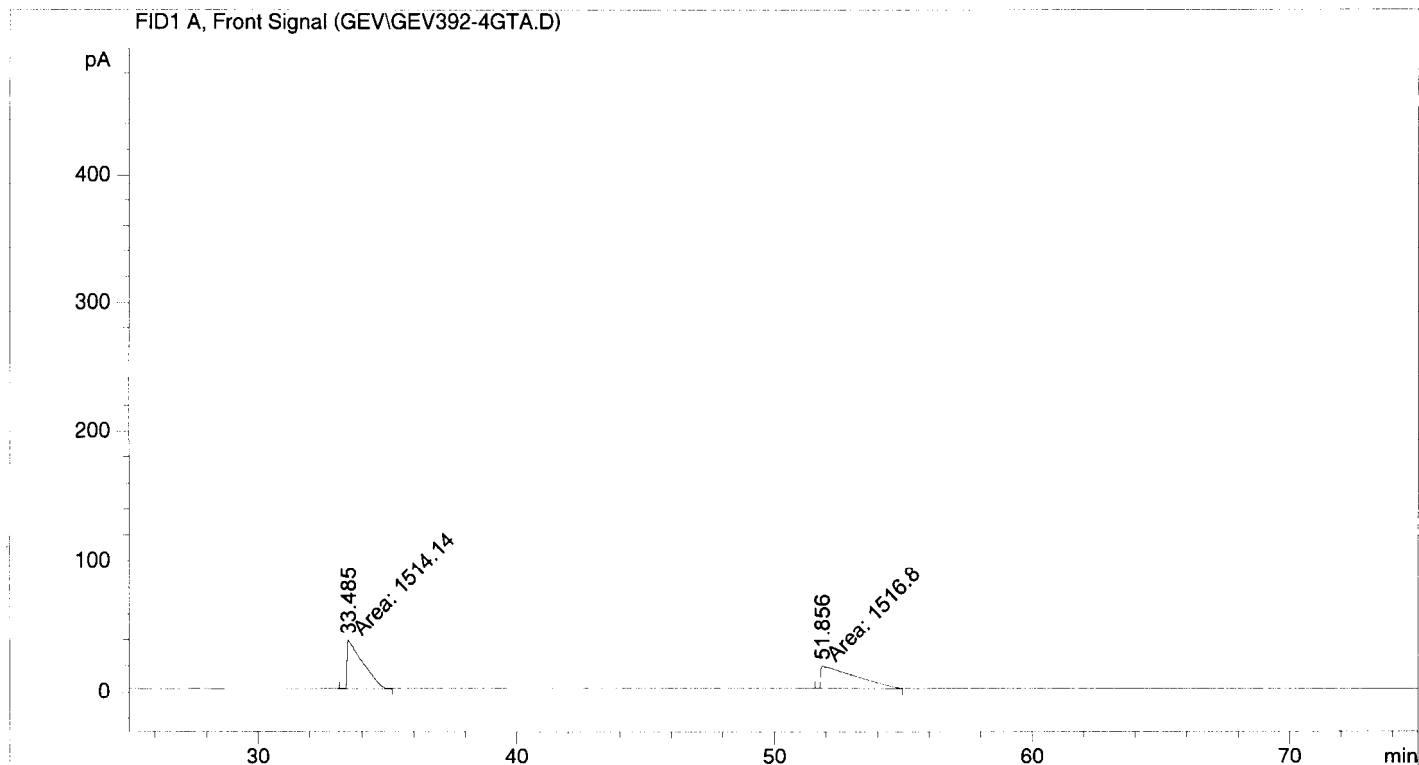

```

=====
                          Area Percent Report
=====

```

```

Sorted By           :      Signal
Multiplier:         :      1.0000
Dilution:           :      1.0000
Use Multiplier & Dilution Factor with ISTDs

```

Signal 1: FID1 A, Front Signal

| Peak # | RetTime [min] | Type | Width [min] | Area [pA*s] | Height [pA] | Area %   |
|--------|---------------|------|-------------|-------------|-------------|----------|
| 1      | 33.485        | MM   | 0.6808      | 1514.13623  | 37.06898    | 49.95603 |
| 2      | 51.856        | MM   | 1.5141      | 1516.80176  | 16.69694    | 50.04397 |

```
Totals :                      3030.93799    53.76592
```

Sample Name: Gev401-2

```

=====
Acq. Operator   : GEV                      Seq. Line :    2
Acq. Instrument : Instrument 2              Location  : Vial 10
Injection Date  : 6/2/2010 3:01:00 PM      Inj       :    1
                                           Inj Volume: 1 µl

Acq. Method     : C:\CHEM32\2\METHODS\GEV-DUAL150ISO120_7PSI.M
Last changed    : 5/15/2010 6:34:38 PM by ARB
Analysis Method : C:\CHEM32\2\METHODS\ARB-DUAL040ISO_7PSI.M
Last changed    : 6/5/2010 3:33:46 PM by CU
                 (modified after loading)

Method Info     : standard FID test at install DUAL INJECTION
    
```

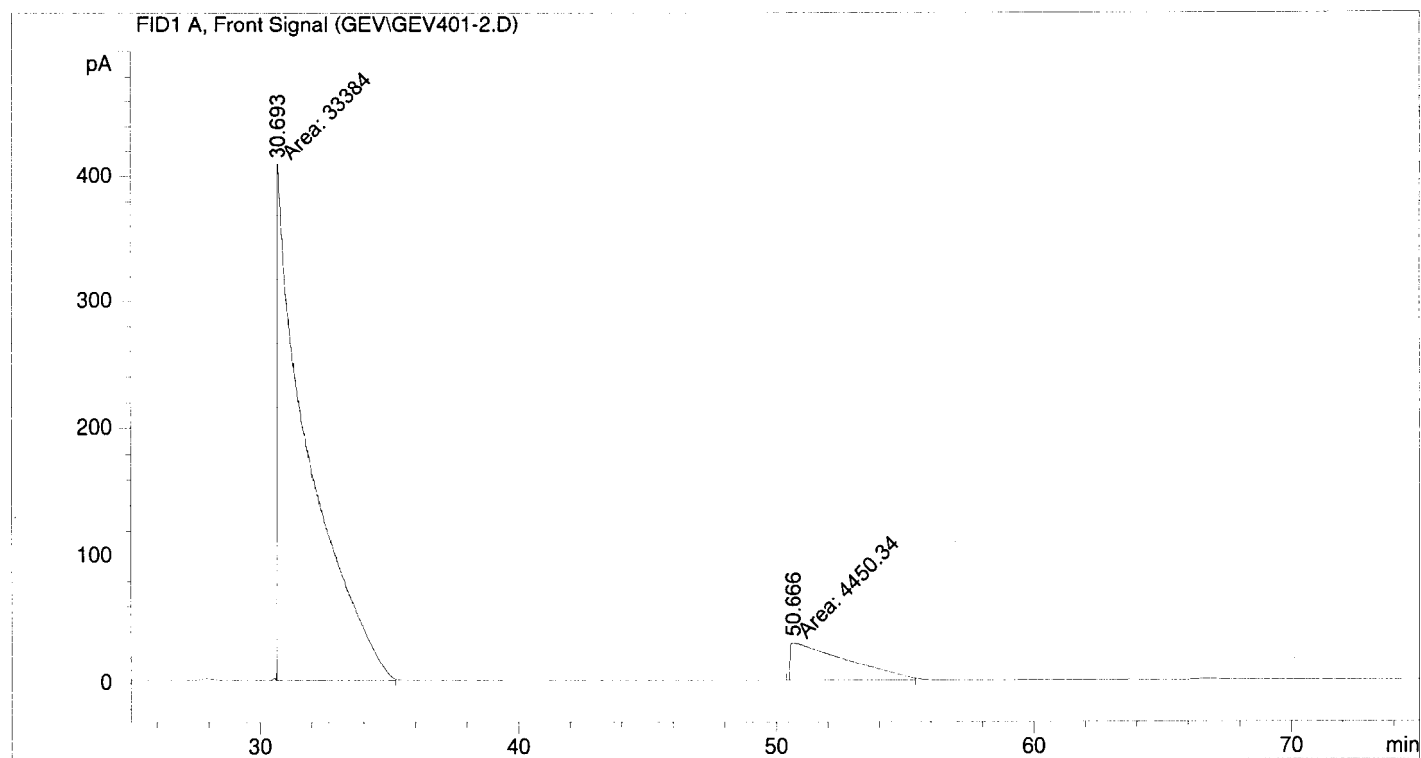

Area Percent Report

```

Sorted By      :      Signal
Multiplier:    :      1.0000
Dilution:      :      1.0000
Use Multiplier & Dilution Factor with ISTDs
    
```

Signal 1: FID1 A, Front Signal

| Peak # | RetTime [min] | Type | Width [min] | Area [pA*s] | Height [pA] | Area %   |
|--------|---------------|------|-------------|-------------|-------------|----------|
| 1      | 30.693        | MM   | 1.3638      | 3.33840e4   | 407.97794   | 88.23732 |
| 2      | 50.666        | MM   | 2.5022      | 4450.33691  | 29.64328    | 11.76268 |

Totals : 3.78344e4 437.62121

Racemic 3f

## ==== Shimadzu LCsolution Analysis Report ====

C:\LabSolutions\Data\Data\gev\Gev376-3.lcd

Acquired by : Admin  
 Sample Name : run  
 Sample ID :  
 Data File Name : Gev376-3.lcd  
 Method File Name : Col2\_60min\_02%C\_1ml\_min.lcm  
 Batch File Name : Gev376.lcb  
 Data Acquired : 4/27/2010 5:51:14 PM

C:\LabSolutions\Data\Data\gev\Gev376-3.lcd

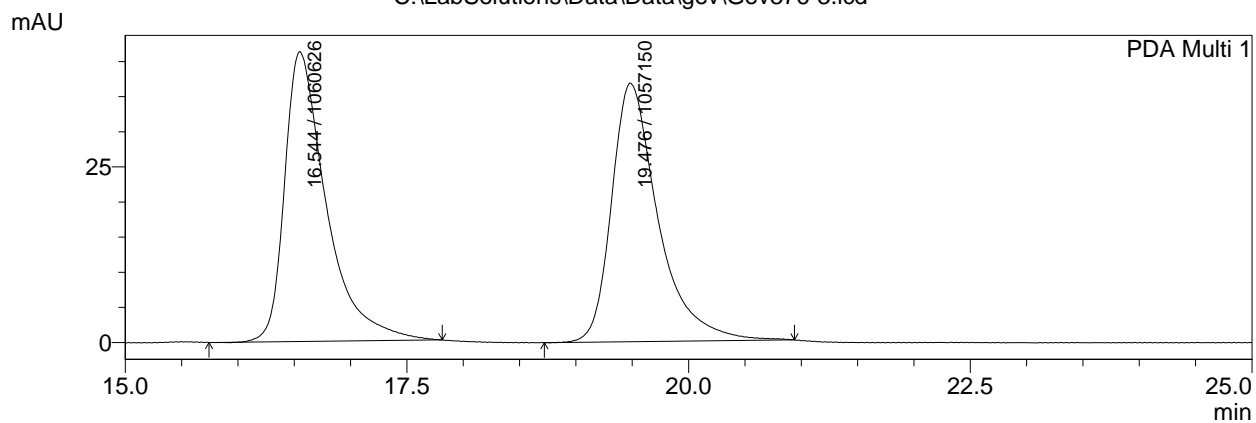

1 PDA Multi 1/254nm 4nm

PeakTable

PDA Ch1 254nm 4nm

| Peak# | Ret. Time | Area    | Height | Area %  | Height % |
|-------|-----------|---------|--------|---------|----------|
| 1     | 16.544    | 1060626 | 41261  | 50.082  | 52.833   |
| 2     | 19.476    | 1057150 | 36836  | 49.918  | 47.167   |
| Total |           | 2117776 | 78097  | 100.000 | 100.000  |

PeakTable

PDA Ch2

# ==== Shimadzu LCsolution Analysis Report ====

C:\LabSolutions\Data\Data\gev\Gev398-1.lcd

Acquired by : Admin  
 Sample Name : run  
 Sample ID :  
 Data File Name : Gev398-1.lcd  
 Method File Name : Col2\_60min\_02%C\_1ml\_min.lcm  
 Batch File Name : gev397and398.lcb  
 Data Acquired : 5/26/2010 12:17:37 PM

C:\LabSolutions\Data\Data\gev\Gev398-1.lcd

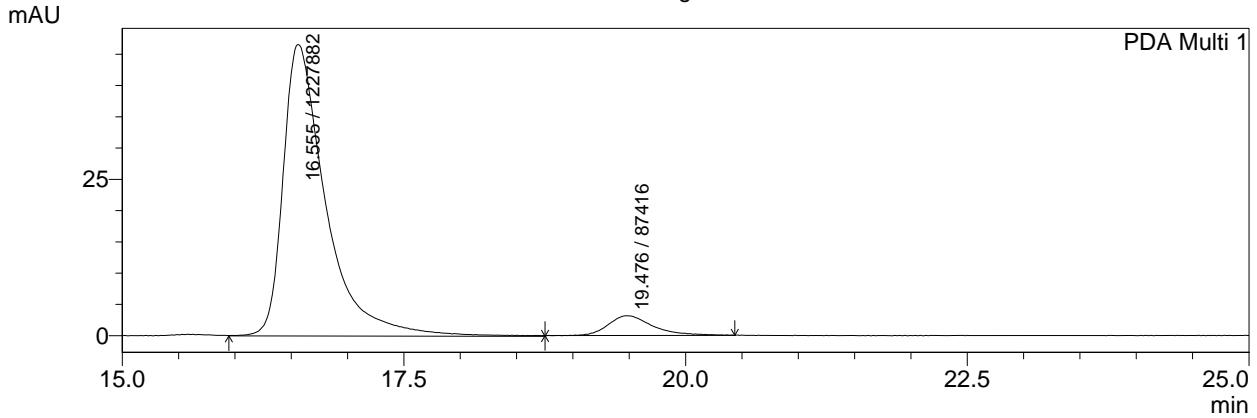

1 PDA Multi 1/254nm 4nm

PeakTable

PDA Ch1 254nm 4nm

| Peak# | Ret. Time | Area    | Height | Area %  | Height % |
|-------|-----------|---------|--------|---------|----------|
| 1     | 16.555    | 1227882 | 46575  | 93.354  | 93.590   |
| 2     | 19.476    | 87416   | 3190   | 6.646   | 6.410    |
| Total |           | 1315297 | 49765  | 100.000 | 100.000  |

PeakTable

PDA Ch2



Racemic 3g

## ==== Shimadzu LCsolution Analysis Report ====

C:\LabSolutions\Data\Data\gev\Gev388-1adh.lcd

Acquired by : Admin  
 Sample Name : run  
 Sample ID :  
 Data File Name : Gev388-1adh.lcd  
 Method File Name : Col2\_60min\_02%C\_1ml\_min.lcm  
 Batch File Name : Gev388adh.lcb  
 Data Acquired : 5/9/2010 5:58:14 PM

C:\LabSolutions\Data\Data\gev\Gev388-1adh.lcd

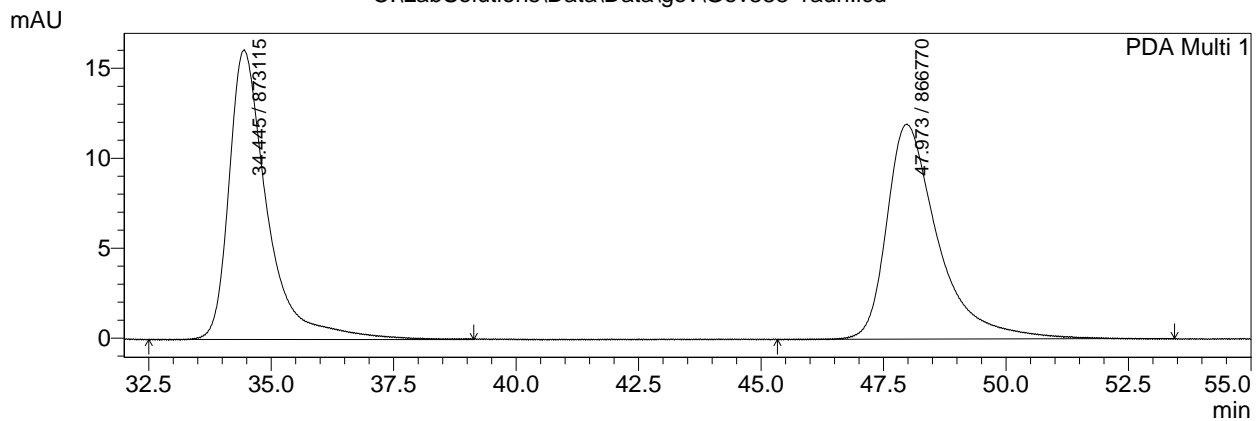

1 PDA Multi 1/254nm 4nm

PeakTable

PDA Ch1 254nm 4nm

| Peak# | Ret. Time | Area    | Height | Area %  | Height % |
|-------|-----------|---------|--------|---------|----------|
| 1     | 34.445    | 873115  | 16113  | 50.182  | 57.389   |
| 2     | 47.973    | 866770  | 11964  | 49.818  | 42.611   |
| Total |           | 1739886 | 28076  | 100.000 | 100.000  |

PeakTable

PDA Ch2

Enantioenriched 3g

## ==== Shimadzu LCsolution Analysis Report ====

C:\LabSolutions\Data\Data\gev\Gev404-3.lcd

Acquired by : Admin  
 Sample Name : run  
 Sample ID :  
 Data File Name : Gev404-3.lcd  
 Method File Name : Col2\_60min\_02%C\_1ml\_min.lcm  
 Batch File Name : Gev407efg.lcb  
 Data Acquired : 6/9/2010 7:44:33 AM

C:\LabSolutions\Data\Data\gev\Gev404-3.lcd

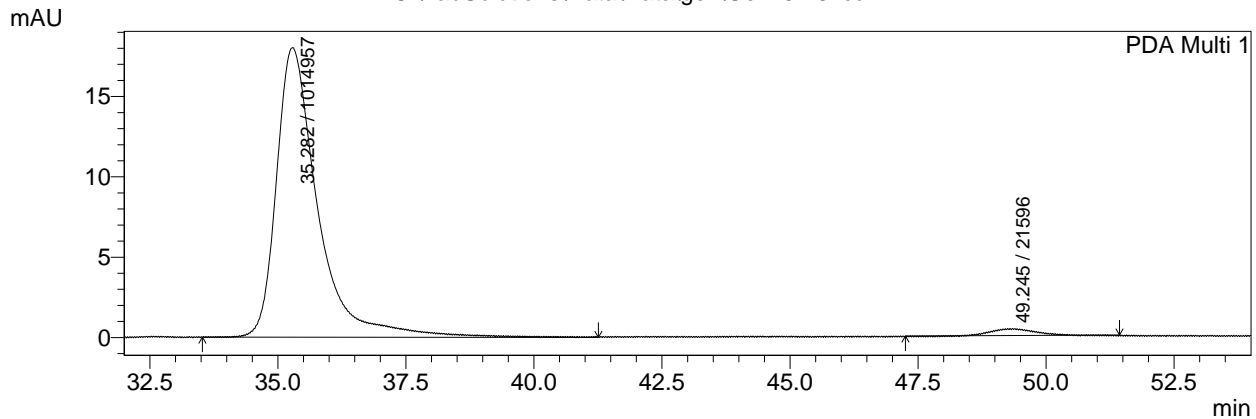

1 PDA Multi 1/254nm 4nm

PeakTable

PDA Ch1 254nm 4nm

| Peak# | Ret. Time | Area    | Height | Area %  | Height % |
|-------|-----------|---------|--------|---------|----------|
| 1     | 35.282    | 1014957 | 18023  | 97.917  | 97.642   |
| 2     | 49.245    | 21596   | 435    | 2.083   | 2.358    |
| Total |           | 1036553 | 18458  | 100.000 | 100.000  |

PeakTable

PDA Ch2

Racemic 3h

## ==== Shimadzu LCsolution Analysis Report ====

C:\LabSolutions\Data\Data\gev\Gev392-1fluoroadh.lcd

Acquired by : Admin  
 Sample Name : run  
 Sample ID :  
 Data File Name : Gev392-1fluoroadh.lcd  
 Method File Name : Col2\_60min\_02%C\_1ml\_min.lcm  
 Batch File Name : Gev390.lcb  
 Data Acquired : 5/12/2010 11:51:21 PM

C:\LabSolutions\Data\Data\gev\Gev392-1fluoroadh.lcd

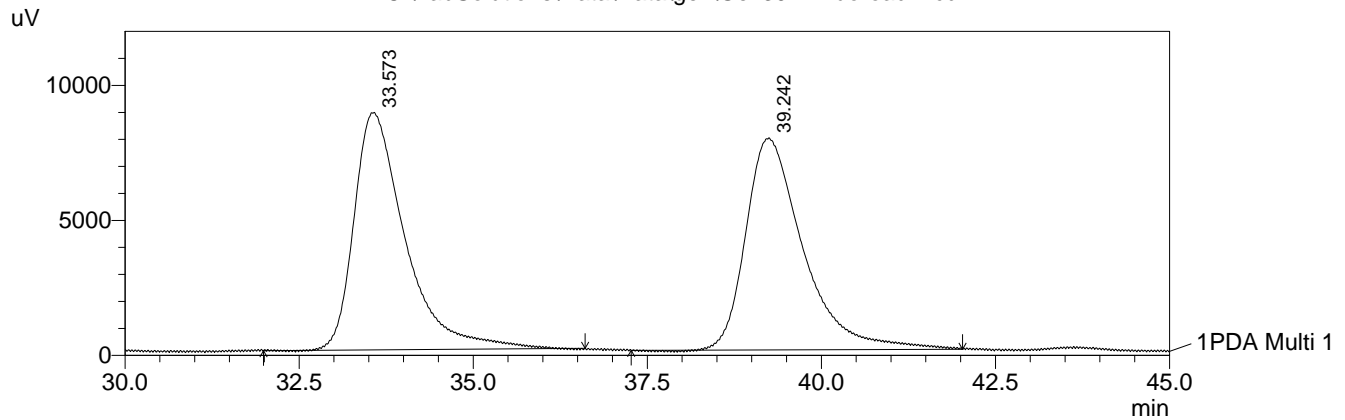

1 PDA Multi 1/254nm 4nm

PeakTable

PDA Ch1 254nm 4nm

| Peak# | Ret. Time | Area   | Height | Area %  | Height % |
|-------|-----------|--------|--------|---------|----------|
| 1     | 33.573    | 449295 | 8802   | 49.947  | 52.850   |
| 2     | 39.242    | 450245 | 7852   | 50.053  | 47.150   |
| Total |           | 899539 | 16654  | 100.000 | 100.000  |

PeakTable

PDA Ch2

PeakTable

PDA Ch3

Enantioenriched 3h

## ==== Shimadzu LCsolution Analysis Report ====

C:\LabSolutions\Data\Data\gev\Gev404-2.lcd

Acquired by : Admin  
 Sample Name : run  
 Sample ID :  
 Data File Name : Gev404-2.lcd  
 Method File Name : Col2\_60min\_02%C\_1ml\_min.lcm  
 Batch File Name : 4041and2.lcb  
 Data Acquired : 6/2/2010 2:10:09 AM

C:\LabSolutions\Data\Data\gev\Gev404-2.lcd

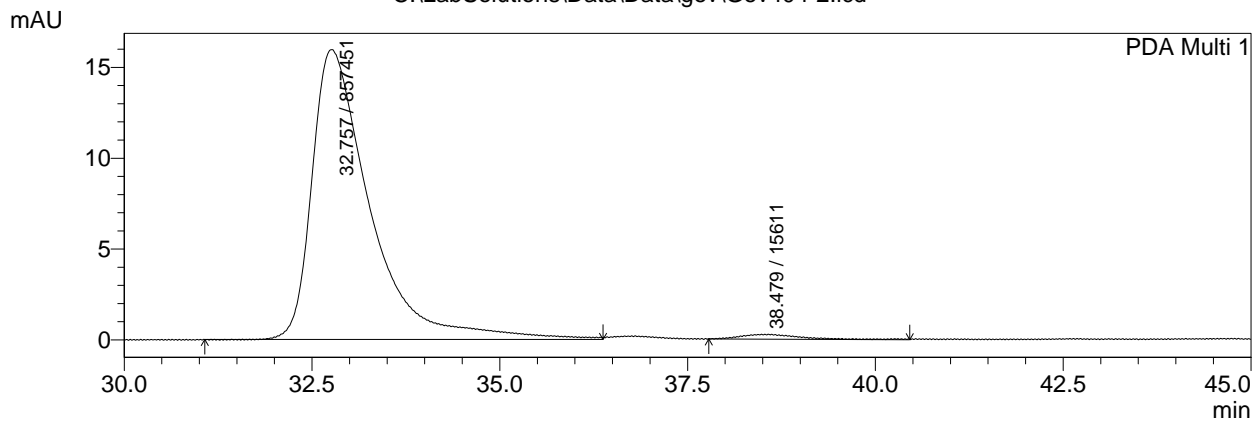

1 PDA Multi 1/254nm 4nm

PeakTable

PDA Ch1 254nm 4nm

| Peak# | Ret. Time | Area   | Height | Area %  | Height % |
|-------|-----------|--------|--------|---------|----------|
| 1     | 32.757    | 857451 | 15955  | 98.212  | 98.290   |
| 2     | 38.479    | 15611  | 278    | 1.788   | 1.710    |
| Total |           | 873063 | 16232  | 100.000 | 100.000  |

PeakTable

PDA Ch2

Racemic 3i

## ==== Shimadzu LCsolution Analysis Report ====

C:\LabSolutions\Data\Data\gev\Gev376-1.lcd

Acquired by : Admin  
 Sample Name : run  
 Sample ID :  
 Data File Name : Gev376-1.lcd  
 Method File Name : Col2\_60min\_02%C\_1ml\_min.lcm  
 Batch File Name : Gev376.lcb  
 Data Acquired : 4/27/2010 3:47:05 PM

C:\LabSolutions\Data\Data\gev\Gev376-1.lcd

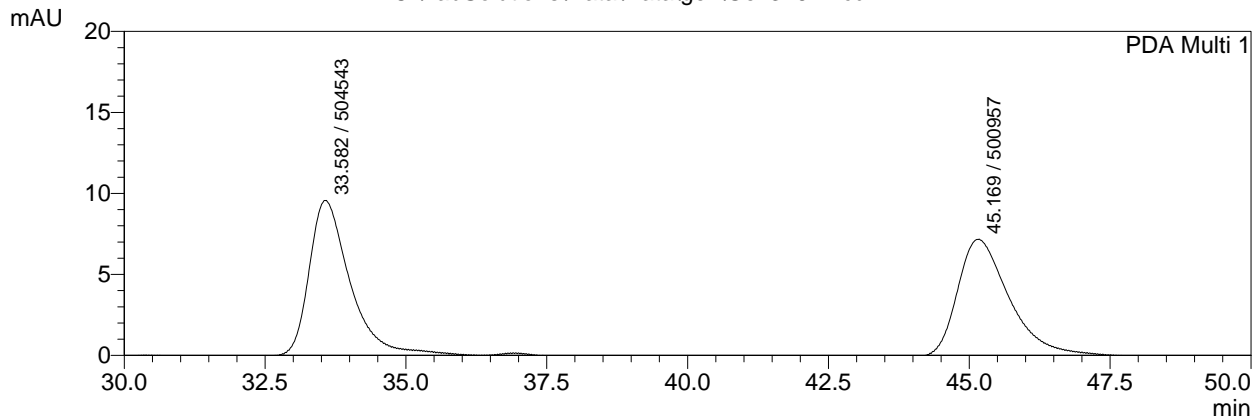

1 PDA Multi 1/254nm 4nm

PeakTable

PDA Ch1 254nm 4nm

| Peak# | Ret. Time | Area    | Height | Area %  | Height % |
|-------|-----------|---------|--------|---------|----------|
| 1     | 33.582    | 504543  | 9694   | 50.178  | 56.821   |
| 2     | 45.169    | 500957  | 7367   | 49.822  | 43.179   |
| Total |           | 1005500 | 17061  | 100.000 | 100.000  |

PeakTable

PDA Ch2

Enantioenriched 3i

## ==== Shimadzu LCsolution Analysis Report ====

C:\LabSolutions\Data\Data\gev\Gev404-4.lcd

Acquired by : Admin  
 Sample Name : run  
 Sample ID :  
 Data File Name : Gev404-4.lcd  
 Method File Name : Col2\_60min\_02%C\_1ml\_min.lcm  
 Batch File Name : 4044.lcb  
 Data Acquired : 6/2/2010 10:57:44 AM

C:\LabSolutions\Data\Data\gev\Gev404-4.lcd

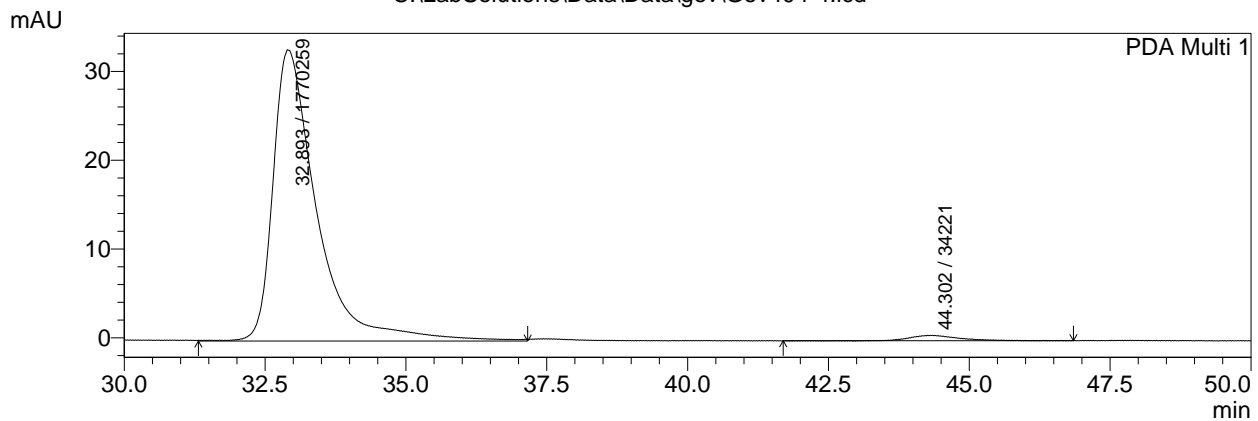

1 PDA Multi 1/254nm 4nm

PeakTable

PDA Ch1 254nm 4nm

| Peak# | Ret. Time | Area    | Height | Area %  | Height % |
|-------|-----------|---------|--------|---------|----------|
| 1     | 32.893    | 1770259 | 32818  | 98.104  | 98.175   |
| 2     | 44.302    | 34221   | 610    | 1.896   | 1.825    |
| Total |           | 1804480 | 33428  | 100.000 | 100.000  |

PeakTable

PDA Ch2

Racemic 10a

## ==== Shimadzu LCsolution Analysis Report ====

C:\LabSolutions\Data\Data\gev\Gev159-1racemic.sample.lcd  
 Acquired by : Admin  
 Sample Name : run  
 Sample ID :  
 Data File Name : Gev159-1racemic.sample.lcd  
 Method File Name : Col2\_60min\_02%C\_1ml\_min.lcm  
 Batch File Name : Gev159-1racemic.lcb  
 Data Acquired : 8/7/2009 5:06:05 PM

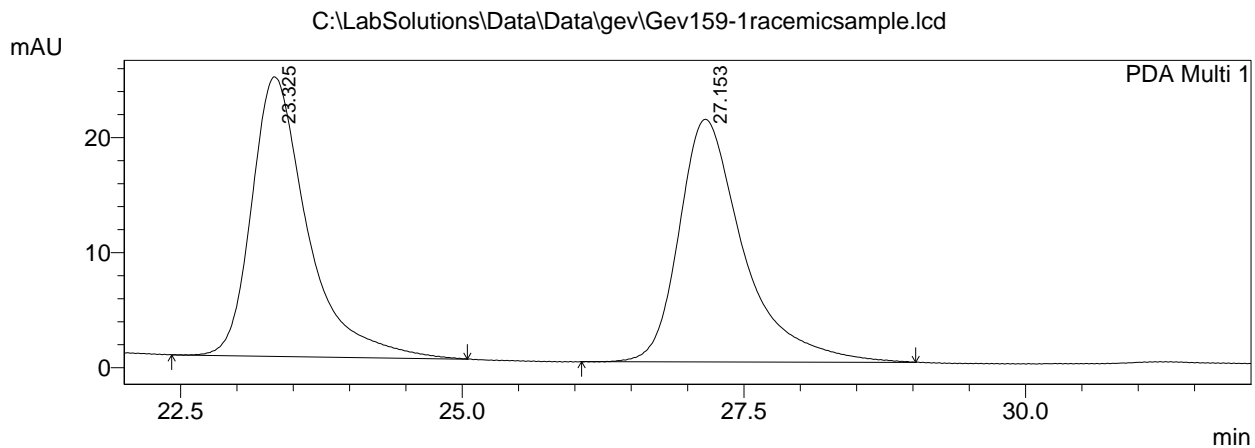

1 PDA Multi 1/254nm 4nm

PeakTable

PDA Ch1 254nm 4nm

| Peak# | Ret. Time | Area    | Height | Area %  | Height % |
|-------|-----------|---------|--------|---------|----------|
| 1     | 23.325    | 837126  | 24311  | 49.922  | 53.519   |
| 2     | 27.153    | 839743  | 21114  | 50.078  | 46.481   |
| Total |           | 1676870 | 45425  | 100.000 | 100.000  |

PeakTable

PDA Ch2

Enantioenriched 10 a

## ==== Shimadzu LCsolution Analysis Report ====

C:\LabSolutions\Data\Data\gev\Gev401-2.lcd

Acquired by : Admin  
 Sample Name : run  
 Sample ID :  
 Data File Name : Gev401-2.lcd  
 Method File Name : Col2\_60min\_02%C\_1ml\_min.lcm  
 Batch File Name : Gev407efg.lcb  
 Data Acquired : 6/9/2010 6:42:48 AM

C:\LabSolutions\Data\Data\gev\Gev401-2.lcd

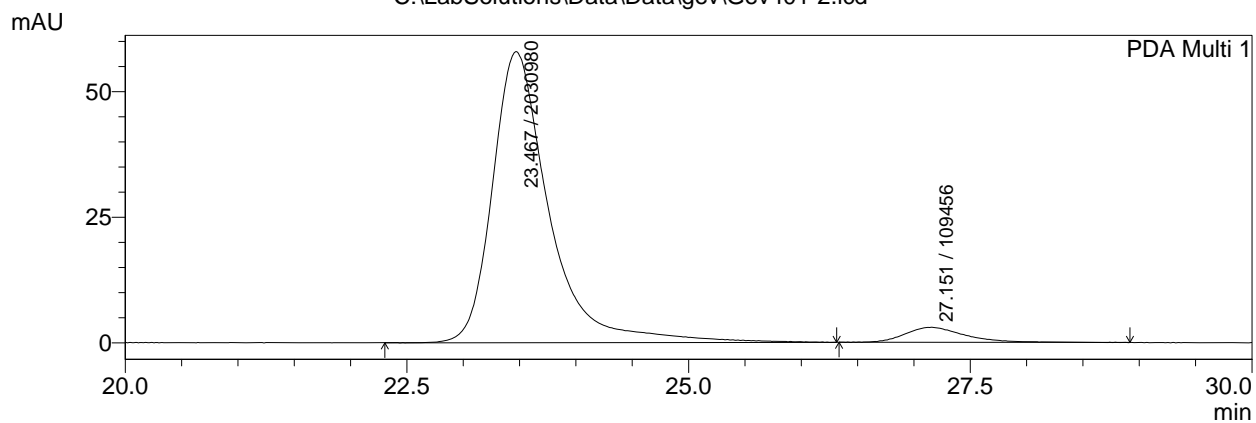

1 PDA Multi 1/254nm 4nm

PeakTable

PDA Ch1 254nm 4nm

| Peak# | Ret. Time | Area    | Height | Area %  | Height % |
|-------|-----------|---------|--------|---------|----------|
| 1     | 23.467    | 2030980 | 57942  | 94.886  | 95.079   |
| 2     | 27.151    | 109456  | 2999   | 5.114   | 4.921    |
| Total |           | 2140436 | 60941  | 100.000 | 100.000  |

PeakTable

PDA Ch2



## E. Optimization of Catalyst and Iodinating Agent

### Optimization of the Iodinating Agent

All substituted phthalimides were prepared according to the procedure used for **5** (*N*-iodo-4-fluorophthalimide) from the corresponding substituted anhydride.

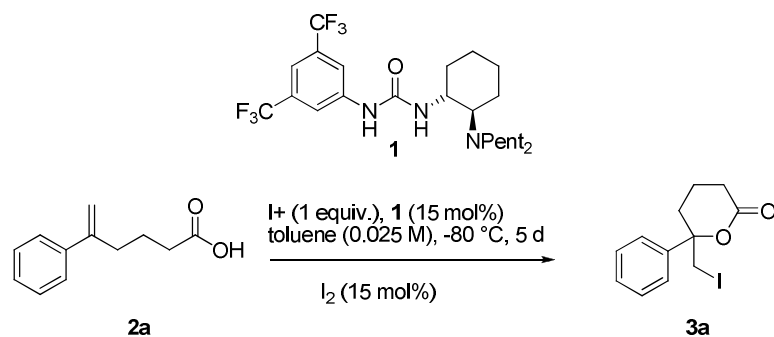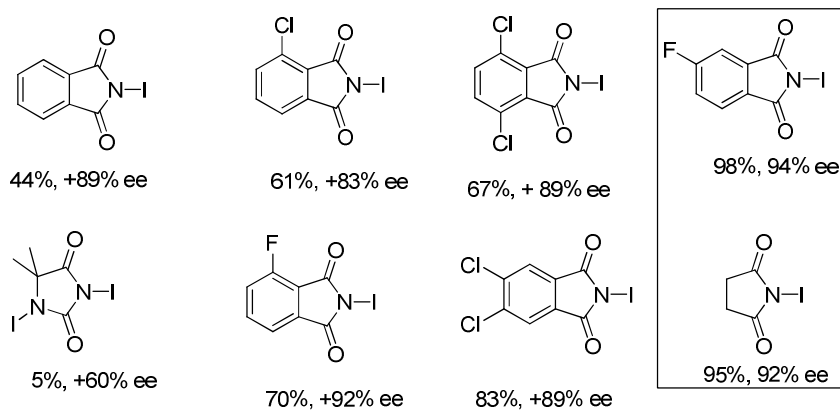

### Catalyst Optimization

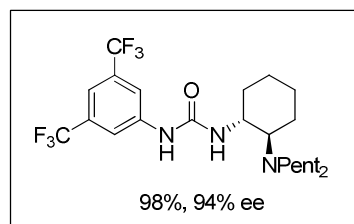

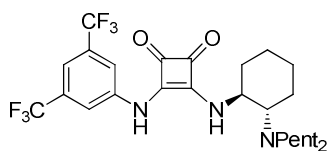

27%, -12% ee

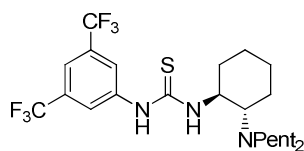

3%, +7% ee

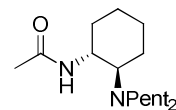

66%, +5% ee

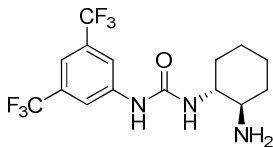

10%, +73% ee

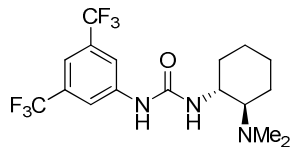

6%, +49% ee

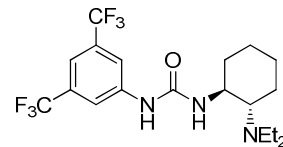

46%, -76% ee

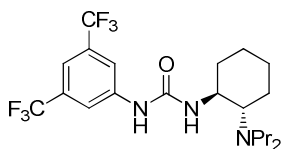

50%, -81% ee

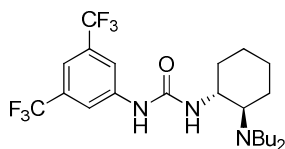

70%, +91% ee

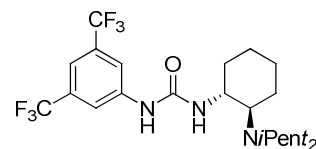

27%, + 91% ee

## F. Determination of the Absolute Configuration of the Iodolactone Products

### (3a)

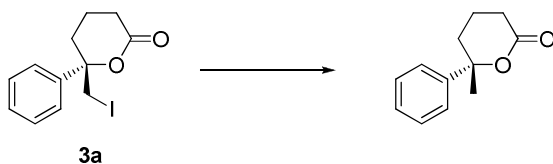

Radical-mediated deiodination<sup>[11]</sup> of **3a** (90% ee) provided the known methyl lactone<sup>[12]</sup>:  $[\alpha]_D^{24} = -34$  ( $c = 1.6$ ), literature reports the (*R*) enantiomer with 90% ee to have  $[\alpha]_D^{12} = +39.8$  ( $c = 1.0$ ,  $\text{CHCl}_3$ ); **3a** is therefore (*S*).

### (3g)

X-ray crystallographic analysis confirmed the (*S*) stereochemistry for **3g**.

### (10a)

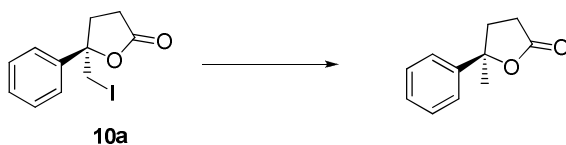

Radical-mediated deiodination<sup>[11]</sup> of **10a** (85% ee) provided the known methyl lactone<sup>[13]</sup>:  $[\alpha]_D^{24} = +51$  ( $c = 1.6$ ,  $\text{CHCl}_3$ ), literature reports the (*R*) enantiomer to have  $[\alpha]_D^{15} = +72.4$  ( $c = 1.0$ ,  $\text{CHCl}_3$ ); **10a** is therefore (*R*).

## G. Experimental Support for the Intermediacy of **7**

Premixing of 4-fluoro-*N*-iodophthalimide (0.1 mmol) with I<sub>2</sub> (0.1 mol%) and catalyst **1** (15 mol%) in toluene afforded immediate changes in the <sup>1</sup>H NMR spectrum of the catalyst **1**. Most notably, the bis-trifluoromethylphenyl protons were shifted significantly downfield. The direct quenching of this reaction with saturated aqueous sodium thiosulfate solution afforded peaks in the mass spectrum consistent with the starting catalyst **1** and also the secondary amine (which is not seen as a fragmentation product from **1**). The dealkylation of **1** is consistent with the *N*-iodo species **7** which could undergo elimination of HI to form an iminium ion, followed by hydrolysis, upon aqueous quenching.

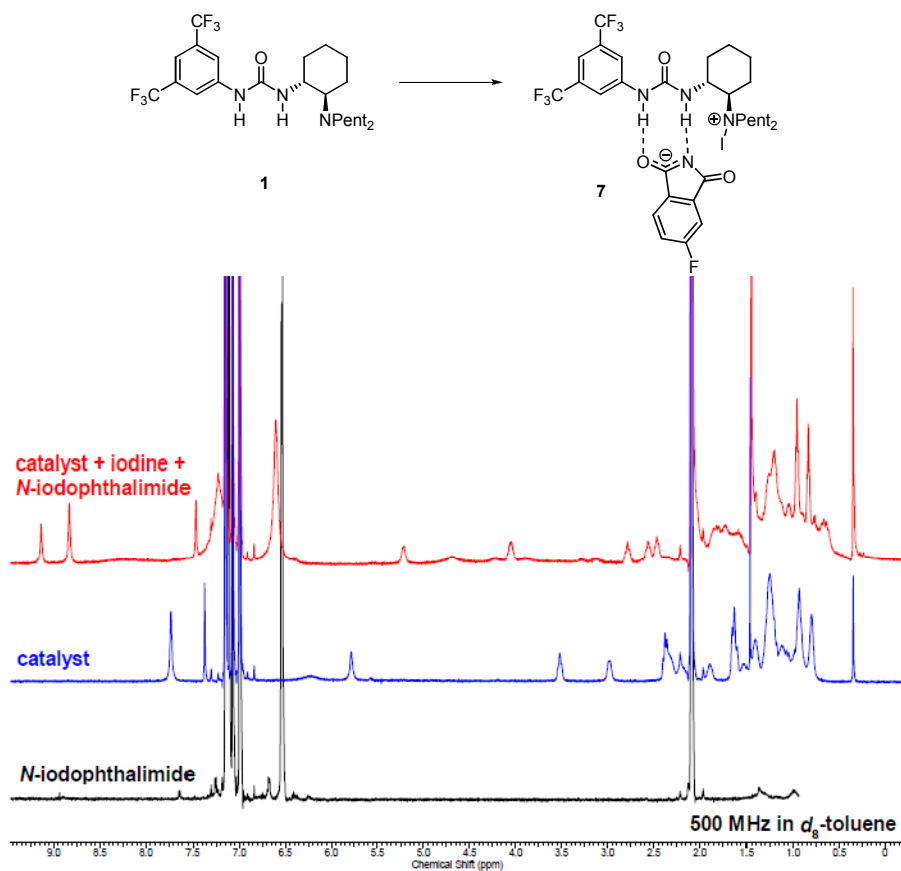

## References

- [1] J. M. Mitchell, N. S. Finney, *Tetrahedron Lett.* **2000**, *41*, 8431.
- [2] D. E. Fuerst, E. N. Jacobsen, *J. Am. Chem. Soc.*, **2005**, *127*, 8964.
- [3] For the preparation of *N*-iodophthalimide from potassium phthalimide, see:, L. Hadjarapoglou, S. Spyroudis, A. Varvoglis, *Synthesis* **1983**, 207.
- [4] For the preparation of potassium 4-fluorophthalimide see:, T. J. Watson, T. A. Ayers, N. Shah, D. Wenstrup, M. Webster, D. Freund, S. Horgan, J. P. Carey, *Org. Proc. Res. Dev.* **2003**, *7*, 521.
- [5] A. Takemiya, J. F. Hartwig, *J. Am. Chem. Soc.*, **2006**, *128*, 6042.
- [6] M. Uyanil, T. Yasui, K. Ishihara, *Bioorg. Med. Chem. Lett.* **2009**, *19*, 3848.
- [7] W. F. McCalmont, J. R. Patterson, M. A. Lindenmuth, T. N. Heady, D. M. Haverstick, L. S. Gray, T. L. MacDonald, *Bioorg. Med. Chem.* **2005**, *13*, 3821.
- [8] E. E. Lee, T. Rovis, *Org. Lett.* **2008**, *10*, 1231.
- [9] A. Ali, R. D. Desai, R. F. Hunter, S. M. Makhdhum Muhammad, *J. Chem. Soc.* **1937**, 1013.
- [10] J. Haas, S. Piguel, T. Wirth, *Org. Lett.* **2002**, *4*, 297.
- [11] For the procedure used for deiodination see: D. C Whitehead, R. Yousefi, A. Jaganathan, B. Borhan, *J. Am. Chem. Soc.*, **2010**, *132*, 3298.
- [12] M. Date, Y. Tamai, T. Hattori, H. Takayama, Y. Kamikubo, S. Miyano, *J. Chem. Soc., Perkin Trans. 1* **2001**, *2001*, 645.
- [13] A. Albinati, P. Bravo, F. Ganazzoli, G. Resnati, F. Viani, *J. Chem. Soc., Perkin Trans. 1* **1986**, 1405.
